# Supplementary material for: Early detection of Australian Aboriginal and Torres Strait Islander infants at high risk of adverse neurodevelopmental outcomes at 12 months corrected age: LEAP-CP prospective cohort study protocol
Source: PubMed Central journal article supplement — BMJ Open. 2022 Jan 7;12(1):e053646. doi: 10.1136/bmjopen-2021-053646 (PMC8744123; doi:10.1136/bmjopen-2021-053646), 2022-01-07
Supplement: bmjopen-2021-053646.draft_revisions.pdf [file bmjopen-2021-053646.draft_revisions.pdf]

# BMJ Open

BMJ Open is committed to open peer review. As part of this commitment we make the peer review history of every article we publish publicly available.

When an article is published we post the peer reviewers' comments and the authors' responses online. We also post the versions of the paper that were used during peer review. These are the versions that the peer review comments apply to.

The versions of the paper that follow are the versions that were submitted during the peer review process. They are not the versions of record or the final published versions. They should not be cited or distributed as the published version of this manuscript.

BMJ Open is an open access journal and the full, final, typeset and author-corrected version of record of the manuscript is available on our site with no access controls, subscription charges or pay-per-view fees (<http://bmjopen.bmj.com>).

If you have any questions on BMJ Open's open peer review process please email [info.bmjopen@bmj.com](mailto:info.bmjopen@bmj.com)

# BMJ Open

## Study Protocol: Early detection of Australian Aboriginal and Torres Strait Islander infants at high risk of adverse neurodevelopmental outcomes at 12 months corrected age: LEAP-CP prospective cohort study

|                                 |                                                                                                                                                                                                                                                                                                                                                                                                                                                                                                                                                                                                                                                                                                                                                                                                                                                                                                                 |
|---------------------------------|-----------------------------------------------------------------------------------------------------------------------------------------------------------------------------------------------------------------------------------------------------------------------------------------------------------------------------------------------------------------------------------------------------------------------------------------------------------------------------------------------------------------------------------------------------------------------------------------------------------------------------------------------------------------------------------------------------------------------------------------------------------------------------------------------------------------------------------------------------------------------------------------------------------------|
| Journal:                        | <i>BMJ Open</i>                                                                                                                                                                                                                                                                                                                                                                                                                                                                                                                                                                                                                                                                                                                                                                                                                                                                                                 |
| Manuscript ID                   | bmjopen-2021-053646                                                                                                                                                                                                                                                                                                                                                                                                                                                                                                                                                                                                                                                                                                                                                                                                                                                                                             |
| Article Type:                   | Protocol                                                                                                                                                                                                                                                                                                                                                                                                                                                                                                                                                                                                                                                                                                                                                                                                                                                                                                        |
| Date Submitted by the Author:   | 19-May-2021                                                                                                                                                                                                                                                                                                                                                                                                                                                                                                                                                                                                                                                                                                                                                                                                                                                                                                     |
| Complete List of Authors:       | <p>Luke, Carly; The University of Queensland, Queensland Cerebral Palsy and Rehabilitation Research Centre; Townsville Hospital and Health Service, Allied Health Women's and Families Service</p> <p>Benfer, Katherine; The University of Queensland, Queensland Cerebral Palsy and Rehabilitation Research Centre</p> <p>Mick-Ramsamy, Leeann; The University of Queensland, Queensland Cerebral Palsy and Rehabilitation Research Centre</p> <p>Ware, Robert; Griffith University, Menzies Health Institute Queensland</p> <p>Reid, Natasha; The University of Queensland, Child Health Research Centre</p> <p>Bos, Arend; University Medical Centre Groningen, neonatology</p> <p>Bosanquet, Margot; Townsville Hospital and Health Service, Allied Health Women's and Families Service</p> <p>Boyd, Roslyn; The University of Queensland, Queensland Cerebral Palsy and Rehabilitation Research Centre</p> |
| <b>Primary Subject Heading</b>: |                                                                                                                                                                                                                                                                                                                                                                                                                                                                                                                                                                                                                                                                                                                                                                                                                                                                                                                 |
| Secondary Subject Heading:      |                                                                                                                                                                                                                                                                                                                                                                                                                                                                                                                                                                                                                                                                                                                                                                                                                                                                                                                 |
| Keywords:                       | Developmental neurology & neurodisability < PAEDIATRICS, Paediatric neurology < PAEDIATRICS, Rehabilitation medicine < INTERNAL MEDICINE                                                                                                                                                                                                                                                                                                                                                                                                                                                                                                                                                                                                                                                                                                                                                                        |
|                                 |                                                                                                                                                                                                                                                                                                                                                                                                                                                                                                                                                                                                                                                                                                                                                                                                                                                                                                                 |

SCHOLARONE™  
Manuscripts

1  
2  
3 **Study Protocol: Early detection of Australian Aboriginal and Torres Strait Islander**  
4 **infants at high risk of adverse neurodevelopmental outcomes at 12 months corrected age:**  
5 **LEAP-CP prospective cohort study**  
6

7 **Authors**

8 Ms Carly Luke, MA Paed Phys Prac, BPT, PhD Scholar, Queensland Cerebral Palsy and  
9 Rehabilitation Research Centre, Child Health Research Centre, The University of  
10 Queensland, Brisbane, Australia;

11 Dr Katherine A Benfer, PhD, BScSPT, MPH, Queensland Cerebral Palsy and Rehabilitation  
12 Research Centre, Child Health Research Centre, The University of Queensland, Brisbane,  
13 Australia;

14 Ms Leeann Ramsamy, MPH, PhD scholar, Queensland Cerebral Palsy and Rehabilitation  
15 Research Centre, Child Health Research Centre, The University of Queensland, Brisbane,  
16 Australia;

17 Prof Robert Ware, PhD, Menzies Health Institute Queensland, Griffith University, Brisbane,  
18 Australia;

19 Dr Natasha Reid, PhD, B.A (Hons) (Psychology), Queensland Cerebral Palsy and  
20 Rehabilitation Research Centre, Child Health Research Centre, The University of  
21 Queensland, Brisbane, Australia;

22 Prof. Arend F. Bos, MD, PhD, University of Groningen, University Medical Center  
23 Groningen, Beatrix Children's Hospital, Division of Neonatology, Groningen, The  
24 Netherlands;

25 Dr. Margot Bosanquet, MD, Allied Health Women's and Families Service, Townsville  
26 University Hospital (TUH), Townsville Hospital and Health Service District (THHS),  
27 Townsville, Australia;

28 Prof. Roslyn N Boyd, PhD, MSc PT, Queensland Cerebral Palsy and Rehabilitation Research  
29 Centre, Child Health Research Centre, The University of Queensland, Brisbane, Australia  
30  
31

32 **Corresponding author:** Ms Carly Luke, Queensland Cerebral Palsy and Rehabilitation  
33 Research Centre, Child Health Research Centre, Level 6 Centre for Children's Health  
34 Research, 62 Graham St, South Brisbane Q 4101 Australia.

35 Email: Carly.Luke@uqconnect.edu.au; Phone: +61 7 30697363

36 **Journal: BMJ Open**

37 **Word Count** (excluding title page, abstract, references, figures and tables): 8,267 words

38 **Number of Figures: 1**

39 **Number of Tables: 1**  
40  
41  
42  
43  
44  
45  
46  
47  
48  
49  
50  
51  
52  
53  
54  
55  
56  
57  
58  
59  
60

## ABSTRACT

**Introduction** Aboriginal and Torres Strait Islander infants may experience early life factors increasing their risk of developmental vulnerability which persist into later childhood, further compounding the health inequities experienced by First Nations peoples in Australia. The LEAP-CP prospective cohort study will investigate the early identification of adverse neurodevelopmental outcomes (NDO) in ‘at risk’ Aboriginal and Torres Strait Islander infants living in Queensland, Australia. Diagnostic accuracy and feasibility of early detection tools for identifying infants ‘at risk’ of a later diagnosis of adverse NDO or neurodevelopmental disorder (NDD) will be determined.

**Methods and Analysis** Aboriginal and/ or Torres Strait Islander infants born in Queensland (birth years 2020-2022) will be invited to participate. Infants aged  $\leq 9$  months corrected age (CA) will undergo screening using the: (i) General Movements Assessment (GMA); (ii) Hammersmith Infant Neurological Examination (HINE); (iii) Rapid Neurodevelopmental Assessment (RNDA) and (iv) Ages and Stages Questionnaire - Aboriginal adaptation (ASQ-TRAK). Developmental outcomes at 12 months CA will be determined for: (i) neurological (HINE); (ii) motor (Peabody Developmental Motor Scales 2); (iii) cognitive and communication (Bayley Scales of Infant Development III); (iv) functional capabilities (Pediatric Evaluation of Disability Inventory - computer adaptive test); and (v) behaviour (Infant Toddler Social and Emotional Assessment). Infants will be classified as typically developing or ‘at risk’ of an adverse NDO and/or specific NDD based on symptomology using developmental and diagnostic outcomes for (i) CP (ii) ASD and (ii) FASD. The effects of perinatal, social and environmental factors, caregiver mental health and clinical neuroimaging on neurodevelopmental outcomes will be investigated.

**Ethics and Dissemination** Ethics approval has been granted by appropriate Queensland ethic committees with governance and support from local First Nations communities. Findings from this study will be disseminated via peer-reviewed publications and conference presentations.

**Trial registration number** ACTRN12619000969167

**Key words:** Indigenous, Aboriginal and Torres Strait Islander, infant, prospective cohort study, clinical assessment tools, neurodevelopmental outcomes, neonatal screening, cerebral palsy, autism spectrum disorder, fetal alcohol spectrum disorder

### Strengths and limitations of this study:

- This prospective population-based cohort study investigates the use of standardised screening tools to predict a later diagnosis of adverse neurodevelopmental outcomes in an Australian Aboriginal and Torres Strait Islander birth cohort.
- This study aims to implement early screening programmes for Aboriginal and Torres Strait Islander infants via targeted training of local clinicians to identify infants ‘at risk’ of adverse neurodevelopmental outcomes early and fast track infants and families to early intervention services.
- Findings of this study will inform culturally sensitive practice, including adapted resources and accepted screening tools, enabling clinicians to select both clinically meaningful and culturally appropriate tools to identify Indigenous infants ‘at risk’ of a later diagnosis of adverse neurodevelopmental outcomes and/or Neurodevelopmental Disorder.
- The remote locality of many Indigenous communities in Australia may present challenges, limiting access to health services and impacting loss to follow-up of infants at study outcome timelines.

## INTRODUCTION

In Australia, Aboriginal and Torres Strait Islander peoples, are among the most disadvantaged across all domains. In acknowledgement of the unique and distinct countries, cultures and languages of Australian First Nations people, the term 'Indigenous' is respectfully used herein to encompass but not homogenise the diverse identities of Aboriginal and Torres Strait Islander peoples.

Ongoing intergenerational trauma, systematic displacement from traditional lands, loss of culture and racism experienced by Australian Indigenous people continues to manifest in socio-economic disadvantage, marginalisation, reduced education and employment opportunities, leading to poorer health outcomes[1,2]. Indigenous Australians are 1.8 times more likely to experience disability, twice as likely to have a severe disability and are less likely to access support[3] compared to non-indigenous Australians[4,5]. Inequities in access to culturally safe health and disability support services[6], long waiting lists and the rurality of some Indigenous communities, further compounds this disadvantage[7,8]. These factors have contributed to a significant gap in health outcomes between Indigenous and non-Indigenous Australians[3,9].

Indigenous children, living in urban, rural and remote Australia, have an increased risk of adverse Neurodevelopmental Outcomes (NDO). This can include being at risk for a range of specific childhood neurodevelopmental disorders (NDD): Cerebral Palsy (CP), Fetal Alcohol Spectrum Disorder (FASD), and Autism Spectrum Disorder (ASD)[8,10,11]. These conditions are characterised by impaired development of the early central nervous system, resulting in cognitive and/or physical disability[12,13]. Indigenous children are 30% more likely to have a physical disability, and are at higher risk of developmental and intellectual difficulties, compared to non-Indigenous children[11,14,15]. The prevalence of NDDs in some remote communities are reported to be as high as 30% of the paediatric population[10].

### **Indigenous infant early life risk factors**

Many Australian Indigenous infants can experience a range of perinatal, maternal, post-neonatal (PNN) and socioeconomic risk factors that increase their risk of later adverse NDOs. While the neonatal death rate for Indigenous infants has declined, the rates of preterm birth (i.e., <37 weeks GA), low birth weight (LBW; i.e., <2500g) and small for gestational age (SGA) births has remained relatively stable[16]. In 2018, infants of Indigenous mothers were 65 percent more likely to be born pre-term, 87 percent more likely to be LBW and 52 percent more likely to be SGA, compared to babies of non-Indigenous mothers[16]. In addition, 28 percent of Indigenous infants were admitted to the neonatal intensive care unit (NICU) or special care nursery (SCN), requiring specialised medical treatment[16].

Improving Indigenous birth outcomes, including preterm birth and LBW, is a national priority for the Australian Closing the Gap Agenda[17]. Infants born pre-term and with LBW have an increased risk of adverse NDOs, which can influence school readiness and academic achievement[18-22]. Biological and environmental risk factors impact birth outcomes and are associated with increased risk of developmental vulnerability[14,23-25]. These factors are compounded by remote locality, access to appropriate and culturally sensitive antenatal care, and, socioeconomic disadvantage[23-25]. Maternal factors including age, education, health,

1  
2  
3 smoking and substance use have been linked to poorer birth outcomes[14,24,25]. In Australia,  
4 Indigenous mothers are more likely to be younger, single, attain lower levels of education, live  
5 in lower socio-economic circumstances and have lower rates of attendance at antenatal  
6 care[16,25]. Emerging evidence demonstrates the protective impact of culturally led[26]  
7 birthing programs which have led to an improved uptake in antenatal care and smoking  
8 cessation, subsequently lowering the risk of neonatal and adverse developmental outcomes[26-  
9 29].

10  
11  
12 The cultural, geographical and socio-economic barriers to healthcare access  
13 experienced by Indigenous Australians can lead to delayed identification of infants at risk of  
14 adverse NDOs with subsequent delays in receiving early intervention to optimise  
15 outcomes[11,30]. While there is consensus that early detection is important for all adverse  
16 NDOs, variability exists in the recommendations for the screening and diagnosis of CP, ASD  
17 and FASD.  
18  
19

## 20 21 **Neurodevelopmental Disorders (NDD)**

22  
23 NDDs are characterised by distinct clinical manifestations and symptomology. A  
24 transdiagnostic approach supports the notion that many NDDs share similar early markers and  
25 comorbidities across multiple neurodevelopmental domains[31-33]. Targeted early screening  
26 programs should aim to identify an infant's risk status for a range of adverse NDOs which may  
27 predict a later specific diagnosis[32,34]. Differences in quality of movement, atypical motor  
28 development, and cognition are common early risk attributes and neurodevelopmental features  
29 of CP, ASD and FASD[10,35-39]. We hypothesise that valid and reliable predictive tools  
30 utilised for the detection of CP may also identify early neurodevelopmental vulnerabilities in  
31 infants at risk of a later diagnosis of ASD and FASD and/or other substantial developmental  
32 delays.  
33  
34

### 35 36 ***Cerebral Palsy (CP)***

37  
38 Cerebral Palsy, the most common physical disability of childhood (1 in 700 live  
39 births)[40], is defined as a developmental disorder of movement and posture attributed to non-  
40 progressive disturbances in the developing brain that occur in early infancy, impacting  
41 function, participation and self-care[41]. Injury to the developing brain can occur pre-, peri-,  
42 or post-neonatally, due to a recognised event associated with brain damage[8].  
43  
44

45 Improvements in medical care and neuroprotective interventions for preterm birth,  
46 LBW and other pregnancy complications have been associated with a decline in the overall  
47 rate of CP[42]. Advances in early detection, diagnosis, prevention and intervention in high  
48 resource countries have additionally led to improvements in CP prognosis and decreased  
49 incidence[42,43]. In Australia, the trend in declining CP rates has demonstrated a decrease in  
50 incidence from 1 in 500 children to 1 in 700 children and a reduction in severity of motor  
51 function, with more children ambulant[40,43].  
52  
53

54 International Clinical Practice Guidelines support a confirmed or 'high risk' of CP  
55 diagnosis prior to 6 months CA[44]; however the age of diagnosis of CP in high income  
56 countries still occurs relatively late, usually between 12 to 24 months, delaying access to early  
57 intervention services[44]. The use of gold standard clinical assessments, such as Prechtl's  
58 Qualitative Assessment of General Movements (GMA), the Hammersmith Infant Neurological  
59  
60

1  
2  
3 Examination (HINE) and Magnetic Resonance Imaging (MRI), are recommended for reliable  
4 and accurate prediction of ‘high risk’ of CP[44,45]. Individually these tools are highly  
5 sensitive, however a combined abnormal MRI and trajectory of abnormal GMA and HINE  
6 scores demonstrates the greatest diagnostic accuracy (97.8% sensitivity and 99.2% specificity)  
7 at 3 months CA[46]. The GMA evaluates the quality of an infant’s early spontaneous  
8 movement patterns, which reflects central nervous system integrity and function[47,48]. An  
9 abnormal/absent GMA at 3 months CA is highly predictive of CP in ‘high risk’ infants[45],  
10 and may be a marker for other adverse NDOs[35,47,49-51]. Due to the time-sensitive nature  
11 of the GMA (at 11-17 weeks CA), the HINE is recommended to assess an infant’s neurological  
12 development between 3-24 months CA[44]. The HINE also provides insight into CP  
13 topography (unilateral vs bilateral)[52,53] and severity (ambulant vs non-ambulant, GMFCS  
14 I-III vs IV-V)[54-58]. While the GMA and HINE are relatively easy to administer, trained  
15 clinicians are required to evaluate and interpret scores.

16  
17  
18  
19  
20 In Australia, the rate of CP is estimated to be 50 percent higher for Indigenous  
21 children[8], with the rate of pre- or perinatally acquired CP almost three times that of non-  
22 Indigenous infants[59]. Indigenous infants with CP are more likely to be born extremely pre-  
23 term (<28 weeks) and LBW than non-Indigenous infants with CP, increasing their risk of  
24 functional severity[8,60]. Indigenous infants are five times more likely to acquire CP post-  
25 neonatally, which is associated with an increased severity of CP and linked to socioeconomic  
26 conditions[8,23,40]. In addition to higher rates of CP diagnosis, Indigenous children with CP  
27 have poorer cognitive and gross motor outcomes and a higher proportion of comorbidities,  
28 being twice as likely to have visual impairments and 50 percent have a co-diagnosis of  
29 epilepsy[8,59]. Accurate Australian data pertaining to the prevalence of CP, age of diagnosis,  
30 rates of referral and access to early intervention in Indigenous infants remains unknown.

### 31 ***Autism Spectrum Disorder (ASD)***

32  
33  
34  
35  
36  
37 Autism spectrum disorder (ASD) describes a group of heterogeneous NDDs  
38 characterised by core difficulties with social interaction and the presence of restrictive and  
39 repetitive patterns of interest or behaviours[61]. Many individuals with ASD demonstrate  
40 associated impairments in cognition, challenging behaviours, communication and motor  
41 function[38,62]. With a 42 percent increase in prevalence from 2015 to 2018 in Australia[63]  
42 the diagnosis of ASD continues to be commonly made after two years and frequently not until  
43 school age (i.e. average six years;[64]), limiting timely early intervention[65].

44  
45  
46  
47  
48  
49  
50  
51  
52  
53  
54  
55  
56  
57  
58  
59  
60  
61  
62  
63  
64  
65  
66  
67  
68  
69  
70  
71  
72  
73  
74  
75  
76  
77  
78  
79  
80  
81  
82  
83  
84  
85  
86  
87  
88  
89  
90  
91  
92  
93  
94  
95  
96  
97  
98  
99  
100  
101  
102  
103  
104  
105  
106  
107  
108  
109  
110  
111  
112  
113  
114  
115  
116  
117  
118  
119  
120  
121  
122  
123  
124  
125  
126  
127  
128  
129  
130  
131  
132  
133  
134  
135  
136  
137  
138  
139  
140  
141  
142  
143  
144  
145  
146  
147  
148  
149  
150  
151  
152  
153  
154  
155  
156  
157  
158  
159  
160  
161  
162  
163  
164  
165  
166  
167  
168  
169  
170  
171  
172  
173  
174  
175  
176  
177  
178  
179  
180  
181  
182  
183  
184  
185  
186  
187  
188  
189  
190  
191  
192  
193  
194  
195  
196  
197  
198  
199  
200  
201  
202  
203  
204  
205  
206  
207  
208  
209  
210  
211  
212  
213  
214  
215  
216  
217  
218  
219  
220  
221  
222  
223  
224  
225  
226  
227  
228  
229  
230  
231  
232  
233  
234  
235  
236  
237  
238  
239  
240  
241  
242  
243  
244  
245  
246  
247  
248  
249  
250  
251  
252  
253  
254  
255  
256  
257  
258  
259  
260  
261  
262  
263  
264  
265  
266  
267  
268  
269  
270  
271  
272  
273  
274  
275  
276  
277  
278  
279  
280  
281  
282  
283  
284  
285  
286  
287  
288  
289  
290  
291  
292  
293  
294  
295  
296  
297  
298  
299  
300  
301  
302  
303  
304  
305  
306  
307  
308  
309  
310  
311  
312  
313  
314  
315  
316  
317  
318  
319  
320  
321  
322  
323  
324  
325  
326  
327  
328  
329  
330  
331  
332  
333  
334  
335  
336  
337  
338  
339  
340  
341  
342  
343  
344  
345  
346  
347  
348  
349  
350  
351  
352  
353  
354  
355  
356  
357  
358  
359  
360  
361  
362  
363  
364  
365  
366  
367  
368  
369  
370  
371  
372  
373  
374  
375  
376  
377  
378  
379  
380  
381  
382  
383  
384  
385  
386  
387  
388  
389  
390  
391  
392  
393  
394  
395  
396  
397  
398  
399  
400  
401  
402  
403  
404  
405  
406  
407  
408  
409  
410  
411  
412  
413  
414  
415  
416  
417  
418  
419  
420  
421  
422  
423  
424  
425  
426  
427  
428  
429  
430  
431  
432  
433  
434  
435  
436  
437  
438  
439  
440  
441  
442  
443  
444  
445  
446  
447  
448  
449  
450  
451  
452  
453  
454  
455  
456  
457  
458  
459  
460  
461  
462  
463  
464  
465  
466  
467  
468  
469  
470  
471  
472  
473  
474  
475  
476  
477  
478  
479  
480  
481  
482  
483  
484  
485  
486  
487  
488  
489  
490  
491  
492  
493  
494  
495  
496  
497  
498  
499  
500  
501  
502  
503  
504  
505  
506  
507  
508  
509  
510  
511  
512  
513  
514  
515  
516  
517  
518  
519  
520  
521  
522  
523  
524  
525  
526  
527  
528  
529  
530  
531  
532  
533  
534  
535  
536  
537  
538  
539  
540  
541  
542  
543  
544  
545  
546  
547  
548  
549  
550  
551  
552  
553  
554  
555  
556  
557  
558  
559  
560  
561  
562  
563  
564  
565  
566  
567  
568  
569  
570  
571  
572  
573  
574  
575  
576  
577  
578  
579  
580  
581  
582  
583  
584  
585  
586  
587  
588  
589  
590  
591  
592  
593  
594  
595  
596  
597  
598  
599  
600  
601  
602  
603  
604  
605  
606  
607  
608  
609  
610  
611  
612  
613  
614  
615  
616  
617  
618  
619  
620  
621  
622  
623  
624  
625  
626  
627  
628  
629  
630  
631  
632  
633  
634  
635  
636  
637  
638  
639  
640  
641  
642  
643  
644  
645  
646  
647  
648  
649  
650  
651  
652  
653  
654  
655  
656  
657  
658  
659  
660  
661  
662  
663  
664  
665  
666  
667  
668  
669  
670  
671  
672  
673  
674  
675  
676  
677  
678  
679  
680  
681  
682  
683  
684  
685  
686  
687  
688  
689  
690  
691  
692  
693  
694  
695  
696  
697  
698  
699  
700  
701  
702  
703  
704  
705  
706  
707  
708  
709  
710  
711  
712  
713  
714  
715  
716  
717  
718  
719  
720  
721  
722  
723  
724  
725  
726  
727  
728  
729  
730  
731  
732  
733  
734  
735  
736  
737  
738  
739  
740  
741  
742  
743  
744  
745  
746  
747  
748  
749  
750  
751  
752  
753  
754  
755  
756  
757  
758  
759  
760  
761  
762  
763  
764  
765  
766  
767  
768  
769  
770  
771  
772  
773  
774  
775  
776  
777  
778  
779  
780  
781  
782  
783  
784  
785  
786  
787  
788  
789  
790  
791  
792  
793  
794  
795  
796  
797  
798  
799  
800  
801  
802  
803  
804  
805  
806  
807  
808  
809  
810  
811  
812  
813  
814  
815  
816  
817  
818  
819  
820  
821  
822  
823  
824  
825  
826  
827  
828  
829  
830  
831  
832  
833  
834  
835  
836  
837  
838  
839  
840  
841  
842  
843  
844  
845  
846  
847  
848  
849  
850  
851  
852  
853  
854  
855  
856  
857  
858  
859  
860  
861  
862  
863  
864  
865  
866  
867  
868  
869  
870  
871  
872  
873  
874  
875  
876  
877  
878  
879  
880  
881  
882  
883  
884  
885  
886  
887  
888  
889  
890  
891  
892  
893  
894  
895  
896  
897  
898  
899  
900  
901  
902  
903  
904  
905  
906  
907  
908  
909  
910  
911  
912  
913  
914  
915  
916  
917  
918  
919  
920  
921  
922  
923  
924  
925  
926  
927  
928  
929  
930  
931  
932  
933  
934  
935  
936  
937  
938  
939  
940  
941  
942  
943  
944  
945  
946  
947  
948  
949  
950  
951  
952  
953  
954  
955  
956  
957  
958  
959  
960  
961  
962  
963  
964  
965  
966  
967  
968  
969  
970  
971  
972  
973  
974  
975  
976  
977  
978  
979  
980  
981  
982  
983  
984  
985  
986  
987  
988  
989  
990  
991  
992  
993  
994  
995  
996  
997  
998  
999  
1000

Early motor abnormalities[38,39,66-68], reduced verbal skills, differences in social interactions[69,70] and ASD-related infant behaviours may be detected in children with ASD from 6 months CA; however, there are few ASD screening and diagnostic tools for infants <12 months of age[70,71]. The Autism Observational Schedule in Infants (AOSI) evaluates the presence of ASD-related behaviours, in infants aged 6-18 months[71-74]. Elevated AOSI scores at 12 and 18 months CA are associated with ASD diagnosis at 2 and 3 years of age, and are predictive of social-communication difficulties in high risk infants at 2 years[72-75]. Atypical responses to specific test items, including eye contact, social interest and orienting to name are discriminative between high risk infants with a subsequent diagnosis, high risk infants without subsequent diagnosis and low risk infants[74,76]. Differences in infant motor development[67,68,77] and the quality of early infant movements may provide additional

1  
2  
3 insights into ASD-related outcomes[35,47,51,78]. Studies investigating use of GMA for  
4 prediction of ASD in high risk infants, identified that >60 percent of children with a later  
5 confirmed diagnosis had abnormal or absent fidgety movements at 12-16 weeks of  
6 age[35,51,78]. Universal screening tools such as the Ages and Stages Questionnaire  
7 (ASQ;[79]) and the Rapid Neurodevelopmental Assessment (RNDA;[80]) identify infants with  
8 atypical cognitive, social and communication development, but require further investigation  
9 regarding the predictive ability of ASD-related behaviours.  
10  
11

12  
13 There is a paucity of data relating to the prevalence of ASD in Australian Indigenous  
14 populations[81]. While some studies have investigated the incidence of ASD and intellectual  
15 disability among specific Indigenous communities, accurate prevalence remains relatively  
16 unknown, with reported inconsistencies impacted by differences in cultural conceptualisation  
17 of disability, misdiagnosis, and decreased awareness of ASD among Indigenous  
18 communities[3,15,64,81-84]. There is growing concern that Indigenous children are  
19 misdiagnosed or missing out on an ASD diagnosis[6,83], supporting the need for culturally  
20 sensitive early diagnostic tools and services.  
21  
22

### 23 ***Fetal Alcohol Spectrum Disorder (FASD)***

24

25 Alcohol exposure in utero can result in adverse outcomes across multiple  
26 neurodevelopmental domains including: cognition, motor skills, brain structure, language,  
27 academic achievement, attention, and adaptive behaviour[85-87]. Fetal Alcohol Spectrum  
28 disorder (FASD) is the diagnostic term used for individuals who are exposed to alcohol  
29 prenatally and demonstrate severe impairment in 3 or more neurodevelopmental  
30 domains[86,88]. Diagnosis according to the Australian Guide is categorised as either; FASD  
31 with 3 sentinel facial features or FASD with < 3 sentinel facial features, indicating the presence  
32 or absence of facial dysmorphology specific to prenatal alcohol exposure (PAE) in the first  
33 trimester[86,87]. The co-existence of multiple comorbidities can complicate FASD diagnosis  
34 and further impact the long term sequelae[89]. FASD can be associated with an increased risk  
35 of physical health conditions[90], poor mental health, substance misuse, and involvement in  
36 the criminal justice system[91]. These lifelong consequences are extremely costly to the  
37 individual, family, health, education, disability and justice systems[92,93].  
38  
39

40  
41 The Australian Guide to the assessment and diagnosis of FASD[88] recommends early  
42 intervention, however early diagnosis and provision of appropriate treatment strategies are  
43 under-developed[94]. In the absence of facial dysmorphology, there are few accurate early  
44 biomarkers for infants at risk of FASD[85,88,89,95]. Diagnostic assessments are complex, time  
45 consuming, and require a multidisciplinary team of specialised clinicians[87,96]. Furthermore,  
46 most of the recommended standardised neurodevelopmental assessments are for children >2  
47 years[88]. The use of standardised screening tools <6 months CA, such as GMA and HINE  
48 may enable the accurate detection of neurodevelopmental delay, which could lead to earlier  
49 diagnosis of FASD.  
50  
51

52  
53 The reported prevalence of FASD and patterns of PAE in Australia are variable, due to  
54 complexities with missed or misdiagnosis, practitioners not enquiring about prenatal alcohol  
55 use, and, availability of diagnostic services[94,96,97]. In Australia, rates of FASD in some  
56 Indigenous populations are among the highest globally, impacted by the interplay of biological  
57 and psychosocial risk factors[10,97,98]. In one remote community 19 percent of school-aged  
58  
59  
60



children had a FASD diagnosis, 25 times higher than the global rate[98,99]. Furthermore, the prevalence of FASD (47 percent) among Aboriginal young people (13-17 years) in custody in WA is almost 6 times higher than that of non-Indigenous adolescents in custody[97]. The subsequent effect of PAE on developmental trajectory underpins the need for culturally sensitive, early screening tools to enable detection of infants who are high risk of FASD.

While there is emerging data on the prevalence and profile of adverse NDOs and NDDs in the Indigenous population[8,10,14,15,27,100] the focus has been on diagnosis of specific NDDs in early childhood. The aim of this cohort study is to investigate the use of early standardised screening tools (such as GMA, HINE) to determine risk status of infants aged  $\leq 12$  months CA, for a later diagnosis of CP, ASD, FASD and/or other substantial developmental delay in an 'at risk' Australian Indigenous birth cohort.

## OVERVIEW OF AIMS

### Broad Aim

The primary aim of the current study is to investigate the impact of early screening for Indigenous infants at risk of adverse NDOs due to prenatal, birth and early life factors, in terms of:

- i. Diagnostic accuracy, clinical utility and cultural appropriateness of early infant neurodevelopmental assessments to accurately predict a later 'at risk' diagnosis at 12 months CA.
- ii. Impact of perinatal variables, maternal factors and caregiver mental health on the developmental outcomes of Indigenous infants at risk of adverse NDOs in Queensland.

A comprehensive list of study aims and hypotheses are outlined in Table 1.

Table 1: LEAP-CP: Early detection study aims and hypotheses

|              |                                                                                                                                                                                                                                                                                                                                                                                                                                                                                         |
|--------------|-----------------------------------------------------------------------------------------------------------------------------------------------------------------------------------------------------------------------------------------------------------------------------------------------------------------------------------------------------------------------------------------------------------------------------------------------------------------------------------------|
| <b>AIM 1</b> | To determine the predictive accuracy, of the General Movements Assessment (GMA), the General Movements Motor Optimality Score (MOS), the Hammersmith Infant Neurological Examination (HINE), the Rapid Neurodevelopmental Assessment (RNDA), and the Ages and Stages – aboriginal adaptation (ASQ-TRAK) to predict a later outcome at 12 months CA of 'at high risk' of (i) CP or (ii) Adverse Neurodevelopmental Outcome (non-CP) or (iii) Typically developing in Indigenous infants. |
| <b>H1a</b>   | Sensitivity to detect CP at 12 months CA in Indigenous infants will be >98% for abnormal GMA (Absent Fidgety, Abnormal Fidgety) at 3 months CA and >90% for suboptimal HINE score (<60 and/or $\geq 5$ asymmetries) at 6 months CA.                                                                                                                                                                                                                                                     |
| <b>H1b</b>   | Specificity to detect CP at 12 months CA in Indigenous infants will be >90% for abnormal GMA (Absent Fidgety, Abnormal Fidgety) at 3 months CA and >85% for suboptimal HINE score (<60 and/or $\geq 5$ asymmetries) at 6 months CA.                                                                                                                                                                                                                                                     |
| <b>H1c</b>   | Indigenous infants with a confirmed or 'at risk' diagnosis of CP at 12 months will have a motor optimality score (MOS) between 8 and 14 (GMFCS I-III) or <8 (GMFCS IV and V) at 3-5 months CA, infants with a diagnosis of 'at risk' of adverse NDOs (non-CP) at 12 months CA will have a MOS <21 at 3-5 months CA.                                                                                                                                                                     |
| <b>H1d</b>   | The sensitivity and specificity of the GMA and MOS to detect an adverse NDO (non-CP) at 12 months CA will be less than that of CP.                                                                                                                                                                                                                                                                                                                                                      |

|                                                                                                                                                                                                                                                                                                                                                                             |                                                                                                                                                                                                                                                                                                                                                                                                                                                                                                                                                |
|-----------------------------------------------------------------------------------------------------------------------------------------------------------------------------------------------------------------------------------------------------------------------------------------------------------------------------------------------------------------------------|------------------------------------------------------------------------------------------------------------------------------------------------------------------------------------------------------------------------------------------------------------------------------------------------------------------------------------------------------------------------------------------------------------------------------------------------------------------------------------------------------------------------------------------------|
| <b>H1e</b>                                                                                                                                                                                                                                                                                                                                                                  | Sensitivity and specificity to detect adverse NDOs (non-CP) at 12 months CA will be $\geq 81\%$ and $\geq 71\%$ respectively for suboptimal HINE score ( $<65$ ) at 6 months or ( $<70$ ) at 9 months CA.                                                                                                                                                                                                                                                                                                                                      |
| <b>H1f</b>                                                                                                                                                                                                                                                                                                                                                                  | Indigenous infants who score 'at risk' on $\geq 1$ domain the ASQ-TRAK at 6 months CA (domain specific cut offs gross motor $<23$ , fine motor $<26$ , communication $<30$ , problem-solving $<28$ , personal-social $<26$ ) will have a diagnosis of 'at risk' of adverse NDOs (non-CP) and/or CP at 12 months CA.                                                                                                                                                                                                                            |
| <b>H1g</b>                                                                                                                                                                                                                                                                                                                                                                  | Indigenous infants who score moderate to severe on any domain of the RNDA at 6 months CA will have good to excellent specificity ( $>0.8$ ) compared to poor to fair sensitivity (0.6-0.8) to detect 'at risk' of CP and/or adverse NDOs (non-CP) at 12 months CA.                                                                                                                                                                                                                                                                             |
| <b>AIM 2</b>                                                                                                                                                                                                                                                                                                                                                                |                                                                                                                                                                                                                                                                                                                                                                                                                                                                                                                                                |
| To determine the neurological (HINE), motor (PDMS-2), cognitive (BSID-III), developmental (PEDI-CAT/ASQ-TRAK) and behavioural (ITSEA) profiles of Indigenous infants with a diagnosis of 'at risk' of specific NDDs (i) CP, (ii) ASD, (iii) FASD, and/or (iv) adverse NDO (non-specific) or (v) typically developing/borderline at 12 months CA compared to normative data. |                                                                                                                                                                                                                                                                                                                                                                                                                                                                                                                                                |
| <b>H2a</b>                                                                                                                                                                                                                                                                                                                                                                  | Indigenous infants at high risk of CP at 12 months CA will score HINE $<70$ (GMFCS I-III), or $\leq 40$ (GMFCS IV-V); BSID-III $>2SD$ below the mean (50% cognitive scale, 25% communication scale), PDMS-2 $>1$ SD below the mean (GMFCS I-III) or $>2$ SD below the mean (GMFCS IV-V) and PEDI-CAT $>1SD$ below the mean (GMFCS I-III) or $>2$ SD below the mean (GMFCS IV-V) (mobility scale).                                                                                                                                              |
| <b>H2b</b>                                                                                                                                                                                                                                                                                                                                                                  | Indigenous infants with ASD symptomology at 12 months CA will have a greater number of risk markers on the AOSI and/or will score HINE $<70$ , on average score $>1$ SD below the mean on the BSID-III (communication scale, cognitive scale), and PDMS-2, PEDI-CAT $>2$ SD below the mean (personal/social scale), ITSEA $\geq 1.5$ SD below the mean (competence domain) and/or $\geq 1.5$ SD above the mean (externalising, internalising, dysregulation domains).                                                                          |
| <b>H2c</b>                                                                                                                                                                                                                                                                                                                                                                  | Indigenous infants with FASD symptomology at 12 months CA will have microcephaly, $\leq 3$ sentinel facial features and significant impairment ( $\geq 2$ SD below the mean or equivalent) on $\geq 3$ developmental domains including motor (PDMS-2 total motor quotient, PEDI-CAT mobility), neurological ( $<70$ on the HINE), cognitive (BSID-III cognitive subscale, PEDI-CAT daily activities), communication (BSID-III language composite score), Adaptive behaviour/social skills (PEDI-CAT personal/social scales, ITSEA subdomains). |
| <b>H2d</b>                                                                                                                                                                                                                                                                                                                                                                  | Indigenous infants at risk of adverse NDOs (non-specific) at 12 months will have significant impairment ( $>2$ SD below the mean) on 1 domain and/or or mild to moderate impairment ( $>1SD$ below mean) in $\geq 2$ domains including motor (PDMS-2 total motor quotient, PEDI-CAT mobility), neurological ( $<70$ on the HINE), cognitive (BSID-III cognitive subscale, PEDI-CAT daily activities), communication (BSID-III language composite score), Adaptive behaviour/social skills (PEDI-CAT personal/social scales, ITSEA).            |
| <b>H2e</b>                                                                                                                                                                                                                                                                                                                                                                  | Indigenous infants typically developing ( $\leq 1SD$ below the mean or equivalent on all developmental domains) or borderline (mild delay; between 1 and 2SD below the mean on 1 domain) at 12 months CA will score $>70$ on the HINE (neurological), and $\leq 1$ SD below the mean on the PDMS-2, BSID-III, PEDI-CAT and ITSEA (motor, cognition, communication, self-care and personal/social scales, behaviour).                                                                                                                           |
| <b>AIM 3</b>                                                                                                                                                                                                                                                                                                                                                                |                                                                                                                                                                                                                                                                                                                                                                                                                                                                                                                                                |
| To determine the clinimetric properties of outcome and/or predictive measures used to assess a cohort of 'at risk' Indigenous infants (GMA, HINE, RNDA, ASQ-TRAK, BSID-III, PDMS-2, PEDI-CAT, ITSEA) in terms of (i) construct validity, (ii) reliability, (iii) cultural acceptability and (iv) clinical utility/feasibility.                                              |                                                                                                                                                                                                                                                                                                                                                                                                                                                                                                                                                |

|                                                                                                                                                                                                   |                                                                                                                                                                                                                                                                                                                                                                                                                                                                                                                 |
|---------------------------------------------------------------------------------------------------------------------------------------------------------------------------------------------------|-----------------------------------------------------------------------------------------------------------------------------------------------------------------------------------------------------------------------------------------------------------------------------------------------------------------------------------------------------------------------------------------------------------------------------------------------------------------------------------------------------------------|
| <b>H3a</b>                                                                                                                                                                                        | Indigenous infants who are assessed to have $\geq 2$ neurodevelopmental impairments (NDI) and/or score moderate to severe impairment on any domain of the RNDA at 6 months and 12 months CA will have suboptimal HINE scores at 6 (<65) and 12 (<70) months CA.                                                                                                                                                                                                                                                 |
| <b>H3b</b>                                                                                                                                                                                        | Indigenous infants who score 'at risk' on the communication (<16) and/or problem-solving (<28) domains of the ASQ-TRAK at 12 months CA will score $\geq 2$ SD below the mean on the language and/or cognitive domains of the BSID-III at 12 months CA.                                                                                                                                                                                                                                                          |
| <b>H3c</b>                                                                                                                                                                                        | Indigenous infants who score 'at risk' on the gross motor (<22) and/or fine motor (<35) domains of the ASQ-TRAK at 12 months CA will score $\geq 2$ SD below the mean on the Gross Motor and/or Fine Motor Quotients of the PDMS-2 at 12 months CA.                                                                                                                                                                                                                                                             |
| <b>H3d</b>                                                                                                                                                                                        | Indigenous infants who score 'at risk' on the personal-social (<22) domain of the ASQ-TRAK at 12 months CA will score $\geq 2$ SD below the mean on the corresponding domain of the PEDI-CAT and ITSEA at 12 months CA.                                                                                                                                                                                                                                                                                         |
| <b>H3e</b>                                                                                                                                                                                        | There will be strong interrater reliability and agreement ( $k > 0.8$ ) between clinicians and community health workers for the HINE, RNDA and ASQ-TRAK.                                                                                                                                                                                                                                                                                                                                                        |
| <b>H3f</b>                                                                                                                                                                                        | The clinical utility and cultural acceptability of screening tools used to predict later neurodevelopmental outcomes of Indigenous infants at $\leq 9$ months (GMA, HINE, RNDA and ASQ-TRAK) will be higher than that of tools used to measure developmental outcomes at 12 months CA (PDMS-2, BSID-III, PEDI-CAT, ITSEA).                                                                                                                                                                                      |
| <b>AIM 4</b>                                                                                                                                                                                      |                                                                                                                                                                                                                                                                                                                                                                                                                                                                                                                 |
| To determine the relationship between (i) perinatal variables, (ii) maternal risk factors and outcomes of (i) motor, (ii) cognition and (iii) development for Indigenous infants at 12 months CA. |                                                                                                                                                                                                                                                                                                                                                                                                                                                                                                                 |
| <b>H4a</b>                                                                                                                                                                                        | Adverse perinatal variables including, gestational age (<37weeks) , low birthweight (<2500g), events that signify complications during labour and delivery, adverse neonatal medical complications, and post-neonatal events including, infection, non-accidental injury, cerebro-vascular accident, will be significantly associated with lower scores on neurological, motor, cognitive, developmental and behavioural assessments at 12 months CA (HINE, PDMS-2, BSID-III, ASQ-TRAK, PEDI-CAT, RNDA, ITSEA). |
| <b>H4b</b>                                                                                                                                                                                        | Maternal risk factors (significant maternal medical conditions, antenatal medical complications and treatment, antenatal substance use and social risk factors as determined by the Social Risk Index), will be associated with lower scores on neurological, motor, cognitive, developmental and behavioural assessments at 12 months CA (HINE, PDMS-2, BSID-III, ASQ-TRAK, PEDI-CAT, RNDA, ITSEA).                                                                                                            |
| <b>H4c</b>                                                                                                                                                                                        | Elevated caregiver stress, anxiety and depression on the DASS-21 will be associated with lower scores on neurological, motor, cognitive, developmental and behavioural measures in Indigenous infants at 12 months CA (HINE, PDMS-2, BSID-III, ASQ-TRAK PEDI-CAT, RNDA, ITSEA).                                                                                                                                                                                                                                 |

## METHODS

### Study Design

This multi-site prospective cohort study of 120 Indigenous infants will be conducted in Queensland, Australia. The methodological design follows the Strengthening the Reporting of Observational Studies in Epidemiology (STROBE) guidelines[101].

### Participants

A cohort of 120 Indigenous infants with identified risk factors for adverse NDOs will be recruited. Recruitment will occur over an 18-month period (birth years 2020-2022) from the Neonatal Intensive Care Unit (NICU), Special Care Nurseries (SCN), Paediatric wards and outpatient clinics across Queensland.

## Inclusion Criteria

Infants eligible for screening will be those aged 0-9 months CA with one or both biological parents identifying as Aboriginal and/or Torres Strait Islander, who meet the following criteria:

- (i) pregnancy complications, LBW (<2500g), born preterm (<37 weeks gestation), or at term with Hypoxic Ischemic Encephalopathy (HIE), 5 min Apgar <6, history of neurological risk factors (e.g., admission to NICU/SCN, congenital abnormalities, SGA, seizures), post-neonatal complications (e.g., head injury, stroke, infection, non-accidental injury) or maternal risk factors that may impact neonatal outcomes (e.g. medical conditions, family history of adverse NDOs, antenatal substance use).
- (ii) reside in Queensland.

## Exclusion Criteria

Infants with major congenital or chromosomal abnormalities identified as part of routine medical care.

## Recruitment procedures

Infants will be recruited through Queensland Hospital and Health services (HHS) and Aboriginal Community Controlled Health Organisations with ethics and governance approvals in place (see acknowledgments). The study will be introduced to parents or caregivers of infants who meet eligibility criteria by an Indigenous Liaison Officer (ILO) or member of staff from the recruiting sites. If families are interested in participating and consent to being contacted, a member of the research team will contact the family and provide information regarding the study, including a culturally adapted parent information statement. The research team member, who is not associated with the infant's care, will explain the study in more detail and answer all parent questions prior to seeking informed consent for study participation. Families will be given the option to verbally discuss the parent information sheet with an ILO or Indigenous Community Health Worker (CHW) prior to providing written informed consent to participate. Once signed consent is obtained, the infant will be enrolled in the study and will commence the relevant screening assessments.

## Sample Size

This study aims to predict a later diagnosis of (i) typical development or 'at risk' of specific NDD, (ii) CP, (iii) ASD, (iv) FASD and/or (v) adverse NDO (non-specific) in a population of Indigenous infants with known exposure to early life risk factors. The projected sample size of 120 Indigenous infants is based on the expected number of new diagnoses of CP, ASD, FASD or adverse NDOs over an 18-month period at the study sites. The Cairns and Townsville hospitals have a potential combined total of 1400 infants admitted to their NICU and SCN's per year. Approximately 38 percent (n=540) of these infants have one or both biological parents who identify as Indigenous. The proportion of participating children with an adverse NDO we are likely to observe in the LEAP-CP cohort has been estimated by combining data from Australian data registers with data from a retrospective audit of a cohort of high risk infants admitted to the Townsville Hospital NICU or SCN during 2019-2020.

The Western Australia Cerebral Palsy register is the register that has reported rates of CP in Indigenous children for the longest duration and has a current estimate of 4.01 CP cases per

1  
2  
3 1000 births. Incidence of ASD in Indigenous Australian children is hypothesised to be  
4 approximately equal non-Indigenous rates, at between 7 and 15 ASD cases per 1000  
5 births[6,81]. Incidence of FASD in Indigenous Australians is estimated at 17 FASD cases per  
6 1000[102], but could be as much as 10-times higher in some remote communities[98]. The  
7 overall number of Indigenous children who have either developmental delay or an adverse  
8 NDO may range from 10% in low risk cohorts[14] to 30% in high risk remote  
9 communities[10].

10  
11  
12 A retrospective audit of high-risk Indigenous children admitted to the Townsville  
13 Hospital neonatal unit or SCN identified 16 children with known outcomes at 12 - 24 months  
14 CA. Of these children, 25 percent were at high risk of CP, 25 percent were at risk of a non-CP  
15 NDO, 31 percent had a non-neuromotor delay while 19 percent had no neurodevelopmental  
16 concerns. Overall >80 percent of these children were classed as having at least mild delay,  
17 although it should be noted that these children were at higher risk for an NDO than those who  
18 will participate in the LEAP-CP cohort. For the 120 children recruited to the LEAP-CP cohort  
19 we estimate approximately one-third (33 percent) will be identified as being at risk of an NDO.  
20 This will allow us to estimate the diagnostic accuracy of tools to within  $\pm 12\%$  (sensitivity) and  
21  $\pm 9\%$  (specificity), assuming accuracy of 80 percent. When identifying characteristics  
22 associated with an NDO, assuming we have a binary predictor variable with equal numbers in  
23 each category and a baseline risk of 0.33, we will have 80 percent power ( $\alpha=0.05$ ) to  
24 identify relative risks of 1.75 or greater.  
25  
26  
27  
28  
29

### 30 **Engagement with the Aboriginal and Torres Strait Islander Community**

31  
32 Members of key Indigenous communities across Queensland will be actively engaged at all  
33 stages of the research program. Consultation regarding design, cultural adaptation and delivery  
34 of information has been and will continue to be sought throughout program delivery, final  
35 analysis and data interpretation. Strategies targeting key components of cultural safety and  
36 sensitivity, consultation and co-design, capacity building and sustainability, are fundamental  
37 to the cultural framework that underpins this study and will be led by Indigenous co-  
38 investigators. Consumer engagement will be embedded into the study at key screening and  
39 outcome timepoints to evaluate parent/caregiver and CHW experience and satisfaction with the  
40 screening process and appropriateness and feasibility of assessments.  
41  
42  
43

### 44 **Data Collection Methods**

45  
46 Data collection will commence following consent and enrolment. Extensive perinatal data will  
47 be collected from the infant's medical records, including gestational age, birthweight, sex, birth  
48 history, neonatal course and maternal risk factors (See S1: LEAP-CP Medical Checklist: Part  
49 1 – Perinatal data and birth history). Primary caregivers will complete a baseline parent  
50 questionnaire that collects detailed socio-demographic information including, maternal and  
51 paternal education and employment, social support, family structure and prenatal exposures  
52 (See S1: LEAP-CP Medical Checklist: Part 2- Socio-demographic Information). Caregivers  
53 will be given the option to complete this form either independently or during a supported  
54 interview with an ILO or Indigenous CHW.  
55  
56  
57

58 Participants will be screened at two time points, (i) birth to 5 months CA, and (ii) 4 to 9 months  
59 CA. Infants can enter the study at any time between birth and 9 months CA, and will commence  
60

1  
2  
3 the relevant screening protocol based on their age at study entry. Outcome measures will be  
4 completed at 12 months CA (See Figure 1: LEAP-CP prospective cohort study timeline).  
5

### 6 ***Birth to 5 months CA (Screening stage 1)***

7  
8 Infants recruited prior to 9 weeks CA, will be assessed as an inpatient or outpatient, using the  
9 General Movements Assessment, (GMA, writhing period)[48]. The assessment will be  
10 recorded by a member of staff who is trained in the procedural guidelines for GMA and  
11 uploaded to a secure server. Between 12- and 17-weeks CA infants will be assessed twice using  
12 the GMA (fidgety period) via video taken at a clinic appointment or by an application on the  
13 caregiver's phone and later uploaded to a secure server. The General Movements smartphone  
14 application (Baby Moves;[103]) will be set up on the caregiver's phone by a member of  
15 hospital staff or the research team on recruitment to the study. Culturally adapted  
16 written/pictorial instructions will be provided to guide caregivers how to video their infant's  
17 movements, with support offered by an ILO/CHW. A reminder will be sent via the Baby Moves  
18 app to caregivers to ensure videos are recorded at two time-points (ideally at 12- and 14-weeks  
19 CA). All GMA videos will be viewed and scored by a minimum of two assessors who are  
20 advanced trained by the General Movement Trust and are masked to the participant's identity  
21 and medical history. The General Movements Motor Optimality Score (MOS) will be assessed  
22 and scored simultaneously using the infant's fidgety GMA videos by the same independent  
23 assessors[104].  
24  
25

### 26 ***Assessments at 4 to 9 months CA (Screening stage 2)***

27  
28  
29 The second stage of screening will occur from 4 to 9 months CA. Infants will attend an  
30 appointment with a local health care worker where they will be assessed using the HINE, Rapid  
31 Neurodevelopmental Assessment (RNDA), Ages and Stages – Aboriginal adaptation (ASQ-  
32 TRAK) and clinical assessment of physical features of FASD (photograph with or without  
33 direct measurement). The mother or primary caregiver will complete the Depression Anxiety  
34 Stress Scale (DASS-21). Developmental assessments will be administered and scored live by  
35 a trained allied health professional, paediatrician, CHW or child health nurse and will be video  
36 recorded to allow for independent scoring by a masked assessor. Results from all early  
37 screening assessments will be provided to the infant's treating team with parental/caregiver  
38 consent. Infants who are rated absent or abnormal fidgety movements on the GMA at 3 months  
39 CA and/ or receive a suboptimal HINE score at 4-9 months CA are considered to be at 'high  
40 risk' of CP and /or adverse NDO and will be referred to the LEAP-CP intervention trial and  
41 linked with local community health services.  
42  
43

### 44 ***Outcomes at 12 months CA***

45  
46  
47 At 12 months CA ( $\pm$  1 month) all participants will attend an appointment at their local health  
48 service. Infants will be assessed by a trained allied health clinician on the HINE, RNDA, ASQ-  
49 TRAK, Peabody Developmental Motor Scales – 2<sup>nd</sup> Edition (PDMS-2), and the cognitive and  
50 language scales of the Bayley Scales of Infant Development – 3rd edition (BSID-III). Infants  
51 will complete diagnostic specific outcome measures (i) Autism Observation Scale for Infants  
52 (AOSI; ASD) and (ii) clinical assessment of physical features of FASD (photograph with or  
53 without direct measurement) to determine the presence of symptomology and risk of a later  
54 diagnosis of ASD and/or FASD. Assessments will be recorded to allow independent scoring  
55  
56  
57  
58  
59  
60

1  
2  
3 by an assessor masked to the infant's risk of adverse NDOs, medical history and previous  
4 assessment findings. A paediatrician, masked to the infant's developmental history, will  
5 complete the medical assessment for differential diagnosis from video and photographic  
6 (FASD symptomology) assessment (See S2: LEAP CP: 12-month Medical Assessment –  
7 Differential Diagnosis). Caregivers will complete the DASS-21, Infant Toddler Social-  
8 Emotional Assessment (ITSEA), Pediatric Evaluation of Disability Inventory - Computer  
9 Adaptive Test (PEDI-CAT) and health resource and information questionnaire, either  
10 independently or as an interview supported by an ILO or CHW (See S3: LEAP – CP Medical  
11 and Allied Health Resource Form). Child outcomes will be provided to parents/caregivers via  
12 written report and results will be forwarded to the infant's treating team with parental/caregiver  
13 consent.  
14  
15  
16  
17  
18

## 19 MEASURES

### 20 Infant Predictor Variables

#### 21 *Prechtl's Qualitative Assessment of General Movements (GMA)*

22  
23  
24 Prechtl's Qualitative Assessment of General Movements (GMA) is a predictive and  
25 discriminative tool used to longitudinally observe the quality of early spontaneous movement  
26 patterns in infants from birth to 20 weeks CA. The GMA demonstrates high diagnostic  
27 accuracy, 97 percent specific and 95-98 percent sensitive, at 3 months CA for detecting infants  
28 with a later diagnosis of CP[44-46]. General Movements (GMs) are assessed over specific  
29 time periods as either writhing (birth – 9 weeks CA) or fidgety (9-20 weeks CA). Writhing  
30 movements are rated as normal, characterised by complex, variable, fluent movements  
31 involving the whole body, or abnormal, classified as either poor repertoire, cramped  
32 synchronised or chaotic[47,48]. Fidgety movements (FMs) are present from 9 weeks until  
33 voluntary, more purposeful movements become predominant[47,48]. Typical (normal) FMs  
34 are defined as small amplitude, multidirectional movements, of the trunk, neck and limbs, of  
35 moderate speed, that are continuous in the awake infant, except during periods of crying,  
36 fussing and focussed attention[47]. Atypical FMs are classified as either absent or abnormal,  
37 referring to either the absence (absent) or exaggeration (abnormal) of typical fidgety  
38 movements[47]. While the absence of FMs at 3 months is the best predictor of CP[45],  
39 abnormal GMA at writhing age has been associated with later cognitive delays[105], and  
40 abnormal fidgety GMA (abnormal or absent) has been associated with early motor delay related  
41 to prenatal substance use[36], and is emerging as a potential marker of atypical movement  
42 patterns in infants later diagnosed with ASD[35,106]. Assessment of the GMA requires a 3-5-  
43 minute video of the infant lying in supine, during periods of active wakefulness, free from  
44 distractions. In this study fidgety GMA will occur at two timepoints (ideally between 12- and  
45 17-weeks CA) to give optimal opportunity for FMs to emerge within the 'peak' window[107]  
46 and will be scored by at least two advanced trained assessors, masked to the infant's medical  
47 and clinical history, to decrease the potential impact of measurement bias.  
48  
49  
50  
51  
52  
53  
54  
55  
56  
57  
58  
59  
60

### ***General Movements Motor Optimality Score (MOS)***

The MOS is a more detailed analysis of an infant's fidgety GMA to determine their concurrent motor repertoire at 3-5 months CA by observing postural patterns and movement quality, across five subcategories[104]. The score of each subcategory; quality of fidgety movements, quality of movement patterns, age-adequate movement repertoire, postural patterns and movement character, combine to give a total MOS ranging from 5 to 28[104]. Scores  $\geq 25$  are optimal and indicative of typical outcomes, scores ranging from 20 to 24 are mildly reduced and MOS  $< 20$  requires intervention[57,104]. The presence of specific movement patterns and low scores on the MOS are predictive of a later CP diagnosis and may provide early markers for CP severity, subtype and topography[104,108,109]. Increasing evidence supports the MOS as a prognostic indicator for adverse NDOs (non-CP), and therefore, its function as a transdiagnostic screening tool. Suboptimal MOS scores have been associated with later outcomes of minor neurological dysfunction, language impairments, learning and behavioural difficulties in children without a CP diagnosis[110,111]. Additionally, a monotonous movement character was identified in almost 60% of infants who were prenatally exposed to alcohol and addictive substances[36], has been found in infants with later diagnoses of NDDs (non-CP) including ASD[51] and genetic disorders[104], and, has been linked to cognitive delays at school age in a cohort of high risk infants[112]. The MOS will be assessed and scored concurrently with fidgety GMA, by the same masked, advanced trained assessors.

### ***Hammersmith Infant Neurological Evaluation (HINE)***

The HINE is a quantifiable, neurological examination for infants aged 2-24 months CA[113]. It is predictive of suboptimal neurodevelopmental outcomes with 90 percent accuracy in predicting CP in infants aged  $> 18$  weeks CA.[44,114]. The HINE is divided into 3 sections, section 1 consists of 26 items that assesses infant neurological function across five domains: cranial nerves, posture, tone, reflexes and movements. Sections 2 and 3 evaluate the infant's motor development and state of behaviour, these sections are not scored[113]. Each item from section 1 is scored from zero to three, where a score of three is indicative of an optimal item response. Item scores are combined to determine a global optimality score, with a maximum possible score of 78. An infant's global score is compared to age specific optimality scores and cut-offs to determine risk of adverse NDOs[113]. Suboptimal HINE scores ( $< 65$ ,  $< 70$ ) at 6 and 9-12 months respectively are associated with significant delays and/or CP at 2 years[37], with further age specific cut-points ( $< 57$ ,  $< 60$ ,  $< 63$  and  $< 66$ ) at 3, 6, 9 and 12 months respectively, predictive of a later diagnosis of CP[54]. Infants with hemiplegic CP or milder neurological disorders may score above age-specific cut offs[52,54]. Differences observed in item responses between the left and right sides are recorded as asymmetries and are combined to obtain a total asymmetry score. A total of  $\geq 5$  asymmetries are associated with increased risk of unilateral CP[52]. The HINE is accessible, quick to administer, approximately 5-10 minutes, and has good interobserver reliability, even when performed by less experienced staff[113].

### ***Rapid Neurodevelopmental Assessment (RNDA)***

The RNDA is a criterion-based instrument, originally designed to comprehensively assess and identify children 'at risk' of neurodevelopmental impairment (NDI) living in low to middle



1  
2  
3 income countries with limited access to health screening services[80]. The screening tool is  
4 intended for use by lay health workers and has been successfully integrated into Aboriginal  
5 Health clinics at Gidgee Healing in Mt Isa, Queensland[115,116]. The instrument assesses the  
6 functional status of children aged 0-9 years to determine the presence and severity of NDIs  
7 across multiple domains[80,117,118]. Infants aged 1-24 months CA are assessed across eight  
8 domains: gross motor, fine motor, vision, hearing, speech, cognition, behaviour and seizures.  
9 Each item is scored on a 4-point scale, as normal = 0, mild= 0.5, moderate=1 or severe=2  
10 impairment. The sum of item scores are used to determine the presence and degree of  
11 impairment for each domain[119]. The RNDA has been validated in infants  $\leq 2$  years CA to  
12 determine the presence of NDI vs no NDI[80] and demonstrates moderate to high agreement  
13 with the Bayley Scales of Infant Development – second edition and BSID-III for identifying  
14 infants aged <12 months CA with and without NDIs[80,120]. The RNDA has good face  
15 validity, evident in its acceptability by caregivers, clinicians and infants, and has been  
16 culturally adapted for use in other countries[80,120]. The RNDA has high interrater reliability  
17 among medical professionals across the domains of gross motor (k=1.00), behaviour (k=1.00),  
18 fine motor (k=0.93) and seizures (k=0.91), with moderate agreement for cognition (k=0.80),  
19 hearing (k=0.78) and speech (0.63)[80]. A similar level of agreement was also demonstrated  
20 between local community workers and trained health professionals across cognition, speech,  
21 behaviour, gross and fine motor domains[120]. Administration time for the RNDA is between  
22 30-45 minutes and must be completed by a trained clinician or health worker[80].

### 31 ***Ages and Stages Questionnaire, Australian Aboriginal adaptation (ASQ- TRAK)***

32  
33 The ASQ-TRAK (adapted from the Ages and Stages Questionnaire 3<sup>rd</sup> edition;[79]) is the only  
34 developmental screening tool that has been adapted and validated specifically for use in an  
35 Australian Indigenous context[121,122]. The ASQ-TRAK demonstrates acceptable accuracy,  
36 sensitivity (71 percent), specificity (92 percent), for detecting developmental concerns in  
37 Indigenous children, and, has demonstrated concurrent validity with the BSID-III, with  
38 moderate correlation between corresponding domain scores on both tools[121]. The ASQ-  
39 TRAK consists of interview-based questionnaires available for children aged 2, 6, 12, 18, 24,  
40 36 and 48 months, assessing outcomes across five areas; communication, gross motor, fine  
41 motor, problem solving, personal-social[123]. The screening tool contains the same items and  
42 scoring as the ASQ-3 but is based on a caregiver interview, with opportunity for the child to  
43 demonstrate skills. Culturally relevant adaptations to the ASQ-3 include, translation into local  
44 language and item modifications to ensure cultural relevance[123]. Individual items are  
45 assessed as “yes”, “sometimes” or “not yet” to ascertain a score of 10, 5 or 0 respectively.  
46 Individual, domain specific, item scores are combined to determine the total domain score  
47 (maximum = 60). Scores are compared to domain specific cut-offs to determine risk of  
48 developmental delay, with further assessment recommended for infants who score below the  
49 cut off, or ‘at risk’, for any domain[122]. The ASQ-TRAK has proven face validity and was  
50 determined to be culturally relevant and acceptable by Aboriginal health care workers and  
51 parents[123,124]. The screener takes 30-60 minutes to complete and can be administered by  
52 trained health care workers[121].

## Outcome Measures

### 1. Infant

Outcomes will be assessed at 12 months CA ( $\pm$  2 weeks) by a trained allied health clinician and videoed for scoring by a researcher masked to perinatal data and earlier assessment data points.

#### *Peabody Developmental Motor Scales second edition (PDMS-2)*

Infant primary motor outcomes at 12 months CA will be assessed using the PDMS-2, a standardised, norm-referenced measure used to evaluate the gross and fine motor development of children aged birth to 6 years[125]. The gross motor component is comprised of four subtests: reflexes, stationary, locomotion and object manipulation. Two subtests, grasping and visual-motor integration, form the fine motor component[125]. Individual items are allocated a score from zero to two based on performance, 0 (unable to perform), 1 (partial performance) or 2 (correct performance). Subtest raw scores are used to determine motor outcomes and ascertain the presence and severity of motor delay. The PDMS-2 has demonstrated predictive validity, sensitivity (92 percent), to identify abnormal development at 18 months in preterm infants assessed at 8 months[126]. The assessment has concurrent validity with both the BSID-III[127] and the Gross Motor Functional Measure[128]. The PDMS-2 is responsive to change in a population of infants[129] and toddlers with CP[130]. The assessment takes 45-60 minutes to complete, with formal training not required for the administration and scoring of the PDMS-2.

#### *Bayley Scales of Infant Development – 3rd edition (BSID-III)*

The BSID-III is the gold standard, norm-referenced assessment for measuring the development of infants and toddlers, aged 1–42 months, to determine infant cognitive and communication outcomes at 12 months CA. The BSID-III comprises five scales, cognitive, language, motor, social-emotional and adaptive behaviour. Items are administered in a standardised procedure and scored as either credit=1 or no credit=0. A composite score of  $>2$  SD below the mean on any scale is indicative of delay and supports the need for intervention[131]. In this study we will use the BSID-III cognitive and language scales to assess infant outcomes at 12 months CA. The BSID-III (cognitive and language scales) have demonstrated predictive validity for outcomes on the Weschler Preschool and Primary Scale of Intelligence –III at 4 years of age[132]. Internal consistency reliability and test re-test reliability were determined for the composite and subtest scores on the Bayley III cognitive and language scales across all ages, with higher reliability demonstrated in age groups  $>6$  months of age[131]. The BSID-III low motor/low vision version will be used to improve validity when assessing children with mild to moderate motor and/or vision impairment[133]. While the Bayley IV is now available[134] the Bayley III will be used in this study to compare this Indigenous cohort to other non-Indigenous Australian cohorts[135]. A trained professional is required to administer the assessment, average time taken to complete varies with age and ranges from approximately 50 – 90mins[131,136].

### ***The Pediatric Evaluation of Disability Inventory-computer adaptive test (PEDI-CAT):***

Developmental outcomes in self-care, mobility and social function will be assessed at 12 months CA using the PEDI-CAT, a standardised, norm-referenced assessment of independence in self-care[137]. The PEDI-CAT has been designed for use from birth to 21 years of age and has been Rasch analysed in children with disability and typical development[137]. The instrument measures functional outcomes across four domains, daily activities, the ability to perform living skills, mobility, the ability to move around the home and in the community, and, social/cognitive the ability to participate and effectively engage in social situations. Responsibility, the fourth domain, will not be assessed in this study[137]. The tool is administered via a web-based application (Q-global), allowing parents/caregivers to self-report their child's independence on each domain. The PEDI-CAT uses an item bank which automatically lowers the number of test items dependent on how the child is scoring[137,138]. Items are scored on a 4-point difficulty scale with responses ranging from unable to easy. Normative scores are reported as a T-score and an age percentile range (<5<sup>th</sup>, 5<sup>th</sup> – 25<sup>th</sup>). The PEDI-CAT has good discriminant validity in CP populations, between children with and without disability, and, demonstrates concurrent validity with the Wee-FIM in children with brain injury and developmental disabilities[139-141]. The PEDI-CAT is frequently used as an assessment to determine entry and allocation of resources for children entering the Australian National Disability Insurance Scheme (NDIS)[142]. The test is valid, reliable and responsive in this population, takes 10-15 minutes to complete, and test administration requires no formal training[141,143].

### ***Infant Toddler Social and Emotional Assessment (ITSEA)***

The ITSEA is a 168 item, parent-report questionnaire designed to evaluate social-emotional and behavioural competencies and difficulties in infants aged 12 months to 3 years old[144]. The instrument measures items across four behavioural domains; externalising, internalising, dysregulation and competencies. Items are scored on a 3-point (0-2) scale, not true/rarely (0), somewhat true/sometimes (1), and, very true often (2)[144]. The ITSEA is discriminative between high and low risk infants with social-emotional difficulties at 12 months of age[145], and demonstrates strong test-re test reliability ( $\alpha=.75-.91$ )[146].

## **2. Diagnostic assessments**

At 12 months CA infants will be assessed by a paediatrician who will complete a medical assessment for differential diagnosis (S2: LEAP-CP 12-month Medical Assessment) including documenting the presence of ASD and FASD symptomology. Functional severity, motor type and distribution of CP will be ascertained for infants who have a confirmed or high-risk diagnosis of CP.

### ***Diagnosis of Cerebral Palsy***

Confirmed or high risk CP will be diagnosed according to published guidelines[147-149], based on clinical history (LEAP-CP Medical checklist) and videoed HINE and PDMS-2 assessments.

### **Motor type and distribution**

1  
2  
3 Motor type will be classified as spastic, dystonic, ataxic, choreoathetosis, mixed CP or  
4 unclassifiable according to Surveillance of Cerebral Palsy in Europe (SPCE) guidelines  
5 [148]. Motor distribution will be classified by number of limbs impaired and uni- or bi-lateral  
6 distribution by an independent assessor.  
7

### 8 **Functional severity**

9  
10 The Gross Motor Functional Classification System (GMFCS) has validity, reliability and  
11 stability for the classification and prediction of motor function of children with CP aged 2-12  
12 years[150-152]. The GMFCS extended and revised version, 0-2 year descriptors, will be used  
13 to classify the gross motor abilities of infants at 12 months CA[153]. The GMFCS has been  
14 correlated with CP motor type and distribution[154].  
15  
16

17  
18 The Mini Manual Abilities Classification Scale (MACS) is used to classify hand function and  
19 abilities in children aged 0-4 years and is the gold standard for classifying infant's ability to  
20 handle objects in daily activities[155]. An independent assessor will use videos to observe and  
21 classify children in one of five functional categories for each scale.  
22

### 23 ***ASD symptomology***

24  
25 The Autism Observation Scale for Infants (AOSI) will be used to measure ASD symptomology  
26 at 12 months CA [156]. The AOSI, a semi-structured observational tool, was designed to assess  
27 the presence and emergence of specific ASD related behaviours in infants aged 6-18  
28 months[71,156]. The experimenter led tool assesses 18 items, individual item scores range  
29 from 0-3 and are combined to obtain a total score, with higher scores indicating elevated risk  
30 of ASD behaviours[71]. The presence of 7 or more risk markers at 12 months was 52%  
31 sensitive and 74% specific for an ASD diagnosis at 3 years[75]. The AOSI differentiates  
32 between high-risk and low-risk infants at 12-18 months[73,75,76,157]. Inter-rater reliability  
33 for individual items and total scores is excellent (0.92 and 0.93, respectively) at 12 months and  
34 test -retest reliability is acceptable[71].  
35  
36  
37

### 38 ***FASD symptomology***

#### 39 **Assessment of PAE**

40  
41 The Alcohol Use Disorders Identification Test- Consumption (AUDIT-C) will be used to  
42 ascertain the potential level of fetal risk associated with maternal alcohol use during pregnancy  
43 (pre- and post-pregnancy recognition). The validated, sex-specific version of the instrument  
44 comprises three questions as a standardised method of assessing maternal alcohol consumption  
45 [158,159]. An AUDIT-C score of  $\geq 5$  or a reported consumption of 5 or more standard drinks  
46 on one occasion is associated with increased risk of FASD[88,159].  
47  
48

#### 49 **Sentinel Facial features**

50  
51 Clinical assessment of facial features will be completed via direct measurement (where  
52 possible) and/or assessed from a photograph, analysed using the University of Washington  
53 facial analysis software[160]. Smooth philtrum and thin upper lip will be assessed using the  
54 University of Washington Caucasian or African American (depending on what is individually  
55 appropriate) lip-philtrum guide (1 or 2), where a rank of 4 or 5 meets criteria for FASD sentinel  
56 facial features. The Scandinavian (Stromland) chart will be utilised to measure palpebral fissure  
57 length where a result of  $\geq 2$  SD below the mean ( $< 3^{\text{rd}}$  percentile) is significant [88,161].  
58  
59  
60

Standard frontal and oblique facial photographs will be analysed using the FAS Facial Photographic Analysis Software for facial dysmorphology assessment[160].

### **Severe Neurodevelopmental Impairment**

Assessment of impairment will target five of the ten neurodevelopmental domains that reflect known areas of brain function affected by PAE[88]. Infant's neurological, motor, cognitive, language and adaptive and social skills will be assessed using standardized outcome measures at 12 months CA. Severe impairment will be defined as score of  $\geq 2$  SD below the mean, or equivalent, on the HINE (neurological), PDMS-2 (motor), Bayley III (cognitive and language scales), PEDI-CAT (adaptive/social) and ITSEA (behaviour)[88]. Infants with a head circumference less than  $<3^{\text{rd}}$  centile and/or abnormal brain imaging including structural brain abnormalities will also be considered as criteria for severe brain structure/neurological impairment[88]. Presence and severity of impairment will be determined by assessors blinded to the infant's clinical history and predictor assessment outcomes.

### **Special considerations for infants**

In children under 6 years of age with all 3 sentinel facial features and microcephaly a diagnosis of FASD with 3 Sentinel Facial Features can be made, regardless of confirmed PAE and in the absence of severe neurodevelopment impairment in 3 domains. In the absence of microcephaly, children under 6 years of age with all 3 sentinel facial features are considered 'at risk of FASD', whether PAE is confirmed or unknown[88].

## **3. Parent/Caregiver**

### ***Depression Anxiety Stress Scale (DASS-21)***

Parent or primary caregiver mental health status will be assessed at two time-points (screening stage 2 and infant 12 month outcomes) using the DASS-21, a 21-item, self-reported tool designed to measure the presence of the negative emotional states of depression, anxiety and stress[162]. Individual items assess the presence of symptoms across 3 subscales (depression, anxiety and stress). Participants use a 4-point scale to reflect and rate the extent to which they have experienced each symptom over the past week. Item scores are combined to determine the severity; normal, mild, moderate, severe or extremely severe, for each emotional state[162]. The DASS-21 has demonstrated concurrent validity with the Beck depression and anxiety inventories[163,164] and has been utilised in a population of Indigenous mothers to assess maternal emotional wellbeing[165].

### **Co-Variates and Descriptive measures**

#### ***Perinatal Data***

An extensive record of antenatal, birth history and the neonatal course will be collected at the time of infant enrolment from medical records (See S1: LEAP-CP Medical checklist). Data collected will include:

- i. Demographic data including gestational age, birth weight, sex and multiple birth status.
- ii. Perinatal events that signify complications during labour and delivery, indicating increased risk of adverse NDO.

- iii. Neonatal medical complications associated with adverse NDOs including early brain injury, infection, necrotising enterocolitis, respiratory distress, bronchopulmonary dysplasia, postnatal infant steroid therapy, neonatal surgery, retinopathy of prematurity, prolonged use of oxygen and feeding status at discharge.
- iv. Maternal risk factors that may impact neonatal outcomes, including, antenatal medical complications and treatment, medical conditions (diabetes mellitus, epilepsy), antenatal substance use, mental health status and family history of adverse NDOs.

### ***Clinical neuroimaging***

Cranial Ultrasound (CUS) and MRI assessment findings will be collected and retrieved from Hospital records. Abnormal MRI, including white matter injury, cortical and grey matter lesions and brain maldevelopments may be indicative of neuroanatomy abnormalities predictive of adverse NDOs[45]. MRI findings will be utilised in the diagnostic process for CP and symptomology of FASD.

### ***Demographic data***

Demographic data will be collected at two time points:

The LEAP-CP Medical Checklist: Part 2 (S1), completed at study enrolment, details information regarding family structure and supports, primary language spoken at home, maternal and paternal education and employment status. The Social Risk Index (SRI) and the AUDIT-C questionnaire will be embedded into this document to ascertain level of family social risk and infant PAE[159,166].

The LEAP-CP Medical Resource form (S3), completed at or prior to the 12-month CA appointment, to provide information regarding their child's development, access to services and eligibility and/or access to NDIS funding.

### ***Social Risk Index (SRI)***

The 12-point SRI measures six aspects of social status; family structure, language spoken at home, maternal age at birth and primary caregiver education, occupation and income. Risk items are scored from 0-2, with a lower score associated with lower risk. Overall family risk scores will be classified as lower ( $\leq 1$ ) or higher social risk ( $> 2$ ) [167,168]

## **DATA MANAGEMENT AND ANALYSIS PLAN**

All data will be entered into a REDcap database by ID number (re-identifiable). Data analysis will be carried out using Stata v16.0[169] statistical software package . Predictor and outcome variables will be identified as continuous, categorical or binary. Analysis will explore means, variability and distributions of continuous variables and the rate of occurrence and distribution of binary variables. Infants will be categorised at 12 months CA as at risk of specific NDD, (i) CP, (ii) ASD, (iii) FASD (as defined by the presence of disorder specific symptomology) and/or (iv) adverse NDO (non-specific, defined as  $> 2SD$  below the mean or equivalent on 1 developmental domain and/  $> 1SD$  below mean in  $\geq 2$  domains), or (v) typically developing ( $\leq 1SD$  below the mean or equivalent on all developmental domains) or borderline (mild delay; between 1 and 2SD below the mean on 1 domain). Logistic regression analysis (binary outcomes), linear regression (continuous outcomes) and multinomial logistic regression (categorical outcomes) will be used to determine any associations between predictor and

1  
2  
3 outcome variables. Diagnostic statistics, including sensitivity, specificity, positive and negative  
4 predictive values and accuracy of the predictive assessments (GMA, MOS, HINE, RNDA and  
5 ASQ-TRAK) will be determined with 95% confidence intervals based on an outcome of 'at  
6 risk' of specific NDD, (i) CP, (ii) ASD, (iii) FASD and/or (iv) adverse NDO (non-specific) at  
7 12 months CA. Perinatal variables, social and environmental data, caregiver mental health  
8 outcomes (DASS-21) and clinical neuroimaging will be utilised as descriptive measures and  
9 covariates in regression models.  
10  
11  
12

## 13 **DISCUSSION**

14  
15 Results of this study will inform service delivery of follow-up pathways for Indigenous infants  
16 at risk of adverse NDOs and their families. Our findings will inform culturally sensitive  
17 practice and enable clinicians to select both clinically meaningful and culturally appropriate  
18 tools to identify Indigenous infants at high risk of adverse NDOs at an earlier age. Early  
19 detection will fast track families to access early intervention services for Indigenous infants  
20 and families and enable early referral to the targeted motor and cognitive training in the LEAP-  
21 CP clinical trial (trial registration: ACTRN12619000969167) and or mainstream allied health  
22 services to promote optimal outcomes.  
23  
24  
25

### 26 **Strengths and Limitations**

27  
28 Infants will be recruited early to establish discharge pathways and a follow up plan, with local  
29 services. Engagement, and established connections with local health services will enable  
30 locally trained Indigenous CHWs to assist in the screening process for infants and families  
31 living remotely, with support provided via telehealth as required. Culturally adapted resources,  
32 developed in partnership with Indigenous co-investigators and consumers, will be utilised to  
33 facilitate safe and sensitive communication and practices throughout the screening and  
34 diagnostic process for infants and families. This study aims to foster local Indigenous  
35 workforce capacity through skill development and training opportunities and build upon  
36 current models of care to enable feasible and sustainable early detection programs for 'at risk'  
37 Indigenous infants. Assisting existing services to implement culturally appropriate screening  
38 programs will ensure these strategies and pathways can be embedded into regular service  
39 delivery models at the conclusion of the study.  
40  
41  
42

43  
44 The cultural, geographical and language barriers within this study present potential limitations  
45 and confounding factors. The ability to follow up Indigenous infants who live remotely may  
46 be a challenge, as remote locality is a reality for many QLD Indigenous communities, which  
47 limits ability to access health services. Infants who are identified as low risk following  
48 screening may be less likely to attend their 12-month CA follow up appointment, impacting  
49 study retention. In addition, challenges in recruitment and retention of health professionals in  
50 remote communities may further limit physical access to these services.  
51  
52  
53

### 54 **Ethics and Dissemination of findings**

55  
56 Ethics committee approvals were obtained from the appropriate Indigenous ethics/governance  
57 committees (see acknowledgements). There are no known health or safety risks associated with  
58 participation in any aspect of the described study. Cultural adaptations will be made to all  
59 resources and throughout the study families will be given the option to verbally discuss any  
60

1  
2  
3 questions or concerns with an ILO or CHW to ensure comprehension of concepts, cultural and  
4 language barriers are addressed. Families can withdraw their child from the study at any time  
5 without explanation, without any penalty from staff at the treating or referring hospital or health  
6 service, or any effect on their child's care. Data collected in this study will be securely stored  
7 in a coded re-identifiable form (by ID number at the University of QLD). Summary data of  
8 outcome measures will be shared with the treating clinician and/or team with the  
9 parent/caregiver's permission.  
10  
11  
12

13  
14 Findings of this study will be of interest to medical, allied health and community health  
15 workers, working with Indigenous infants and families in urban, rural and remote communities.  
16 Findings will be disseminated via peer-reviewed publications, conference presentations,  
17 clinical practice guidelines outlining culturally appropriate screening tools and sensitively  
18 communicating a diagnosis and resources including culturally adapted factsheets.  
19  
20  
21  
22  
23  
24  
25  
26  
27  
28  
29  
30  
31  
32  
33  
34  
35  
36  
37  
38  
39  
40  
41  
42  
43  
44  
45  
46  
47  
48  
49  
50  
51  
52  
53  
54  
55  
56  
57  
58  
59  
60



## ABBREVIATIONS

|    |            |                                                                       |
|----|------------|-----------------------------------------------------------------------|
| 1  |            |                                                                       |
| 2  |            |                                                                       |
| 3  |            |                                                                       |
| 4  |            |                                                                       |
| 5  | AOSI       | Autism Observation Schedule in Infants                                |
| 6  |            |                                                                       |
| 7  | ASD        | Autism Spectrum Disorder                                              |
| 8  |            |                                                                       |
| 9  | ASQ-TRAK   | Ages and Stages – Aboriginal adaptation                               |
| 10 |            |                                                                       |
| 11 | AUDIT-C    | Alcohol Use Disorders Identification Test- Consumption                |
| 12 |            |                                                                       |
| 13 | Baby Moves | General Movements smartphone application                              |
| 14 | BSID-III   | Bayley Scales of Infant and Toddler Development – Third Edition       |
| 15 |            |                                                                       |
| 16 | CA         | Corrected age                                                         |
| 17 |            |                                                                       |
| 18 | CHW        | Community Health Worker                                               |
| 19 |            |                                                                       |
| 20 | CP         | Cerebral Palsy                                                        |
| 21 |            |                                                                       |
| 22 | CUS        | Cranial Ultrasound                                                    |
| 23 |            |                                                                       |
| 24 | DASS-21    | Depression Anxiety Stress Scale                                       |
| 25 | FASD       | Fetal Alcohol Spectrum Disorder                                       |
| 26 |            |                                                                       |
| 27 | GMA        | General Movements Assessment                                          |
| 28 |            |                                                                       |
| 29 | HHS        | Hospital and Health services                                          |
| 30 |            |                                                                       |
| 31 | HINE       | Hammersmith Infant Neurological Examination                           |
| 32 |            |                                                                       |
| 33 | ILO        | Indigenous Liaison Officer                                            |
| 34 |            |                                                                       |
| 35 | ITSEA      | Infant Toddler Social-Emotional Assessment                            |
| 36 |            |                                                                       |
| 37 | LBW        | Low Birth Weight                                                      |
| 38 |            |                                                                       |
| 39 | MRI        | Magnetic Resonance Imaging                                            |
| 40 |            |                                                                       |
| 41 | NDD        | Neurodevelopmental Disorder                                           |
| 42 |            |                                                                       |
| 43 | NDO        | Neurodevelopmental Outcome                                            |
| 44 |            |                                                                       |
| 45 | NDI        | Neurodevelopmental Impairment                                         |
| 46 |            |                                                                       |
| 47 | NICU       | Neonatal Intensive Care Unit                                          |
| 48 |            |                                                                       |
| 49 | PAE        | Prenatal Alcohol Exposure                                             |
| 50 |            |                                                                       |
| 51 | PDMS-2     | Peabody Developmental Motor Scales – 2 <sup>nd</sup> Edition          |
| 52 |            |                                                                       |
| 53 | PEDI-CAT   | Pediatric Evaluation of Disability Inventory - Computer Adaptive Test |
| 54 |            |                                                                       |
| 55 | RNDA       | Rapid Neurodevelopmental Assessment                                   |
| 56 |            |                                                                       |
| 57 | SCN        | Special Care Nursery                                                  |
| 58 |            |                                                                       |
| 59 | SGA        | Small for Gestational Age                                             |
| 60 |            |                                                                       |
|    | SRI        | Social Risk Index                                                     |

### COMPETING INTERESTS

The authors declare they have no competing interests.

### AUTHOR'S CONTRIBUTIONS

Chief investigators that have had substantial input into study design: CL,KB,RB,RW,NR,LR

Associate investigators that have provided input into study design: MP,RF,LMc,MB,KP,AP, MK,PE,FG

Study personnel responsible for ethics applications and reporting: KB,CL,RB,LR

Study personnel responsible for writing the protocol manuscript: CL,RB,KB,NR,MB,RW,LR

Study personnel responsible for recruitment, data collection, analysis and implementation of the study: CL,KB,RB,MB,AB,LR.

Chief investigators that will take lead roles in publication of the clinical outcomes of the study: CL,RB,KB,MB,RW,AB,NR,LR.

All authors have read and approved the final manuscript

### COLLABORATOR CONTRIBUTIONS

Collaborators who have provided assistance with patient care and data collection: Apunipima Cape York Health Council, Gidgee Healing, Gurriny Yealamucka Health Service Aboriginal Corporation, Townsville HHS, Cairns and Hinterland HHS, Children's Health Queensland HHS

### ACKNOWLEDGEMENTS

The LEAP-CP program received ethical approval from the Far North Queensland Health Research Ethics Committee (HREC/2019/QCH/50533 (Sep ver 2) - 1370), the Townsville HHS Human Research Ethics Committee (HREC/QTHS/56008), the University of Queensland Medical Research Ethics Committee (2020000185/HREC/2019/QCH/50533), and the Children's Health Queensland HHS Human Research Ethics Committee (HREC/20/QCHQ/63906) and research governance approval from the Apunipima Cape York Health Council Research Governance Committee (03/2019) and Gurriny Yealamucka Health Services Aboriginal Corporation (12/2020).

We acknowledge the support of the Queensland Cerebral Palsy and Rehabilitation Research Centre clinical research team (Ms Sarah Gibson, Ms Bernadette Shannon, Ms Kym Morris, Ms Christine Finn, Ms Ellena Oakes, Ms Anya Gordon, Ms Lucy Fogarty, Ms Donna Fallon and Ms Chloe Taiflos) for their clinical inputs and role as advanced General Movements assessors.

### Funding statement:

The LEAP-CP detection study is supported by project grants awarded by the Research Foundation, Cerebral Palsy Alliance; PHD02619 (CL), PG05318 (KB), the National Health and Medical Research Council; Investigator grant 1195602 (RB), Australia Early Career Fellowship 1145212 (KB), NHMRC-EU Horizon Grant 11941280 (KB/RB), Perpetual IMPACT Philanthropy grant IPAP2020/0808 (RB), Children's Health QLD 50276 (KB), The University of Queensland PhD RTP scholarship (CL)

**Trial Registration:** ACTRN12619000969167

**Web address of trial:** <http://www.ANZCTR.org.au/ACTRN12614000480684.aspx>

## REFERENCES

1. Menzies K. Understanding the Australian Aboriginal experience of collective, historical and intergenerational trauma. *Int Soc Work* 2019;62(6):1522-34. doi: 10.1177/0020872819870585 [published Online First: 2019/09/26]
2. Griffiths K, Coleman C, Lee V, et al. How colonisation determines social justice and Indigenous health—a review of the literature. *J Popul Res* 2016;33(1):9-30. doi: 10.1007/s12546-016-9164-1 [published Online First: 2016/04/04]
3. Gilroy J, Donnelly, M., Colmar, S., Parmenter, T.,. Twelve factors that can influence the participation of Aboriginal people in disability services. *Australian Indigenous Health Bulletin* 2016; 16(1). <http://healthbulletin.org.au/articles/twelve-factors-that-can-influence-the-participation-of-aboriginal-people-in-disability-services> (accessed July 16, 2020).
4. Australian Institute of Health and Welfare. The health and welfare of Australia's Aboriginal and Torres Strait Islander peoples: 2015. Canberra: AIHW, 2015.
5. Australian Bureau of Statistics. Aboriginal and Torres Strait Islander People with Disability. Canberra: ABS, 2017.
6. Lilley R, Sedgwick, M., and Pellicano, E.,. "We Look After Our Own Mob": Aboriginal and Torres Strait Islander Experiences of Autism. Sydney, Australia: Macquarie University, 2019.
7. DiGiacomo M, Delaney P, Abbott P, et al. 'Doing the hard yards': carer and provider focus group perspectives of accessing Aboriginal childhood disability services. *BMC Health Serv Res* 2013;13:326. doi: 10.1186/1472-6963-13-326 [published Online First: 2013/08/21]
8. Blair E, Watson L, O'Kearney E, et al. Comparing risks of cerebral palsy in births between Australian Indigenous and non-Indigenous mothers. *Dev Med Child Neurol* 2016;58(S2):36-42. doi: 10.1111/dmcn.13005 [published Online First: 19/01/2016]
9. Ou L, Chen J, Hillman K, et al. The comparison of health status and health services utilisation between Indigenous and non-Indigenous infants in Australia. *Aust N Z J Public Health* 2010;34(1):50-56. doi: 10.1111/j.1753-6405.2010.00473.x [published Online First: 19/02/2010]
10. Fitzpatrick JP, Latimer J, Olson HC, et al. Prevalence and profile of Neurodevelopment and Fetal Alcohol Spectrum Disorder (FASD) amongst Australian Aboriginal children living in remote communities. *Res Dev Disabil* 2017;65:114-26. doi: <https://doi.org/10.1016/j.ridd.2017.04.001> [published Online First: 09/05/2017]
11. DiGiacomo M, Davidson PM, Abbott P, et al. Childhood disability in Aboriginal and Torres Strait Islander peoples: a literature review. *Int J Equity Health* 2013;12(1):7. doi: 10.1186/1475-9276-12-7 [published Online First: 18/01/2013]
12. Bishop D, Pine D, Scott S, et al. Rutter's child and adolescent psychiatry: John Wiley & Sons 2009.
13. Accardo J, Shapiro BK. Neurodevelopmental Disabilities: Beyond the Diagnosis. *Semin Pediatr Neurol* 2005;12(4):242-49. doi: <https://doi.org/10.1016/j.spn.2005.12.006> [published Online First: 10/06/2006]
14. McDonald J, Webster V, Knight J, et al. The Gudaga Study: Development in 3-year-old urban Aboriginal children. *Journal of Paediatrics and Child Health* 2014;50(2):100-06. doi: 10.1111/jpc.12476 [published Online First: 27/12/2013]
15. Bourke J, de Klerk N, Smith T, et al. Population-Based Prevalence of Intellectual Disability and Autism Spectrum Disorders in Western Australia: A Comparison With Previous Estimates. *Medicine (Baltimore)* 2016;95(21):e3737. doi: 10.1097/md.0000000000003737 [published Online First: 2016/05/27]
16. Australian Institute of Health and Welfare. Australia's mothers and babies 2018: in brief. Perinatal statistics series no.36. Cat. no. PER 108. Canberra: AIHW, 2020.
17. Commonwealth of Australia Department of the Prime Minister and Cabinet. Closing the Gap Report 2020.
18. Van Hus J, Potharst ES, Jeukens-Visser M, et al. Motor impairments in very preterm-born children: links with other developmental deficits at 5 years of age. *Developmental Medicine & Child Neurology* 2013 doi: DOI: 10.1111/dmcn.12295 [published Online First: 21st August 2013]
19. de Kieviet JF, Piek JP, Aarnoudse-Moens CS, et al. Motor development in very preterm and very low-birth-weight children from birth to adolescence: a meta-analysis. *Jama* 2009;302(20):2235-42. doi: 10.1001/jama.2009.1708 [published Online First: 2009/11/26]
20. Saigal S, Doyle LW. An overview of mortality and sequelae of preterm birth from infancy to adulthood. *The Lancet* 2008;371(9608):261-69. doi: [http://dx.doi.org/10.1016/S0140-6736\(08\)60136-1](http://dx.doi.org/10.1016/S0140-6736(08)60136-1) [published Online First: 18/01/2008]
21. Doyle LW. Evaluation of neonatal intensive care for extremely low birth weight infants in Victoria over two decades: II. Efficiency. *Pediatrics* 2004;113(3 Pt 1):510-4. doi: 10.1542/peds.113.3.510 [published Online First: 2004/03/03]

22. Williams J, Lee KJ, Anderson PJ. Prevalence of motor-skill impairment in preterm children who do not develop cerebral palsy: a systematic review. *Dev Med Child Neurol* 2010;52(3):232-7. doi: 10.1111/j.1469-8749.2009.03544.x [published Online First: 2009/12/17]
23. Milner KM, Neal EFG, Roberts G, et al. Long-term neurodevelopmental outcome in high-risk newborns in resource-limited settings: a systematic review of the literature. *Paediatr Int Child Health* 2015;35(3):227-42. doi: 10.1179/2046905515Y.0000000043 [published Online First: 03/07/2015]
24. Gibberd AJ, Simpson JM, Jones J, et al. A large proportion of poor birth outcomes among Aboriginal Western Australians are attributable to smoking, alcohol and substance misuse, and assault. *BMC Pregnancy Childbirth* 2019;19(1):110. doi: 10.1186/s12884-019-2252-4 [published Online First: 02/04/2019]
25. Comino E, Knight J, Webster V, et al. Risk and Protective Factors for Pregnancy Outcomes for Urban Aboriginal and Non-Aboriginal Mothers and Infants: The Gudaga Cohort. *Maternal & Child Health Journal* 2012;16(3):569-78. doi: 10.1007/s10995-011-0789-6
26. Kildea S, Gao Y, Hickey S, et al. Reducing preterm birth amongst Aboriginal and Torres Strait Islander babies: A prospective cohort study, Brisbane, Australia. *EClinicalMedicine* 2019;12(9):43-51. doi: 10.1016/j.eclinm.2019.06.001 [published Online First: 24/06/2019]
27. Westrupp EM, D'Esposito F, Freemantle J, et al. Health outcomes for Australian Aboriginal and Torres Strait Islander children born preterm, low birthweight or small for gestational age: A nationwide cohort study. *PLoS One* 2019;14(2):e0212130. doi: 10.1371/journal.pone.0212130 [published Online First: 2019/02/21]
28. McInerney C, Ibiebele I, Ford JB, et al. Benefits of not smoking during pregnancy for Australian Aboriginal and Torres Strait Islander women and their babies: a retrospective cohort study using linked data. *BMJ Open* 2019;9(11):e032763. doi: 10.1136/bmjopen-2019-032763 [published Online First: 2019/11/23]
29. Homer CS, Foureur MJ, Allende T, et al. 'It's more than just having a baby' women's experiences of a maternity service for Australian Aboriginal and Torres Strait Islander families. *Midwifery* 2012;28(4):E449-55. doi: 10.1016/j.midw.2011.06.004 [published Online First: 2011/08/09]
30. D'Aprano AL, Carapetis, Jr., Andrews R. Trial of a developmental screening tool in remote Australian Aboriginal communities: A cautionary tale. *J Paediatr Child Health* 2011;47(1-2):12-17. doi: 10.1111/j.1440-1754.2010.01883.x [published Online First: 26/10/2010]
31. Nishimura T, Takei N, Tsuchiya KJ, et al. Identification of neurodevelopmental trajectories in infancy and of risk factors affecting deviant development: a longitudinal birth cohort study. *Int J Epidemiol* 2016;45(2):543-53. doi: 10.1093/ije/dyv363 [published Online First: 13/02/2016]
32. Talbott MR, Miller MR. Future Directions for Infant Identification and Intervention for Autism Spectrum Disorder from a Transdiagnostic Perspective. *J Clin Child Adolesc Psychol* 2020;49(5):688-700. doi: 10.1080/15374416.2020.1790382 [published Online First: 23/07/2020]
33. Johnson MH, Gliga T, Jones E, et al. Annual research review: Infant development, autism, and ADHD--early pathways to emerging disorders. *J Child Psychol Psychiatry* 2015;56(3):228-47. doi: 10.1111/jcpp.12328 [published Online First: 2014/10/01]
34. Finlay-Jones A, Varcin K, Leonard H, et al. Very Early Identification and Intervention for Infants at Risk of Neurodevelopmental Disorders: A Transdiagnostic Approach. *Child Dev Perspect* 2019;13(2):97-103. doi: <https://doi.org/10.1111/cdep.12319> [published Online First: 08/01/2019]
35. Einspieler C, Sigafos J, Bolte S, et al. Highlighting the first 5 months of life: General movements in infants later diagnosed with autism spectrum disorder or Rett Syndrome. *Res Autism Spectr Disord* 2014;8(3):286-91. doi: 10.1016/j.rasd.2013.12.013 [published Online First: 2014/03/01]
36. Fjortoft T, Brandal M, Brubakk A, et al. Maternal alcohol and drug use during pregnancy affects the motor behaviour and general movements of infants aged 3-4 months. *Early Hum Dev* 2020;151:105171. doi: 10.1016/j.earlhumdev.2020.105171 [published Online First: 19/08/2020]
37. Romeo DM, Cowan FM, Haataja L, et al. Hammersmith Infant Neurological Examination for infants born preterm: predicting outcomes other than cerebral palsy. *Dev Med Child Neurol* 2020 doi: <https://doi.org/10.1111/dmcn.14768> [published Online First: 18/12/2020]
38. Hedgecock JB, Dannemiller LA, Shui AM, et al. Associations of Gross Motor Delay, Behavior, and Quality of Life in Young Children With Autism Spectrum Disorder. *Physical therapy* 2018;98(4):251-59. doi: 10.1093/ptj/pzy006 [published Online First: 2018/01/13]
39. Lim YH, Licari M, Spittle AJ, et al. Early Motor Function of Children With Autism Spectrum Disorder: A Systematic Review. *Pediatrics* 2021;147(2):e2020011270. doi: 10.1542/peds.2020-011270 [published Online First: 01/02/2021]
40. Report of the Australian Cerebral Palsy Register: birth years 1995-2012, November 2018.
41. Rosenbaum P, Paneth N, Leviton A, et al. A report: the definition and classification of cerebral palsy April 2006. *Dev Med Child Neurol* 2007;49(109):8-14. doi: 10.1111/j.1469-8749.2007.tb12610.x [published Online First: 23/06/2009]

42. Novak I, Morgan C, Fahey M, et al. State of the Evidence Traffic Lights 2019: Systematic Review of Interventions for Preventing and Treating Children with Cerebral Palsy. *Curr Neurol Neurosci Rep* 2020;20(2) doi: 10.1007/s11910-020-1022-z [published Online First: 21/02/2020]
43. Galea C, McIntyre S, Smithers-Sheedy H, et al. Cerebral palsy trends in Australia (1995-2009): a population-based observational study. *Dev Med Child Neurol* 2019;61(2):186-93. doi: 10.1111/dmcn.14011 [published Online First: 06/09/2018]
44. Novak I, Morgan C, Adde L, et al. Early, Accurate Diagnosis and Early Intervention in Cerebral Palsy: Advances in Diagnosis and Treatment. *JAMA Pediatr* 2017;171(9):897-907. doi: 10.1001/jamapediatrics.2017.1689 [published Online First: 2017/07/18]
45. Bosanquet M, Copeland L, Ware R, et al. A systematic review of tests to predict cerebral palsy in young children. *Dev Med Child Neurol* 2013;55(5):418-26. doi: 10.1111/dmcn.12140 [published Online First: 2013/04/12]
46. Morgan C, Romeo DM, Chorna O, et al. The Pooled Diagnostic Accuracy of Neuroimaging, General Movements, and Neurological Examination for Diagnosing Cerebral Palsy Early in High-Risk Infants: A Case Control Study. *J Clin Med* 2019;8(11):1879. doi: 10.3390/jcm8111879 [published Online First: 05/11/2019]
47. Einspieler C, Prechtl H, Bos A, et al. Prechtl's Method on the Qualitative Assessment of General Movements in Preterm Term and Young Infants: Cambridge University Press, Mac Keith Press, Clinics in Developmental Medicine 2004.
48. Prechtl HF, Einspieler C, Cioni G, et al. An early marker for neurological deficits after perinatal brain lesions. *The Lancet* 1997;349(9062):1361-63. doi: 10.1016/S0140-6736(96)10182-3 [published Online First: 10/05/1997]
49. Hadders-Algra M, Bouwstra H, Groen SE. Quality of general movements and psychiatric morbidity at 9 to 12 years. *Early human development* 2009;85(1):1-6. doi: 10.1016/j.earlhumdev.2008.05.005
50. Peyton C, Einspieler C. General Movements: A Behavioral Biomarker of Later Motor and Cognitive Dysfunction in NICU Graduates. *Pediatr Ann* 2018;47(4):e159-e64. doi: 10.3928/19382359-20180325-01 [published Online First: 2018/04/19]
51. Zappella M, Einspieler C, Bartl-Pokorny KD, et al. What do home videos tell us about early motor and socio-communicative behaviours in children with autistic features during the second year of life — An exploratory study. *Early Hum Dev* 2015;91(10):569-75. doi: 10.1016/j.earlhumdev.2015.07.006 [published Online First: 31/07/2015]
52. Hay K, Nelin M, Carey H, et al. Hammersmith Infant Neurological Examination Asymmetry Score Distinguishes Hemiplegic Cerebral Palsy From Typical Development. *Pediatr Neurol* 2018;87:70-74. doi: <https://doi.org/10.1016/j.pediatrneurol.2018.07.002> [published Online First: 25/07/2018]
53. Romeo DMM, Guzzetta A, Scoto M, et al. Early neurologic assessment in preterm-infants: Integration of traditional neurologic examination and observation of general movements. *European journal of paediatric neurology* 2008;12(3):183-89. doi: 10.1016/j.ejpn.2007.07.008
54. Romeo DMM, Cioni M, Palermo F, et al. Neurological assessment in infants discharged from a neonatal intensive care unit. *Eur J Paediatr Neurol* 2013;17(2):192-98. doi: <https://doi.org/10.1016/j.ejpn.2012.09.006> [published Online First: 10/10/2012]
55. Ricci D, Cowan F, Pane M, et al. Neurological examination at 6 to 9 months in infants with cystic periventricular leukomalacia. *Neuropediatrics* 2006;37(4):247-52. doi: 10.1055/s-2006-924581 [published Online First: 2006/12/21]
56. Frisone MF, Mercuri E, Laroche S, et al. Prognostic value of the neurologic optimality score at 9 and 18 months in preterm infants born before 31 weeks' gestation. *J Pediatr* 2002;140(1):57-60. doi: 10.1067/mpd.2002.119626 [published Online First: 2002/01/30]
57. Einspieler C, Utsch F, Brasil P, et al. Association of Infants Exposed to Prenatal Zika Virus Infection With Their Clinical, Neurologic, and Developmental Status Evaluated via the General Movement Assessment Tool. *JAMA Netw Open* 2019;2(1):e187235. doi: 10.1001/jamanetworkopen.2018.7235 [published Online First: 2019/01/19]
58. Zang FF, Yang H, Han Q, et al. Very low birth weight infants in China: the predictive value of the motor repertoire at 3 to 5 months for the motor performance at 12 months. *Early Hum Dev* 2016;100:27-32. doi: 10.1016/j.earlhumdev.2016.03.010 [published Online First: 2016/07/09]
59. Martin T, McIntyre S, Badawi N, et al. A birds-eye view of the landscape of cerebral palsy for Aboriginal and Torres Strait Islander children in Australia. *Dev Med Child Neurol* 2020;62:38. doi: 10.1111/dmcn.14469 [published Online First: 01/03/2020]
60. Forbes-Coe A, Jones A, Crowe M, et al. Perinatal factors that contribute to the prevalence of cerebral palsy in Townsville, North Queensland. *J Neonatal Nurs* 2018;24(4):208-12. doi: <https://doi.org/10.1016/j.jnn.2017.11.017> [published Online First: 12/01/2018]

61. American Psychiatric Association. Diagnostic and Statistical Manual of Mental Disorders. 5th ed. Washington, DC2013.
62. Armstrong E, Jokel A. Language Outcomes for Preverbal Toddlers with Autism. 2012;4 doi: 10.3968/j.sll.1923156320120403.3528
63. Australian Bureau of Statistics. Autism in Australia, 2015. Australia, 2017.
64. Bent CA, Dissanayake C, Barbaro J. Mapping the diagnosis of autism spectrum disorders in children aged under 7 years in Australia, 2010-2012. *Med J Aust* 2015;202(6):317-20. doi: 10.5694/mja14.00328 [published Online First: 2015/04/04]
65. May T, Brignell A, Williams K. Autism Spectrum Disorder Prevalence in Children Aged 12–13 Years From the Longitudinal Study of Australian Children. *Autism Research* 2020;13(5):821-27. doi: 10.1002/aur.2286 [published Online First: 02/03/2020]
66. Flanagan JE, Landa R, Bhat A, et al. Head lag in infants at risk for autism: a preliminary study. *Am J Occup Ther* 2012;66(5):577-85. doi: 10.5014/ajot.2012.004192 [published Online First: 2012/08/25]
67. Esposito G, Venuti P, Maestro S, et al. An exploration of symmetry in early autism spectrum disorders: Analysis of lying. *Brain Dev* 2009;31(2):131-38. doi: 10.1016/j.braindev.2008.04.005 [published Online First: 014/06/2008]
68. Teitelbaum P, Teitelbaum O, Nye J, et al. Movement analysis in infancy may be useful for early diagnosis of autism. *Proc Natl Acad Sci U S A* 1998;95(23):13982-7. doi: 10.1073/pnas.95.23.13982 [published Online First: 1998/11/13]
69. Franchini M, Duku E, Armstrong V, et al. Variability in Verbal and Nonverbal Communication in Infants at Risk for Autism Spectrum Disorder: Predictors and Outcomes. *J Autism Dev Disord* 2018;48(10):3417-31. doi: 10.1007/s10803-018-3607-9 [published Online First: 16/05/2018]
70. Barbaro J, Dissanayake C. Early markers of autism spectrum disorders in infants and toddlers prospectively identified in the Social Attention and Communication Study. *Autism* 2012;17(1):64-86. doi: 10.1177/1362361312442597 [published Online First: 26/06/2012]
71. Bryson SE, Zwaigenbaum L, McDermott C, et al. The Autism Observation Scale for Infants: Scale Development and Reliability Data. *J Autism Dev Disord* 2008;38(4):731-38. doi: 10.1007/s10803-007-0440-y [published Online First: 17/09/2007]
72. Bedford R, Gliga T, Shephard E, et al. Neurocognitive and observational markers: prediction of autism spectrum disorder from infancy to mid-childhood. *Mol Autism* 2017;8:49. doi: 10.1186/s13229-017-0167-3 [published Online First: 2017/10/12]
73. Gammer I, Bedford R, Elsabbagh M, et al. Behavioural markers for autism in infancy: scores on the Autism Observational Scale for Infants in a prospective study of at-risk siblings. *Infant Behav Dev* 2015;38:107-15. doi: 10.1016/j.infbeh.2014.12.017 [published Online First: 2015/02/07]
74. Zwaigenbaum L, Bryson S, Rogers T, et al. Behavioral manifestations of autism in the first year of life. *Int J Dev Neurosci* 2005;23(2-3):143-52. doi: 10.1016/j.ijdevneu.2004.05.001 [published Online First: 02/06/2004]
75. Zwaigenbaum L, Bryson SE, Brian J, et al. Assessment of Autism Symptoms From 6 to 18 Months of Age Using the Autism Observation Scale for Infants in a Prospective High-Risk Cohort. *Child Dev* 2020 doi: <https://doi.org/10.1111/cdev.13485> [published Online First: 25/12/2020]
76. Brian J, Bryson SE, Garon N, et al. Clinical assessment of autism in high-risk 18-month-olds. *Autism* 2008;12(5):433-56. doi: 10.1177/1362361308094500 [published Online First: 2008/09/23]
77. Teitelbaum O, Benton T, Shah PK, et al. Eshkol-Wachman movement notation in diagnosis: the early detection of Asperger's syndrome. *Proc Natl Acad Sci U S A* 2004;101(32):11909-14. doi: 10.1073/pnas.0403919101 [published Online First: 2004/07/30]
78. Hadders-Algra M, Bouwstra H, Groen SE. Quality of general movements and psychiatric morbidity at 9 to 12 years. *Early Hum Dev* 2009;85(1):1-6. doi: 10.1016/j.earlhumdev.2008.05.005 [published Online First: 20/06/2008]
79. Squires J, Bricker D. Ages and Stages Questionnaires, Third Edition (ASQ-3): A Parent-Completed Child Monitoring System. Baltimore: Paul H. Brookes Publishing Co., Inc. 2009.
80. Khan NZ, Muslima H, Begum D, et al. Validation of rapid neurodevelopmental assessment instrument for under-two-year-old children in Bangladesh. *Pediatrics* 2010;125(4):e755-e62. doi: 10.1542/peds.2008-3471 [published Online First: 22/03/2010]
81. Bailey B, Arciuli J. Indigenous Australians with autism: A scoping review. *Autism* 2020;1362361319894829. doi: 10.1177/1362361319894829 [published Online First: 13/01/2020]
82. Roy M, Balaratnasingam S. Missed Diagnosis of Autism in an Australian Indigenous Psychiatric Population. *Australas Psychiatry* 2010;18(6):534-37. doi: 10.3109/10398562.2010.498048 [published Online First: 01/10/2010]

- 1
- 2
- 3
- 4 83. Leonard H, Glasson E, Nassar N, et al. Autism and Intellectual Disability Are Differentially Related to
- 5 Sociodemographic Background at Birth. *PLOS ONE* 2011;6(3):e17875. doi:
- 6 10.1371/journal.pone.0017875 [published Online First: 30/03/2011]
- 7 84. Lilley R, Sedgwick M, Pellicano E. Inclusion, acceptance, shame and isolation: Attitudes to autism in
- 8 Aboriginal and Torres Strait Islander communities in Australia. *Autism* 2020;24(7):1860-73. doi:
- 9 10.1177/1362361320928830 [published Online First: 12/06/2020]
- 10 85. Lange S, Rovet J, Rehm J, et al. Neurodevelopmental profile of Fetal Alcohol Spectrum Disorder: A
- 11 systematic review.(Report). *BMC Psychol* 2017;5(1) doi: 10.1186/s40359-017-0191-2 [published
- 12 Online First: 23/06/2017]
- 13 86. Sokol RJ, Delaney-Black V, Nordstrom B. Fetal Alcohol Spectrum Disorder. *JAMA* 2003;290(22):2996-99.
- 14 doi: 10.1001/jama.290.22.2996 [published Online First: 10/12/2003]
- 15 87. Cook JL, Green CR, Lilley CM, et al. Fetal alcohol spectrum disorder: a guideline for diagnosis across the
- 16 lifespan. *CMAJ* 2016;188(3):191-97. doi: 10.1503/cmaj.141593 [published Online First: 2015/12/17]
- 17 88. Bower C, Elliott E, on behalf of the steering group. Report to the Australian Government Department of
- 18 Health: "Australian Guide to the diagnosis of Fetal Alcohol Spectrum Disorder (FASD)", 2016.
- 19 89. Popova S, Lange S, Shield K, et al. Comorbidity of fetal alcohol spectrum disorder: a systematic review and
- 20 meta-analysis. *The Lancet* 2016;387(10022):978-87. doi: [https://doi.org/10.1016/S0140-](https://doi.org/10.1016/S0140-6736(15)01345-8)
- 21 [6736\(15\)01345-8](https://doi.org/10.1016/S0140-6736(15)01345-8) [published Online First: 06/01/2016]
- 22 90. Reid N, Hayes N, Young SB, et al. Caregiver-reported physical health status of children and young people
- 23 with fetal alcohol spectrum disorder. *Journal of Developmental Origins of Health and Disease* 2020:1-
- 24 8. doi: 10.1017/S2040174420000537 [published Online First: 2020/06/09]
- 25 91. Streissguth PA, Bookstein LF, Barr MH, et al. Risk Factors for Adverse Life Outcomes in Fetal Alcohol
- 26 Syndrome and Fetal Alcohol Effects. *J Dev Behav Pediatr* 2004;25(4):228-38. doi: 10.1097/00004703-
- 27 200408000-00002 [published Online First: 01/08/2004]
- 28 92. Popova S, Lange S, Burd L, et al. The Economic Burden of Fetal Alcohol Spectrum Disorder in Canada in
- 29 2013. *Alcohol and Alcoholism* 2016;51(3):367-75. doi: 10.1093/alcalc/agg117
- 30 93. Popova S, Stade B, Bekmuradov D, et al. What Do We Know about the Economic Impact of Fetal Alcohol
- 31 Spectrum Disorder? A Systematic Literature Review. *Alcohol Alcohol* 2011;46(4):490-97. doi:
- 32 10.1093/alcalc/agr029 [published Online First: 22/04/2011]
- 33 94. Reid N. Fetal alcohol spectrum disorder in Australia: What is the current state of affairs? *Drug Alcohol Rev*
- 34 2018;37(7):827-30. doi: 10.1111/dar.12855 [published Online First: 15/08/2018]
- 35 95. Wynn A, Rotheram-Borus MJ, Davis E, et al. Identifying fetal alcohol spectrum disorder among South
- 36 African children at aged 1 and 5 years. *J Alcohol Drug Depend* 2020;217:108266. doi:
- 37 <https://doi.org/10.1016/j.drugalcdep.2020.108266> [published Online First: 30/08/2020]
- 38 96. Reid N, Shelton D, Warner J, et al. Profile of children diagnosed with a fetal alcohol spectrum disorder: A
- 39 retrospective chart review. *Drug Alcohol Rev* 2017;36(5):677-81. doi: 10.1111/dar.12519 [published
- 40 Online First: 23/03/2017]
- 41 97. Bower C, Watkins RE, Mutch RC, et al. Fetal alcohol spectrum disorder and youth justice: a prevalence
- 42 study among young people sentenced to detention in Western Australia. *BMJ Open* 2018;8(2):e019605.
- 43 doi: 10.1136/bmjopen-2017-019605 [published Online First: 31/02/2018]
- 44 98. Fitzpatrick JP, Latimer J, Carter M, et al. Prevalence of fetal alcohol syndrome in a population-based sample
- 45 of children living in remote Australia: the Lililwan Project. *J Paediatr Child Health* 2015;51(4):450-7.
- 46 doi: 10.1111/jpc.12814 [published Online First: 2015/01/17]
- 47 99. Lange S, Probst C, Gmel G, et al. Global Prevalence of Fetal Alcohol Spectrum Disorder Among Children
- 48 and Youth: A Systematic Review and Meta-analysis. *JAMA Pediatr* 2017;171(10):948-56. doi:
- 49 10.1001/jamapediatrics.2017.1919 [published Online First: 21/08/2017]
- 50 100. Williamson A, Gibberd A, Hanly MJ, et al. Social and emotional developmental vulnerability at age five in
- 51 Aboriginal and non-Aboriginal children in New South Wales: a population data linkage study. *Int J*
- 52 *Equity Health* 2019;18(1):120. doi: 10.1186/s12939-019-1019-x [published Online First: 31/07/2019]
- 53 101. von Elm E, Altman DG, Egger M, et al. The Strengthening the Reporting of Observational Studies in
- 54 Epidemiology (STROBE) statement: guidelines for reporting observational studies. *The Lancet*
- 55 2007;370(9596):1453-57. doi: 10.1016/S0140-6736(07)61602-X [published Online First: 20/10/2007]
- 56 102. Popova S, Lange S, Shield K, et al. Prevalence of fetal alcohol spectrum disorder among special
- 57 subpopulations: a systematic review and meta-analysis. *Addiction* 2019;114(7):1150-72. doi:
- 58 10.1111/add.14598 [published Online First: 2019/04/29]
- 59 103. Spittle AJ, Olsen J, Kwong A, et al. The Baby Moves prospective cohort study protocol: using a
- 60 smartphone application with the General Movements Assessment to predict neurodevelopmental
- outcomes at age 2 years for extremely preterm or extremely low birthweight infants. *BMJ Open*
- 2016;6(10):e013446. doi: 10.1136/bmjopen-2016-013446 [published Online First: 2016/10/05]

- 1  
2  
3 104. Einspieler C, Bos AF, Kriebler-Tomantschger M, et al. Cerebral Palsy: Early Markers of Clinical Phenotype  
4 and Functional Outcome. *J Clin Med* 2019;8(10) doi: 10.3390/jcm8101616 [published Online First:  
5 25/08/2019]
- 6 105. Olsen JE, Cheong JLY, Eeles AL, et al. Early general movements are associated with developmental  
7 outcomes at 4.5–5 years. *Early Hum Dev* 2020;148:105115. doi:  
8 <https://doi.org/10.1016/j.earlhumdev.2020.105115> [published Online First: 20/06/2020]
- 9 106. Phagava H, Muratori F, Einspieler C, et al. General movements in infants with autism spectrum disorders.  
10 *Georgian Med News* 2008; (156). <https://europepmc.org/article/med/18403821> (accessed 08/08/2020).
- 11 107. Kwong AKL, Olsen JE, Eeles AL, et al. Occurrence of and temporal trends in fidgety general movements  
12 in infants born extremely preterm/extremely low birthweight and term-born controls. *Early Hum Dev*  
13 2019;135:11-15. doi: <https://doi.org/10.1016/j.earlhumdev.2019.05.018> [published Online First:  
14 08/06/2019]
- 15 108. Bruggink JL, Cioni G, Einspieler C, et al. Early motor repertoire is related to level of self-mobility in  
16 children with cerebral palsy at school age. *Dev Med Child Neurol* 2009;51(11):878-85. doi:  
17 10.1111/j.1469-8749.2009.03294.x [published Online First: 2009/05/07]
- 18 109. Yang H, Einspieler C, Shi W, et al. Cerebral palsy in children: movements and postures during early  
19 infancy, dependent on preterm vs. full term birth. *Early Hum Dev* 2012;88(10):837-43. doi:  
20 10.1016/j.earlhumdev.2012.06.004 [published Online First: 2012/07/17]
- 21 110. Bruggink JLM, Einspieler C, Butcher PR, et al. Quantitative aspects of the early motor repertoire in  
22 preterm infants: Do they predict minor neurological dysfunction at school age? *Early Hum Dev*  
23 2009;85(1):25-36. doi: 10.1016/j.earlhumdev.2008.05.010 [published Online First: 08/08/2008]
- 24 111. Butcher PR, Van Braeckel K, Bouma A, et al. The quality of preterm infants' spontaneous movements: an  
25 early indicator of intelligence and behaviour at school age. *J Child Psychol and Psychiatry*  
26 2009;50(8):920-30. doi: 10.1111/j.1469-7610.2009.02066.x [published Online First: 16/07/2009]
- 27 112. Fjørtoft T, Grunewaldt KH, Løhaugen GCC, et al. Assessment of motor behaviour in high-risk-infants at 3  
28 months predicts motor and cognitive outcomes in 10 years old children. *Early Hum Dev*  
29 2013;89(10):787-93. doi: <https://doi.org/10.1016/j.earlhumdev.2013.06.007> [published Online First:  
30 11/07/2013]
- 31 113. Haataja L, Mercuri E, Regev R, et al. Optimality score for the neurologic examination of the infant at 12  
32 and 18 months of age. *J Pediatr* 1999;135(2):153-61. doi: 10.1016/S0022-3476(99)70016-8 [published  
33 Online First: 4/11/2005]
- 34 114. Romeo DM, Ricci D, Brogna C, et al. Use of the Hammersmith Infant Neurological Examination in infants  
35 with cerebral palsy: a critical review of the literature. *Dev Med Child Neurol* 2016;58:240-45. doi:  
36 10.1111/dmcn.12876 [published Online First: 25/08/2015]
- 37 115. Shanley DC, Hawkins E, Page M, et al. Protocol for the Yapatjarrathati project: a mixed-method  
38 implementation trial of a tiered assessment process for identifying fetal alcohol spectrum disorders in a  
39 remote Australian community. *BMC Health Serv Res* 2019;19(1):649. doi: 10.1186/s12913-019-4378-5  
40 [published Online First: 09/09/2019]
- 41 116. Reid N, Hawkins E, Liu W, et al. Yarning about fetal alcohol spectrum disorder: Outcomes of a  
42 community-based workshop. *Res Dev Disabil* 2020;108:103810. doi: 10.1016/j.ridd.2020.103810  
43 [published Online First: 20/11/2020]
- 44 117. Khan NZ, Muslima H, Shilpi AB, et al. Validation of rapid neurodevelopmental assessment for 2- to 5-  
45 year-old children in Bangladesh. *Pediatrics* 2013;131(2):e486-e94. doi: 10.1542/peds.2011-2421  
46 [published Online First: 01/02/2013]
- 47 118. Khan NZ, Muslima H, El Arifeen S, et al. Validation of a Rapid Neurodevelopmental Assessment Tool for  
48 5 to 9 Year-Old Children in Bangladesh. *J Pediatr* 2014;164(5):1165-70.e6. doi:  
49 10.1016/j.jpeds.2013.12.037 [published Online First: 06/02/2014]
- 50 119. Khan NZ, Muslima H. Rapid Neurodevelopmental Assessment of Children, A Practical Guide for Health  
51 Professionals: Dhaka, Bangladesh: Bangladesh Protibondhi Foundation 2012.
- 52 120. Thompson L, Peñaloza RA, Stormfields K, et al. Validation and adaptation of rapid neurodevelopmental  
53 assessment instrument for infants in Guatemala. *Child Care Health Dev* 2015;41(6):1131-39. doi:  
54 10.1111/cch.12279 [published Online First: 2015/08/06]
- 55 121. Simpson S, D'Aprano A, Tayler C, et al. Validation of a culturally adapted developmental screening tool  
56 for Australian Aboriginal children: Early findings and next steps. *Early Hum Dev* 2016;103:91-95. doi:  
57 <https://doi.org/10.1016/j.earlhumdev.2016.08.005> [published Online First: 19/08/2016]
- 58 122. D'Aprano A, editor. *Ages and Stages Questionnaires Third Edition - Guide to using the ASQ-TRAK*. third  
59 ed: Paul H. Brookes Publishing Co., 2017.
- 60 123. D'Aprano A, Silburn S, Johnston V, et al. Adaptation of the Ages and Stages Questionnaire for Remote  
Aboriginal Australia. *Qual Health Res* 2016;26(5):613-25. doi: 10.1177/1049732314562891 [published  
Online First: 08/12/2014]



- 1  
2  
3 124. D'Aprano A, Silburn S, Johnston V, et al. Culturally Appropriate Training for Remote Australian  
4 Aboriginal Health Workers: Evaluation of an Early Child Development Training Intervention. *J Dev*  
5 *Behav Pediatr* 2015;36(7):503-11. doi: 10.1097/DBP.0000000000000200 [published Online First:  
6 01/09/2015]
- 7 125. Folio M, Fewell R. Peabody Developmental Motor Scales: Examiner's Manual. 2nd edition. Austin, Tex:  
8 PRO-ED, Inc 2000.
- 9 126. Darrach J, Piper M, Watt MJ. Assessment of gross motor skills of at-risk infants: predictive validity of the  
10 Alberta Infant Motor Scale. *Dev Med Child Neurol* 1998;40(7):485-91. doi: 10.1111/j.1469-  
11 8749.1998.tb15399.x [published Online First: 12/11/2008]
- 12 127. Connolly BH, McClune NO, Gatlin R. Concurrent validity of the Bayley-III and the Peabody  
13 Developmental Motor Scale-2. *Pediatr Phys Ther* 2012;24(4):345-52. doi:  
14 10.1097/PEP.0b013e318267c5cf [published Online First: 2012/09/12]
- 15 128. Kolobe TH, Palisano RJ, Stratford PW. Comparison of two outcome measures for infants with cerebral  
16 palsy and infants with motor delays. *Physical therapy* 1998;78(10):1062-72. doi:  
17 10.1093/ptj/78.10.1062 [published Online First: 1998/10/22]
- 18 129. Palisano RJ, Kolobe TH, Haley SM, et al. Validity of the Peabody Developmental Gross Motor Scale as an  
19 evaluative measure of infants receiving physical therapy. *Physical therapy* 1995;75(11):939-48;  
20 discussion 48-51. doi: 10.1093/ptj/75.11.939 [published Online First: 1995/11/01]
- 21 130. Hsiang-Hui W, Hua-Fang L, Ching-Lin H. Reliability, Sensitivity to Change, and Responsiveness of the  
22 Peabody Developmental Motor Scales-Second Edition for Children With Cerebral Palsy. *Physical*  
23 *therapy* 2006;86(10):1351-9. doi: 10.2522/ptj.20050259 [published Online First: 01/10/2006]
- 24 131. Bayley N. Bayley scales of infant and toddler development: PsychCorp, Pearson 2006.
- 25 132. Bode MM, D'Eugenio DB, Mettelman BB, et al. Predictive validity of the Bayley, Third Edition at 2 years  
26 for intelligence quotient at 4 years in preterm infants. *J Dev Behav Pediatr* 2014;35(9):570-5. doi:  
27 10.1097/dbp.0000000000000110 [published Online First: 2014/11/06]
- 28 133. Visser L, Ruiter SAJ, Van der Meulen BF, et al. Validity and suitability of the Bayley-III Low  
29 Motor/Vision version: A comparative study among young children with and without motor and/or  
30 visual impairments. *Res Dev Disabil* 2013;34(11):3736-45. doi:  
31 <https://doi.org/10.1016/j.ridd.2013.07.027> [published Online First: 08/09/2013]
- 32 134. Bayley N, Aylward G. Bayley scales of infant and toddler development 4th ed. San Antonio: Harcourt  
33 2019.
- 34 135. Elliott C, Alexander C, Salt A, et al. Early Moves: a protocol for a population-based prospective cohort  
35 study to establish general movements as an early biomarker of cognitive impairment in infants. *BMJ*  
36 *Open* 2021;11(4):e041695. doi: 10.1136/bmjopen-2020-041695 [published Online First: 09/04/2021]
- 37 136. Spittle AJ, Doyle LW, Boyd RN. A systematic review of the clinimetric properties of neuromotor  
38 assessments for preterm infants during the first year of life. *Dev Med Child Neurol* 2008;50(4):254-66.  
39 doi: 10.1111/j.1469-8749.2008.02025.x [published Online First: 08/01/2008]
- 40 137. Haley S, Coster W, Dumas H, et al. Accuracy and precision of the Pediatric Evaluation of Disability  
41 Inventory computer-adaptive tests (PEDI-CAT). *Dev Med Child Neurol* 2011;53(12):1100-6. doi:  
42 10.1111/j.1469-8749.2011.04107.x [published Online First: 11/11/2011]
- 43 138. Dumas H, Fragala-Pinkham M, Haley S, et al. Item Bank Development for a Revised Pediatric Evaluation  
44 of Disability Inventory (PEDI). *Phys Occup Ther Pediatr* 2010;30(3):168-84. doi:  
45 10.3109/01942631003640493 [published Online First: 07/07/2010]
- 46 139. Shore BJ, Allar BG, Miller PE, et al. Evaluating the Discriminant Validity of the Pediatric Evaluation of  
47 Disability Inventory: Computer Adaptive Test in Children With Cerebral Palsy. *Physical therapy*  
48 2017;97(6):669-76. doi: 10.1093/ptj/pzx033 [published Online First: 2017/04/06]
- 49 140. Ziviani J, Ottenbacher KJ, Shephard K, et al. Concurrent Validity of the Functional Independence Measure  
50 for Children (WeeFIM<sup>TM</sup>) and the Pediatric Evaluation of Disabilities Inventory in Children with  
51 Developmental Disabilities and Acquired Brain Injuries. *Phys Occup Ther Pediatr* 2002;21(2-3):91-  
52 101. doi: 10.1080/J006v21n02\_08 [published Online First: 29/07/2009]
- 53 141. Dumas HM, Fragala-Pinkham MA, Haley SM, et al. Computer adaptive test performance in children with  
54 and without disabilities: prospective field study of the PEDI-CAT. *Disabil Rehabil* 2012;34(5):393-  
55 401. doi: 10.3109/09638288.2011.607217 [published Online First: 2011/10/13]
- 56 142. National Disability Insurance Agency. Providing evidence of disability for children 2021 [updated  
57 22/02/2021. Available from: [https://www.ndis.gov.au/applying-access-ndis/how-apply/information-](https://www.ndis.gov.au/applying-access-ndis/how-apply/information-support-your-request/providing-evidence-disability-children)  
58 [support-your-request/providing-evidence-disability-children](https://www.ndis.gov.au/applying-access-ndis/how-apply/information-support-your-request/providing-evidence-disability-children) accessed 03/03/2021.
- 59 143. Dumas HM, Fragala-Pinkham MA, Rosen EL, et al. Pediatric Evaluation of Disability Inventory Computer  
60 Adaptive Test (PEDI-CAT) and Alberta Infant Motor Scale (AIMS): Validity and Responsiveness.  
61 *Physical therapy* 2015;95(11):1559-68. doi: 10.2522/ptj.20140339 [published Online First:  
62 28/05/2015]

- 1  
2  
3  
4  
5  
6  
7  
8  
9  
10  
11  
12  
13  
14  
15  
16  
17  
18  
19  
20  
21  
22  
23  
24  
25  
26  
27  
28  
29  
30  
31  
32  
33  
34  
35  
36  
37  
38  
39  
40  
41  
42  
43  
44  
45  
46  
47  
48  
49  
50  
51  
52  
53  
54  
55  
56  
57  
58  
59  
60
144. Carter A, Briggs-Gowan M. ITSEA: Infant-Toddler Social and Emotional Assessment. Massachusetts: PsychCorp 2006.
  145. Sanner N, Smith L, Wentzel-Larsen T, et al. Early identification of social–emotional problems: Applicability of the Infant-Toddler Social Emotional Assessment (ITSEA) at its lower age limit. *Infant behavior & development* 2016;42:69-85. doi: 10.1016/j.infbeh.2015.11.001 [published Online First: 17/12/2015]
  146. Carter AS, Briggs-Gowan MJ, Jones SM, et al. The Infant–Toddler Social and Emotional Assessment (ITSEA): Factor Structure, Reliability, and Validity. *Journal of Abnormal Child Psychology* 2003;31(5):495-514. doi: 10.1023/A:1025449031360
  147. McIntyre S, Morgan C, Walker K, et al. Cerebral Palsy—Don't Delay. *Dev Disabil Res Rev* 2011;17(2):114-29. doi: <https://doi.org/10.1002/ddrr.1106> [published Online First: 29/01/2013]
  148. Surveillance of Cerebral Palsy in Europe. Surveillance of cerebral palsy in Europe: a collaboration of cerebral palsy surveys and registers. Surveillance of Cerebral Palsy in Europe (SCPE). *Dev Med Child Neurol* 2000;42(12):816-24. doi: 10.1017/s0012162200001511 [published Online First: 2000/12/29]
  149. Smithers-Sheedy H, Badawi N, Blair E, et al. What constitutes cerebral palsy in the twenty-first century? *Dev Med Child Neurol* 2014;56(4):323-8. doi: 10.1111/dmcn.12262 [published Online First: 2013/10/12]
  150. Palisano R, Rosenbaum P, Walter S, et al. Development and reliability of a system to classify gross motor function in children with cerebral palsy. *Dev Med Child Neurol* 1997;39(4):214-23. doi: 10.1111/j.1469-8749.1997.tb07414.x [published Online First: 1997/04/01]
  151. Wood E, Rosenbaum P. The gross motor function classification system for cerebral palsy: a study of reliability and stability over time. *Dev Med Child Neurol* 2000;42(5):292-6. doi: 10.1017/s0012162200000529 [published Online First: 2000/06/16]
  152. Oeffinger DJ, Tytkowski CM, Rayens MK, et al. Gross Motor Function Classification System and outcome tools for assessing ambulatory cerebral palsy: a multicenter study. *Dev Med Child Neurol* 2004;46(5):311-9. doi: 10.1017/s0012162204000519 [published Online First: 2004/05/11]
  153. Palisano RJ, Rosenbaum P, Bartlett D, et al. Content validity of the expanded and revised Gross Motor Function Classification System. *Dev Med Child Neurol* 2008;50(10):744-50. doi: 10.1111/j.1469-8749.2008.03089.x [published Online First: 2008/10/07]
  154. Gorter JW, Rosenbaum PL, Hanna SE, et al. Limb distribution, motor impairment, and functional classification of cerebral palsy. *Dev Med Child Neurol* 2004;46(7):461-7. doi: 10.1017/s0012162204000763 [published Online First: 2004/07/03]
  155. Eliasson AC, Ullenhag A, Wahlström U, et al. Mini-MACS: development of the Manual Ability Classification System for children younger than 4 years of age with signs of cerebral palsy. *Dev Med Child Neurol* 2017;59(1):72-78. doi: 10.1111/dmcn.13162 [published Online First: 2016/06/09]
  156. Bryson S, Zwaigenbaum L. Autism Observation Scale for Infants. In: Patel V, Preedy V, Martin C, eds. Comprehensive guide to autism. 1st ed. New York: Springer-Verlag 2014:299-310.
  157. Georgiades S, Szatmari P, Zwaigenbaum L, et al. A prospective study of autistic-like traits in unaffected siblings of probands with autism spectrum disorder. *JAMA psychiatry* 2013;70(1):42-8. doi: 10.1001/2013.jamapsychiatry.1 [published Online First: 2012/09/05]
  158. Bradley KA, Kivlahan DR, Williams EC. Brief approaches to alcohol screening: practical alternatives for primary care. *J Gen Intern Med* 2009;24(7):881. doi: 10.1007/s11606-009-1014-9 [published Online First: 03/06/2009]
  159. O'Leary CM, Bower C, Zubrick SR, et al. A new method of prenatal alcohol classification accounting for dose, pattern and timing of exposure: improving our ability to examine fetal effects from low to moderate alcohol. *J Epidemiol Community Health* 2010;64(11):956-62. doi: 10.1136/jech.2009.091785 [published Online First: 2009/10/22]
  160. Astley-Hemingway SJ, Bledsoe JM, Brooks A, et al. Comparison of the 4-Digit Code, Canadian 2015, Australian 2016 and Hoyme 2016 fetal alcohol spectrum disorder diagnostic guidelines. *Adv Pediatr Res* 2019;6(2):31. doi: 10.35248/2385-4529.19.6.31 [published Online First: 2019/10/17]
  161. Tsang TW, Laing-Aiken Z, Latimer J, et al. Digital assessment of the fetal alcohol syndrome facial phenotype: reliability and agreement study. *BMJ Paediatr Open* 2017;1(1):e000137. doi: 10.1136/bmjpo-2017-000137 [published Online First: 11/09/2017]
  162. Lovibond SH, Lovibond PF. Manual for the Depression Anxiety Stress Scales. 2nd. Ed. ed. Sydney: Psychology Foundation 1995.
  163. Lovibond PF, Lovibond SH. The structure of negative emotional states: comparison of the Depression Anxiety Stress Scales (DASS) with the Beck Depression and Anxiety Inventories. *Behaviour research and therapy* 1995;33(3):335-43. doi: 10.1016/0005-7967(94)00075-u [published Online First: 1995/03/01]

- 1  
2  
3 164. Brown TA, Chorpita BF, Korotitsch W, et al. Psychometric properties of the Depression Anxiety Stress  
4 Scales (DASS) in clinical samples. *Behaviour research and therapy* 1997;35(1):79-89. doi:  
5 10.1016/s0005-7967(96)00068-x [published Online First: 1997/01/01]  
6 165. Yelland J, Sutherland G, Brown SJ. Postpartum anxiety, depression and social health: findings from a  
7 population-based survey of Australian women. *BMC Public Health* 2010;10(1):771. doi:  
8 10.1186/1471-2458-10-771  
9 166. Bush K, Kivlahan DR, McDonell MB, et al. The AUDIT Alcohol Consumption Questions (AUDIT-C): An  
10 Effective Brief Screening Test for Problem Drinking. *Arch Intern Med* 1998;158(16):1789-95. doi:  
11 10.1001/archinte.158.16.1789 [published Online First: 27/01/1998]  
12 167. Spittle AJ, Ferretti C, Anderson PJ, et al. Improving the outcome of infants born at <30 weeks' gestation - a  
13 randomized controlled trial of preventative care at home. *BMC Pediatrics* 2009;9(1):73. doi:  
14 10.1186/1471-2431-9-73 [published Online First: 03/12/2009]  
15 168. Roberts G, Howard K, Spittle AJ, et al. Rates of early intervention services in very preterm children with  
16 developmental disabilities at age 2 years. *J Paediatr Child Health* 2008;44(5):276-80. doi:  
17 10.1111/j.1440-1754.2007.01251.x [published Online First: 12/11/2007]  
18 169. StataCorp LLC. Stata Statistical Software: Release 16 College Station, TX: StataCorp LLC; 2019  
19 [Available from: <https://www.stata.com/> accessed 10/12/2020.  
20  
21  
22  
23  
24  
25  
26  
27  
28  
29  
30  
31  
32  
33  
34  
35  
36  
37  
38  
39  
40  
41  
42  
43  
44  
45  
46  
47  
48  
49  
50  
51  
52  
53  
54  
55  
56  
57  
58  
59  
60

1  
2  
3  
4  
5  
6  
7  
8  
9  
10  
11  
12  
13  
14  
15  
16  
17  
18  
19  
20  
21  
22  
23  
24  
25  
26  
27  
28  
29  
30  
31  
32  
33  
34  
35  
36  
37  
38  
39  
40  
41  
42  
43  
44  
45  
46  
47  
48  
49  
50  
51  
52  
53  
54  
55  
56  
57  
58  
59  
60

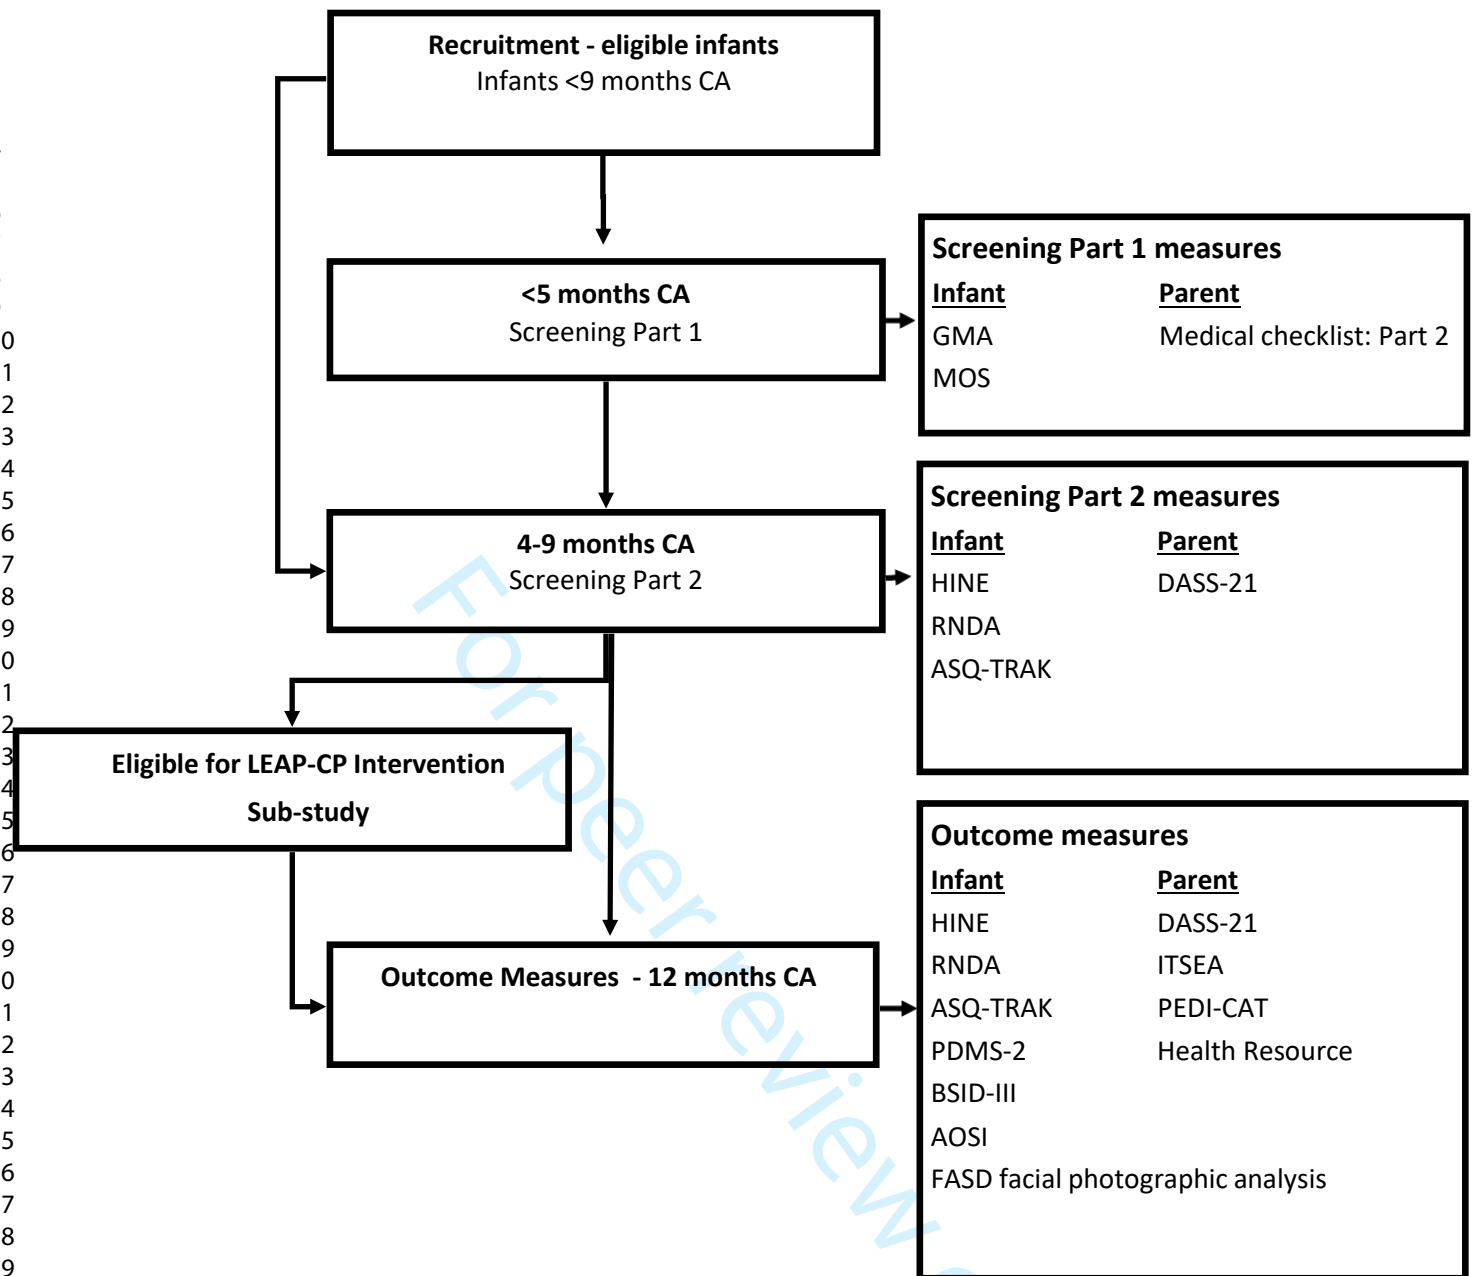

**Figure 1:** LEAP-CP prospective cohort study timeline

Key: GMA= Prechtl’s General Movements Assessment, MOS= General Movements Assessment Motor Optimality Score, HINE= Hammersmith Infant Neurological Examination, RNDA= Rapid Neurodevelopmental Assessment, ASQ-TRAK= Ages and Stages Questionnaire-Aboriginal Adaptation, PMDS-2= Peabody Developmental Motor Scales 2<sup>nd</sup> Edition, BSID-III= Bayley Scales of Infant Development 3<sup>rd</sup> Edition, PEDI-CAT= Pediatric Evaluation of Disability Inventory - computer adaptive test, AOSI= Autism Observation Schedule in Infants, FASD facial photographic analysis, DASS-21= Depression Anxiety Stress Scale, ITSEA= Infant Toddler Social Emotional Assessment

## Supplementary Information

### S1: LEAP-CP Medical checklist: Part 1 and 2

Study ID: □□□

Date: □□/□□/□□□□

Form completed by:

Interviewer initials: □□

#### Part 1: Perinatal data and Birth History – collected from Medical record

##### Infant details

|                                       |                                                                                                                                                                                                                                                |
|---------------------------------------|------------------------------------------------------------------------------------------------------------------------------------------------------------------------------------------------------------------------------------------------|
| Estimated date of delivery            |                                                                                                                                                                                                                                                |
| Date of birth                         |                                                                                                                                                                                                                                                |
| Gestational age at birth (weeks.days) |                                                                                                                                                                                                                                                |
| Maternal age at birth                 |                                                                                                                                                                                                                                                |
| Gender                                | <input type="radio"/> Male<br><input type="radio"/> Female<br><input type="radio"/> Indeterminate                                                                                                                                              |
| Multiple Births                       | <input type="radio"/> Singleton<br><input type="radio"/> Twin<br><input type="radio"/> Triplet<br><input type="radio"/> Surviving twin from multiple (eg singleton birth from triplet pregnancy, sibling died in utero or at birth)            |
| Order of birth for multiples          |                                                                                                                                                                                                                                                |
| Birthweight (grams)                   |                                                                                                                                                                                                                                                |
| Apgar at 1 minute                     |                                                                                                                                                                                                                                                |
| Apgar at 5 minutes                    |                                                                                                                                                                                                                                                |
| Resuscitation                         | <input type="radio"/> Nil (includes suction & O2 therapy)<br><input type="radio"/> Minor (bag and mask, CPAP or Hi-flow)<br><input type="radio"/> Major (intubation, CPR, adrenaline)<br><input type="radio"/> Resuscitation data not recorded |

##### Infant complications

|                                                                                    |                                                                                                                                                                                                                                |
|------------------------------------------------------------------------------------|--------------------------------------------------------------------------------------------------------------------------------------------------------------------------------------------------------------------------------|
| Respiratory (tick all that apply)                                                  | <input type="radio"/> No (includes suppl O2 for <4 hrs)<br><input type="radio"/> Requiring ongoing ventilation or CPAP<br><input type="radio"/> Pneumothorax<br><input type="radio"/> Pneumonia<br><input type="radio"/> Other |
| Other respiratory issue please specify                                             |                                                                                                                                                                                                                                |
| Chronic lung disease (O2 and or ventilatory requirement at 36 weeks corrected age) | <input type="radio"/> Yes<br><input type="radio"/> No                                                                                                                                                                          |
| Hypoxic Ischemic Encephalopathy (HIE)                                              | <input type="radio"/> Yes<br><input type="radio"/> No                                                                                                                                                                          |
| Sarnat stage or severity of HIE                                                    | <input type="radio"/> Stage 1 (mild)<br><input type="radio"/> Stage 2 (moderate)<br><input type="radio"/> Stage 3 (severe)                                                                                                     |
| Received cooling                                                                   | <input type="radio"/> Yes<br><input type="radio"/> No                                                                                                                                                                          |
| Patent ductus arteriosus (PDA)                                                     | <input type="radio"/> No<br><input type="radio"/> Yes<br><input type="radio"/> Not documented                                                                                                                                  |
| If yes to PDA, tick all that apply                                                 | <input type="radio"/> No treatment<br><input type="radio"/> Diuretics<br><input type="radio"/> Fluid restriction<br><input type="radio"/> Indomethacin/ibuprofen/paracetamol                                                   |

|                                                            |                                                                                                                                                                                                                                                                                 |
|------------------------------------------------------------|---------------------------------------------------------------------------------------------------------------------------------------------------------------------------------------------------------------------------------------------------------------------------------|
|                                                            | <input type="radio"/> Surgery                                                                                                                                                                                                                                                   |
| NEC                                                        | <input type="radio"/> No<br><input type="radio"/> Suspected (clinical signs, Xrays normal, nil by mouth &/antibiotics <5 days)<br><input type="radio"/> Definite (Xray changes, ≥5 days nil by mouth &/or triple antibiotics &/or surgery)                                      |
| Seizures                                                   | <input type="radio"/> Yes<br><input type="radio"/> No                                                                                                                                                                                                                           |
| Aetiology if known                                         |                                                                                                                                                                                                                                                                                 |
| Surgery                                                    | <input type="radio"/> Yes<br><input type="radio"/> No                                                                                                                                                                                                                           |
| Please specify what surgery (tick all that apply)          | <input type="radio"/> Bowel resection<br><input type="radio"/> Inguinal hernia repair<br><input type="radio"/> Tracheostomy<br><input type="radio"/> PDA ligation<br><input type="radio"/> Rickham's reservoir<br><input type="radio"/> VP shunt<br><input type="radio"/> other |
| Other surgery, please specify                              |                                                                                                                                                                                                                                                                                 |
| Jaundice requiring exchange transfusion                    | <input type="radio"/> Yes<br><input type="radio"/> No                                                                                                                                                                                                                           |
| Major malformation or genetic syndrome                     | <input type="radio"/> Yes<br><input type="radio"/> No                                                                                                                                                                                                                           |
| Please specify                                             |                                                                                                                                                                                                                                                                                 |
| Retinopathy of Prematurity (ROP)                           | <input type="radio"/> No<br><input type="radio"/> Yes, no intervention required<br><input type="radio"/> Yes, received laser therapy<br><input type="radio"/> Yes, received Avastin (brand name for Bevacizumab)<br><input type="radio"/> Not examined                          |
| Left eye: Max stage of ROP as recorded by ophthalmologist  |                                                                                                                                                                                                                                                                                 |
| Right eye: Max stage of ROP as recorded by ophthalmologist |                                                                                                                                                                                                                                                                                 |
| Hearing Screen result                                      | <input type="radio"/> Pass<br><input type="radio"/> Referred for further examination<br><input type="radio"/> Not examined                                                                                                                                                      |
| Referred hearing result                                    |                                                                                                                                                                                                                                                                                 |

***Cranial and MRI findings Ultrasound findings (most severe reported)***

|                                                         |                                                       |
|---------------------------------------------------------|-------------------------------------------------------|
| IVH                                                     | <input type="radio"/> Yes<br><input type="radio"/> No |
| Maximum IVH grade Left                                  |                                                       |
| Maximum IVH grade Right                                 |                                                       |
| Cystic PVL                                              | <input type="radio"/> Yes<br><input type="radio"/> No |
| Please specify any other abnormal neuroimaging findings |                                                       |
| Age at time of CUS/MRI                                  |                                                       |
| Where was the CUS/MRI completed                         |                                                       |

1  
2  
3  
4  
5  
6  
7  
8  
9  
10  
11  
12  
13  
14  
15  
16  
17  
18  
19  
20  
21  
22  
23  
24  
25  
26  
27  
28  
29  
30  
31  
32  
33  
34  
35  
36  
37  
38  
39  
40  
41  
42  
43  
44  
45  
46  
47  
48  
49  
50  
51  
52  
53  
54  
55  
56  
57  
58  
59  
60**Discharge details**

|                                                              |                                                       |
|--------------------------------------------------------------|-------------------------------------------------------|
| LOS in hospital (days)                                       |                                                       |
| NICU<br>SCN<br>Transferred to other hospital                 |                                                       |
| Discharged home on Oxygen                                    | <input type="radio"/> Yes<br><input type="radio"/> No |
| Was the infant receiving any tube feeding on discharge home? | <input type="radio"/> Yes<br><input type="radio"/> No |

**Developmental History**

|                                                        |                                                                                                                                                                                                                                                                                                                                        |
|--------------------------------------------------------|----------------------------------------------------------------------------------------------------------------------------------------------------------------------------------------------------------------------------------------------------------------------------------------------------------------------------------------|
| Complications since birth (please tick all that apply) | <input type="radio"/> CNS infection (eg meningitis/encephalitis)<br><input type="radio"/> Head injury<br><input type="radio"/> Near drowning<br><input type="radio"/> Non-accidental injury<br><input type="radio"/> Tumour<br><input type="radio"/> CVA<br><input type="radio"/> Cerebral malformation<br><input type="radio"/> Other |
| Other, please specify                                  |                                                                                                                                                                                                                                                                                                                                        |

**Maternal details**

|                                                                                    |                                                                                                                                                                                                                                                                                                                                                                                                                                                                                                                                                                                                                                                                                           |
|------------------------------------------------------------------------------------|-------------------------------------------------------------------------------------------------------------------------------------------------------------------------------------------------------------------------------------------------------------------------------------------------------------------------------------------------------------------------------------------------------------------------------------------------------------------------------------------------------------------------------------------------------------------------------------------------------------------------------------------------------------------------------------------|
| Maternal age at delivery                                                           |                                                                                                                                                                                                                                                                                                                                                                                                                                                                                                                                                                                                                                                                                           |
| Mode of delivery                                                                   | <input type="radio"/> Vaginal<br><input type="radio"/> Caesarean – in labour<br><input type="radio"/> Caesarean – not in labour<br><input type="radio"/> Not documented                                                                                                                                                                                                                                                                                                                                                                                                                                                                                                                   |
| Specify Caesarean section                                                          | <input type="radio"/> Elective<br><input type="radio"/> Emergency                                                                                                                                                                                                                                                                                                                                                                                                                                                                                                                                                                                                                         |
| Did the infant have foetal growth restriction?                                     | <input type="radio"/> Yes<br><input type="radio"/> No                                                                                                                                                                                                                                                                                                                                                                                                                                                                                                                                                                                                                                     |
| Did the mother have any of the following medical conditions during this pregnancy? | <input type="radio"/> None<br><input type="radio"/> Pre-eclampsia<br><input type="radio"/> Essential hypertension<br><input type="radio"/> Thrombophilia<br><input type="radio"/> Diabetes - specify<br><input type="radio"/> Epilepsy<br><input type="radio"/> Respiratory - specify<br><input type="radio"/> Renal disease - specify<br><input type="radio"/> Cardiac disease - specify<br><input type="radio"/> Pulmonary - specify<br><input type="radio"/> Red cell isoimmunisation<br><input type="radio"/> Autoimmune disease - specify<br><input type="radio"/> Psychiatric (diagnosed) - specify<br><input type="radio"/> Substance use - specify<br><input type="radio"/> Other |
| Diabetes (please specify)                                                          | <input type="radio"/> Gestational<br><input type="radio"/> Type 1 diabetes<br><input type="radio"/> Type 2 diabetes                                                                                                                                                                                                                                                                                                                                                                                                                                                                                                                                                                       |
| Respiratory (please specify)                                                       |                                                                                                                                                                                                                                                                                                                                                                                                                                                                                                                                                                                                                                                                                           |

|                                                                             |                                                                                                                                                                                                                                                                                                                                                                                                                                                       |
|-----------------------------------------------------------------------------|-------------------------------------------------------------------------------------------------------------------------------------------------------------------------------------------------------------------------------------------------------------------------------------------------------------------------------------------------------------------------------------------------------------------------------------------------------|
| Renal disease (please specify)                                              |                                                                                                                                                                                                                                                                                                                                                                                                                                                       |
| Cardiac disease (please specify)                                            |                                                                                                                                                                                                                                                                                                                                                                                                                                                       |
| Pulmonary (please specify)                                                  |                                                                                                                                                                                                                                                                                                                                                                                                                                                       |
| Autoimmune (please specify)                                                 |                                                                                                                                                                                                                                                                                                                                                                                                                                                       |
| Psychiatric (please specify)                                                |                                                                                                                                                                                                                                                                                                                                                                                                                                                       |
| Substance use (please specify)                                              |                                                                                                                                                                                                                                                                                                                                                                                                                                                       |
| Other (please specify)                                                      |                                                                                                                                                                                                                                                                                                                                                                                                                                                       |
| Antepartum haemorrhage (bleeding after 20 weeks gestation)?                 | <input type="radio"/> Yes<br><input type="radio"/> No                                                                                                                                                                                                                                                                                                                                                                                                 |
| If Yes, specify at what gestation                                           |                                                                                                                                                                                                                                                                                                                                                                                                                                                       |
| Did the mother receive corticosteroids (to enhance foetal lung maturation)? | <input type="radio"/> Yes<br><input type="radio"/> No<br><input type="radio"/> Not documented                                                                                                                                                                                                                                                                                                                                                         |
| Antenatal corticosteroids (number of completed courses; 2 doses = 1 course) | <input type="radio"/> None<br><input type="radio"/> Incomplete (1 dose only)<br><input type="radio"/> 1 course<br><input type="radio"/> 2 courses<br><input type="radio"/> 3 courses<br><input type="radio"/> Information not documented                                                                                                                                                                                                              |
| Did the mother receive any intravenous magnesium sulphate                   | <input type="radio"/> No<br><input type="radio"/> Yes<br><input type="radio"/> Not documented                                                                                                                                                                                                                                                                                                                                                         |
| Duration of ruptured membranes                                              | <input type="radio"/> N/A or no data available<br><input type="radio"/> <24 hours<br><input type="radio"/> ≥24 hours                                                                                                                                                                                                                                                                                                                                  |
| Were antibiotics given?                                                     | <input type="radio"/> No<br><input type="radio"/> Yes<br><input type="radio"/> Not documented                                                                                                                                                                                                                                                                                                                                                         |
| Did any of the following intra &/or post-partum complications occur?        | <input type="radio"/> None<br><input type="radio"/> Intra-partum fever (in mother)<br><input type="radio"/> Preterm labour<br><input type="radio"/> Meconium<br><input type="radio"/> Breech<br><input type="radio"/> Shoulder dystocia<br><input type="radio"/> Delayed cry (>5 minutes after birth)<br><input type="radio"/> Lethargy or seizures within 72 hours of birth<br><input type="radio"/> Cord around neck<br><input type="radio"/> Other |
| Other, please specify                                                       |                                                                                                                                                                                                                                                                                                                                                                                                                                                       |
| Antenatal care                                                              | <input type="radio"/> Yes<br><input type="radio"/> No                                                                                                                                                                                                                                                                                                                                                                                                 |
| Number of visits                                                            |                                                                                                                                                                                                                                                                                                                                                                                                                                                       |



**Medications**

During the last 6 months has your child had medications for...

|                                |                                                    |
|--------------------------------|----------------------------------------------------|
| <b>1. Epilepsy</b>             | <input type="radio"/> Yes <input type="radio"/> No |
| A. Which medication            |                                                    |
| Frequency (per day)            | <input type="checkbox"/> <input type="checkbox"/>  |
| Dosage (per day)               | <input type="checkbox"/> <input type="checkbox"/>  |
| Duration (length of treatment) |                                                    |
| Any adverse effects?           | <input type="radio"/> Yes <input type="radio"/> No |
| B. Which medication            |                                                    |
| Frequency (per day)            | <input type="checkbox"/> <input type="checkbox"/>  |
| Dosage (per day)               | <input type="checkbox"/> <input type="checkbox"/>  |
| Duration (length of treatment) |                                                    |
| Any adverse effects?           | <input type="radio"/> Yes <input type="radio"/> No |
| C. Which medication            |                                                    |
| Frequency (per day)            | <input type="checkbox"/> <input type="checkbox"/>  |
| Dosage (per day)               | <input type="checkbox"/> <input type="checkbox"/>  |
| Duration (length of treatment) |                                                    |
| Any adverse effects?           | <input type="radio"/> Yes <input type="radio"/> No |

|                                |                                                    |
|--------------------------------|----------------------------------------------------|
| <b>2. Saliva control</b>       | <input type="radio"/> Yes <input type="radio"/> No |
| A. Which medication            |                                                    |
| Frequency (per day)            | <input type="checkbox"/> <input type="checkbox"/>  |
| Dosage (per day)               | <input type="checkbox"/> <input type="checkbox"/>  |
| Duration (length of treatment) |                                                    |
| Any adverse effects?           | <input type="radio"/> Yes <input type="radio"/> No |
| B. Which medication            |                                                    |
| Frequency (per day)            | <input type="checkbox"/> <input type="checkbox"/>  |
| Dosage (per day)               | <input type="checkbox"/> <input type="checkbox"/>  |
| Duration (length of treatment) |                                                    |
| Any adverse effects?           | <input type="radio"/> Yes <input type="radio"/> No |

|                                |                                                    |
|--------------------------------|----------------------------------------------------|
| <b>3. Other</b>                | <input type="radio"/> Yes <input type="radio"/> No |
| A. Which medication            |                                                    |
| Frequency (per day)            | <input type="checkbox"/> <input type="checkbox"/>  |
| Dosage (per day)               | <input type="checkbox"/> <input type="checkbox"/>  |
| Duration (length of treatment) |                                                    |
| Any adverse effects?           | <input type="radio"/> Yes <input type="radio"/> No |
| B. Which medication            |                                                    |
| Frequency (per day)            | <input type="checkbox"/> <input type="checkbox"/>  |
| Dosage (per day)               | <input type="checkbox"/> <input type="checkbox"/>  |
| Duration (length of treatment) |                                                    |
| Any adverse effects?           | <input type="radio"/> Yes <input type="radio"/> No |

**Co-morbidities**

|          | Parent question (based on 10Q Screen)*                                                                                                                                   | Formal assessment |
|----------|--------------------------------------------------------------------------------------------------------------------------------------------------------------------------|-------------------|
| Physical | Does your child have any serious delay in sitting, standing or walking? <input type="radio"/> Yes <input type="radio"/> No<br>Does your child have difficulty walking or |                   |

|                                                               |                                                                                                                                                                                                                                                                                                                                              |                                                                                                                                                                                                                                                                                                                                                                                                                                      |
|---------------------------------------------------------------|----------------------------------------------------------------------------------------------------------------------------------------------------------------------------------------------------------------------------------------------------------------------------------------------------------------------------------------------|--------------------------------------------------------------------------------------------------------------------------------------------------------------------------------------------------------------------------------------------------------------------------------------------------------------------------------------------------------------------------------------------------------------------------------------|
|                                                               | using arms or does he/ she have weakness in the arms/ legs? <input type="radio"/> Yes <input type="radio"/> No                                                                                                                                                                                                                               |                                                                                                                                                                                                                                                                                                                                                                                                                                      |
| Epilepsy/ infantile seizures (date of onset) and seizure type | Does your child sometimes have fits, become rigid, or lose consciousness? <input type="radio"/> Yes <input type="radio"/> No                                                                                                                                                                                                                 | Date of onset (from above):<br>Type of seizure (from above):<br>Defined by 2 unprovoked seizures excluding febrile or neonatal seizures<br><input type="radio"/> Generalised or partial<br><input type="radio"/> Generalised – sudden onset of seizures that compromises responsiveness and affects the whole body<br><input type="radio"/> Partial – seizures have focality therefore symptoms reflect onset in 1 part of the brain |
| Visual impairment                                             | Compared with other children, does your child have difficulty seeing, either in the daytime or at night? <input type="radio"/> Yes <input type="radio"/> No                                                                                                                                                                                  | <input type="radio"/> No<br><input type="radio"/> Diagnosed impaired<br><input type="radio"/> Suspected impaired<br><input type="radio"/> Unsure                                                                                                                                                                                                                                                                                     |
| Hearing impairment                                            | Does your child appear to have difficulty hearing? <input type="radio"/> Yes <input type="radio"/> No                                                                                                                                                                                                                                        | <input type="radio"/> No<br><input type="radio"/> Diagnosed impaired<br><input type="radio"/> Suspected impaired<br><input type="radio"/> Unsure                                                                                                                                                                                                                                                                                     |
| Intellectual impairment                                       | Does your child learn to do things like other children his/ her age? <input type="radio"/> Yes <input type="radio"/> No<br><br>Compared with other children of his/ her age, does your child appear in any way mentally backward, dull or slow? <input type="radio"/> Yes <input type="radio"/> No                                           | <input type="radio"/> No<br><input type="radio"/> Diagnosed impaired<br><input type="radio"/> Suspected impaired<br><input type="radio"/> Unsure                                                                                                                                                                                                                                                                                     |
| Communication impairment                                      | When you tell your child to do something, does he/ she seem to understand what you are saying? <input type="radio"/> Yes <input type="radio"/> No<br><br>Does your child speak at all? <input type="radio"/> Yes <input type="radio"/> No<br><br>Can your child name at least one object? <input type="radio"/> Yes <input type="radio"/> No | <input type="radio"/> No<br><input type="radio"/> Diagnosed impaired<br><input type="radio"/> Suspected impaired<br><input type="radio"/> Unsure                                                                                                                                                                                                                                                                                     |

\*10 Question Screen is a standardised parent-reported measure. Please ask these questions verbatim.

**Part 2: Socio-demographic information****Household Characteristics**

|                                                                                                                                                                             |                                                                                                                                                                                                                                              |                                   |                                   |                                   |                                   |
|-----------------------------------------------------------------------------------------------------------------------------------------------------------------------------|----------------------------------------------------------------------------------------------------------------------------------------------------------------------------------------------------------------------------------------------|-----------------------------------|-----------------------------------|-----------------------------------|-----------------------------------|
| Family pedigree (3 generations)<br><br>* Note this is not completed if biological caregiver is not involved and information is not recorded in the infant's medical record. | Any evidence of illness in the family; any problems with development or intellect; presence of motor disorder, congenital deformity, decreased motor function over time, in-utero/death, disease; cousin marriage, sudden/ unexplained death |                                   |                                   |                                   |                                   |
| Family structure                                                                                                                                                            | 2 caregivers (nuclear)                                                                                                                                                                                                                       | Separated parents dual custody    | Cared for by other intact family  | Single caregiver                  | Other                             |
| Birth order (of blood siblings)                                                                                                                                             | First born                                                                                                                                                                                                                                   | Second born                       | Third born                        | Fourth born                       | Other (specify)                   |
| Child lives with                                                                                                                                                            | Nuclear family                                                                                                                                                                                                                               | Extended family                   | Step family                       | Kinship care                      | Foster care                       |
| Family members in the house (number)                                                                                                                                        |                                                                                                                                                                                                                                              |                                   |                                   | Adult men                         |                                   |
|                                                                                                                                                                             |                                                                                                                                                                                                                                              |                                   |                                   | Adult women                       |                                   |
|                                                                                                                                                                             |                                                                                                                                                                                                                                              |                                   |                                   | Children <18 years                |                                   |
| Other relatives living close by                                                                                                                                             | Yes / no                                                                                                                                                                                                                                     |                                   |                                   |                                   |                                   |
| Who regularly provides care for the child (multiple times per week)? (select as many as apply, and provide their details)<br>Other (specify):                               | <b>Relationship to child:</b>                                                                                                                                                                                                                | <b>Relationship to child:</b>     | <b>Relationship to child:</b>     | <b>Relationship to child:</b>     | <b>Relationship to child:</b>     |
|                                                                                                                                                                             | Age:<br>Highest education:                                                                                                                                                                                                                   | Age:<br>Highest education:        | Age:<br>Highest education:        | Age:<br>Highest education:        | Age:<br>Highest education:        |
|                                                                                                                                                                             | Occupation:<br>Frequency of care:                                                                                                                                                                                                            | Occupation:<br>Frequency of care: | Occupation:<br>Frequency of care: | Occupation:<br>Frequency of care: | Occupation:<br>Frequency of care: |
| Does the infant's biological mother/father identify as                                                                                                                      | Aboriginal                                                                                                                                                                                                                                   | Torres Strait Islander            |                                   |                                   |                                   |
| Primary language(s) spoken at home                                                                                                                                          | English only                                                                                                                                                                                                                                 | Some English                      | No English                        | Specify language(s):              |                                   |
| Where family traditionally from?                                                                                                                                            |                                                                                                                                                                                                                                              |                                   |                                   |                                   |                                   |
| Current postcode                                                                                                                                                            |                                                                                                                                                                                                                                              |                                   |                                   |                                   |                                   |
| Distance to town (corner store)                                                                                                                                             | <input type="checkbox"/> <input type="checkbox"/> <input type="checkbox"/> minutes (in car)                                                                                                                                                  |                                   |                                   |                                   |                                   |

**Employment**

|                                                  |                  |                   |                     |                |        |       |
|--------------------------------------------------|------------------|-------------------|---------------------|----------------|--------|-------|
| Who are the main earners/ workers in the family? | Grandfather      | Grandmother       | Father              | Uncle          | Mother | Other |
| Main earners' occupation/s                       |                  |                   |                     |                |        |       |
| Main earner's employment                         | Fulltime/ secure | Part-time/ casual | Unemployed/ pension | Fly in fly out |        |       |
| Does ill-health often prevent them from working? | Y                |                   | N                   |                | NA     |       |

**Alcohol use in early pregnancy (AUDIT-C)\***

|                                                                                                              |                                                                                                                                                                                                                                                            |
|--------------------------------------------------------------------------------------------------------------|------------------------------------------------------------------------------------------------------------------------------------------------------------------------------------------------------------------------------------------------------------|
| Was the pregnancy planned or unplanned?                                                                      | <input type="radio"/> Planned <input type="radio"/> Unplanned <input type="radio"/> Unknown                                                                                                                                                                |
| At what gestation did the mother realise she was pregnant?                                                   | Weeks<br><input type="radio"/> Unknown                                                                                                                                                                                                                     |
| Did the birth mother drink alcohol before the pregnancy was confirmed?                                       | <input type="radio"/> No <input type="radio"/> Yes <input type="radio"/> Unknown                                                                                                                                                                           |
| Did the birth mother modify her drinking behaviour on confirmation of pregnancy?                             | <input type="radio"/> Yes <input type="radio"/> No <input type="radio"/> Unknown                                                                                                                                                                           |
| During which trimesters was alcohol consumed, tick all that apply                                            | <input type="radio"/> None<br><input type="radio"/> 1st<br><input type="radio"/> 2nd<br><input type="radio"/> 3rd<br><input type="radio"/> Unknown                                                                                                         |
| 1. How often did the birth mother have a drink containing alcohol during this pregnancy?                     | <input type="radio"/> Unknown<br><input type="radio"/> Never (skip Qn 2 & 3)<br><input type="radio"/> monthly or less<br><input type="radio"/> 2-4 times a month<br><input type="radio"/> 2-3 times a week<br><input type="radio"/> 4 or more times a week |
| 2. How many standard drinks did the birth mother have on a typical day when she was drinking this pregnancy? | <input type="radio"/> Unknown<br><input type="radio"/> 1 or 2<br><input type="radio"/> 3 or 4<br><input type="radio"/> 5 or 6<br><input type="radio"/> 7 to 9<br><input type="radio"/> 10 or more                                                          |
| 3. How often did the birth mother have 5 or more standard drinks on one occasion during this pregnancy?      | <input type="radio"/> Unknown<br><input type="radio"/> Never<br><input type="radio"/> Less than monthly<br><input type="radio"/> Monthly<br><input type="radio"/> Weekly<br><input type="radio"/> Daily or almost daily                                    |

\* Note this is not completed if biological caregiver is not involved and information is not recorded in the infant's medical record.

## S2: LEAP- CP (Learning through Everyday Activities with Parents) – 12-Month Medical Assessment- Differential Diagnosis

Study ID: □□□

Date: □□/□□/□□□□

Completed by:

|                                                                  |                                                  |                  |
|------------------------------------------------------------------|--------------------------------------------------|------------------|
| Child's name                                                     |                                                  |                  |
| Corrected Age at assessment                                      |                                                  |                  |
| Weight                                                           | kg /                                             | percentile       |
| Height                                                           | cm /                                             | percentile       |
| Head Circumference                                               | cm /                                             | percentile       |
| <b>Visual impairment</b><br>(without correction, on both eyes)   | Not assessed =0                                  |                  |
|                                                                  | Normal/No visual impairment =1                   |                  |
|                                                                  | Squint =2                                        |                  |
|                                                                  | Impaired =3                                      |                  |
|                                                                  | Severely impaired (blind or no useful vision) =4 |                  |
| <b>Hearing impairment</b> (before correction, on the better ear) | Not assessed =0                                  |                  |
|                                                                  | Normal =1                                        |                  |
|                                                                  | Impaired =2                                      |                  |
|                                                                  | Severely impaired (hearing loss > 70 dB) =3      |                  |
| <b>General Observation:</b>                                      | No abnormality =0                                | Abnormality=1    |
|                                                                  | Face                                             | 0 1              |
|                                                                  | dysmorphism                                      | 0 1              |
|                                                                  | general nutritional state                        | 0 1              |
|                                                                  | Body proportions                                 | 0 1              |
|                                                                  | Muscle bulk                                      | 0 1              |
|                                                                  | symmetry                                         | 0 1              |
|                                                                  | tongue fasciculation                             | 0 1              |
|                                                                  | excessive drooling                               | 0 1              |
|                                                                  | other                                            | 0 1              |
| <b>Gait:</b>                                                     | Non ambulant = 0                                 |                  |
|                                                                  | Age appropriate = 1                              |                  |
|                                                                  | Toe walking = 2                                  |                  |
|                                                                  | Asymmetrical gait = 3                            |                  |
|                                                                  |                                                  | <b>Comments:</b> |

### CEREBRAL PALSY

| Motor type          | Primary                        | Secondary                      |
|---------------------|--------------------------------|--------------------------------|
|                     | Spastic =1                     | Spastic =1                     |
|                     | dyskinetic- dystonic =2        | dyskinetic- dystonic =2        |
|                     | dyskinetic- choreoathetotic =3 | dyskinetic- choreoathetotic =3 |
|                     | Hypotonic =4                   | Hypotonic =4                   |
|                     | Ataxic =5                      | Ataxic =5                      |
| <b>Distribution</b> | Bilateral =1 / unilateral =2   | Bilateral =1 / unilateral =2   |
|                     | No of limbs 1 / 2 / 3 / 4      | No of limbs 1 / 2 / 3 / 4      |



### Sentinel Facial Features

Assess for the 3 sentinel facial features of Fetal Alcohol Spectrum Disorder: short palpebral fissure length (2 SD or more below the mean), smooth philtrum (rank 4 or 5 on the Lip-Philtrum guide), and thin upper lip (rank 4 or 5 on the Lip-Philtrum guide).

#### Palpebral Fissure Length (PFL)

| Assessment method                                                                                                            | Right PFL |              | Left PFL |         | Mean PFL |          |
|------------------------------------------------------------------------------------------------------------------------------|-----------|--------------|----------|---------|----------|----------|
|                                                                                                                              | mm        | Z score (SD) | mm       | Z score | mm       | Z score* |
| <input type="checkbox"/> direct measure <input type="checkbox"/> photo analysis                                              |           |              |          |         |          |          |
| <input type="checkbox"/> direct measure <input type="checkbox"/> photo analysis                                              |           |              |          |         |          |          |
| PFL reference chart used: <input type="checkbox"/> Stromland <input type="checkbox"/> Clarren <input type="checkbox"/> Other |           |              |          |         |          |          |

#### Philtrum

| Assessment method                                                               | UW Lip-Philtrum Guide 5-point rank |
|---------------------------------------------------------------------------------|------------------------------------|
| <input type="checkbox"/> direct measure <input type="checkbox"/> photo analysis |                                    |
| <input type="checkbox"/> direct measure <input type="checkbox"/> photo analysis |                                    |
| <input type="checkbox"/> direct measure <input type="checkbox"/> photo analysis |                                    |

#### Upper lip

| Assessment method                                                               | UW Lip-Philtrum Guide 5-point rank |
|---------------------------------------------------------------------------------|------------------------------------|
| <input type="checkbox"/> direct measure <input type="checkbox"/> photo analysis |                                    |
| <input type="checkbox"/> direct measure <input type="checkbox"/> photo analysis |                                    |
| <input type="checkbox"/> direct measure <input type="checkbox"/> photo analysis |                                    |

|                                                                                                                                      |
|--------------------------------------------------------------------------------------------------------------------------------------|
| Lip-Philtrum Guide <sup>†</sup> used: <input type="checkbox"/> Guide 1. Caucasian <input type="checkbox"/> Guide 2. African American |
|--------------------------------------------------------------------------------------------------------------------------------------|

#### Sentinel Facial Features Summary

|                                                                                                                    |
|--------------------------------------------------------------------------------------------------------------------|
| Number of Sentinel Facial Features (PFL 2 SD or more below the mean, philtrum rank 4 or 5, upper lip rank 4 or 5): |
| <input type="checkbox"/> 0 <input type="checkbox"/> 1 <input type="checkbox"/> 2 <input type="checkbox"/> 3        |

#### Functional Neurodevelopmental Domain Summaries

Assess evidence of significant CNS dysfunction due to underlying brain damage. Required evidence includes severe neurodevelopmental impairment (2 SD or more below the mean or < the 3<sup>rd</sup> percentile) in domains of brain function based on standardised psychometric assessment by a qualified professional.

#### 1. Neurological

| Test/subtest name                                                                                                                                          | Age/ Date | Score | %ile/SD | Interpretation |
|------------------------------------------------------------------------------------------------------------------------------------------------------------|-----------|-------|---------|----------------|
|                                                                                                                                                            |           |       |         |                |
|                                                                                                                                                            |           |       |         |                |
|                                                                                                                                                            |           |       |         |                |
|                                                                                                                                                            |           |       |         |                |
|                                                                                                                                                            |           |       |         |                |
|                                                                                                                                                            |           |       |         |                |
|                                                                                                                                                            |           |       |         |                |
|                                                                                                                                                            |           |       |         |                |
|                                                                                                                                                            |           |       |         |                |
| Other information:                                                                                                                                         |           |       |         |                |
|                                                                                                                                                            |           |       |         |                |
| Motor Skills impairment: <input type="checkbox"/> None <input type="checkbox"/> Some <input type="checkbox"/> Severe <input type="checkbox"/> Not assessed |           |       |         |                |

**2. Motor skills**

| Test/subtest name                                                                                                                                          | Age/ Date | Score | %ile/SD | Interpretation |
|------------------------------------------------------------------------------------------------------------------------------------------------------------|-----------|-------|---------|----------------|
|                                                                                                                                                            |           |       |         |                |
|                                                                                                                                                            |           |       |         |                |
|                                                                                                                                                            |           |       |         |                |
|                                                                                                                                                            |           |       |         |                |
|                                                                                                                                                            |           |       |         |                |
|                                                                                                                                                            |           |       |         |                |
|                                                                                                                                                            |           |       |         |                |
|                                                                                                                                                            |           |       |         |                |
|                                                                                                                                                            |           |       |         |                |
|                                                                                                                                                            |           |       |         |                |
| Other information:                                                                                                                                         |           |       |         |                |
|                                                                                                                                                            |           |       |         |                |
| Motor Skills impairment: <input type="checkbox"/> None <input type="checkbox"/> Some <input type="checkbox"/> Severe <input type="checkbox"/> Not assessed |           |       |         |                |

**3. Cognition**

| Test/subtest name                                                                                                                                       | Age/ Date | Score | %ile/SD | Interpretation |
|---------------------------------------------------------------------------------------------------------------------------------------------------------|-----------|-------|---------|----------------|
|                                                                                                                                                         |           |       |         |                |
|                                                                                                                                                         |           |       |         |                |
|                                                                                                                                                         |           |       |         |                |
|                                                                                                                                                         |           |       |         |                |
|                                                                                                                                                         |           |       |         |                |
|                                                                                                                                                         |           |       |         |                |
|                                                                                                                                                         |           |       |         |                |
|                                                                                                                                                         |           |       |         |                |
|                                                                                                                                                         |           |       |         |                |
|                                                                                                                                                         |           |       |         |                |
| Other information:                                                                                                                                      |           |       |         |                |
|                                                                                                                                                         |           |       |         |                |
| Cognition impairment: <input type="checkbox"/> None <input type="checkbox"/> Some <input type="checkbox"/> Severe <input type="checkbox"/> Not assessed |           |       |         |                |

**4. Language  
(Expressive and Receptive)**





**ASD SYMPTOMOLOGY**

| Item                                      | Score                      |                            |                            |                            |                            |
|-------------------------------------------|----------------------------|----------------------------|----------------------------|----------------------------|----------------------------|
| Visual Tracking                           | <input type="checkbox"/> 0 | <input type="checkbox"/> 1 | <input type="checkbox"/> 2 | <input type="checkbox"/> 3 | <input type="checkbox"/> 8 |
| Disengagement of attentions               | <input type="checkbox"/> 0 | <input type="checkbox"/> 1 | <input type="checkbox"/> 2 | <input type="checkbox"/> 3 | <input type="checkbox"/> 8 |
| Orientation to name                       | <input type="checkbox"/> 0 | <input type="checkbox"/> 1 | <input type="checkbox"/> 2 | <input type="checkbox"/> 3 | <input type="checkbox"/> 8 |
| Differential response to facial emotion   | <input type="checkbox"/> 0 | <input type="checkbox"/> 1 | <input type="checkbox"/> 2 | <input type="checkbox"/> 3 | <input type="checkbox"/> 8 |
| Anticipatory social response              | <input type="checkbox"/> 0 | <input type="checkbox"/> 1 | <input type="checkbox"/> 2 | <input type="checkbox"/> 3 | <input type="checkbox"/> 8 |
| Imitation                                 | <input type="checkbox"/> 0 | <input type="checkbox"/> 1 | <input type="checkbox"/> 2 | <input type="checkbox"/> 3 | <input type="checkbox"/> 8 |
| Social Babbling                           | <input type="checkbox"/> 0 | <input type="checkbox"/> 1 | <input type="checkbox"/> 2 | <input type="checkbox"/> 3 | <input type="checkbox"/> 8 |
| Eye Contact                               | <input type="checkbox"/> 0 | <input type="checkbox"/> 1 | <input type="checkbox"/> 2 | <input type="checkbox"/> 3 | <input type="checkbox"/> 8 |
| Reciprocal social smile                   | <input type="checkbox"/> 0 | <input type="checkbox"/> 1 | <input type="checkbox"/> 2 | <input type="checkbox"/> 3 | <input type="checkbox"/> 8 |
| Coordination of eye gaze                  | <input type="checkbox"/> 0 | <input type="checkbox"/> 1 | <input type="checkbox"/> 2 | <input type="checkbox"/> 3 | <input type="checkbox"/> 8 |
| Behavioural Reactivity                    | <input type="checkbox"/> 0 | <input type="checkbox"/> 1 | <input type="checkbox"/> 2 | <input type="checkbox"/> 3 | <input type="checkbox"/> 8 |
| Social interest and shared affect         | <input type="checkbox"/> 0 | <input type="checkbox"/> 1 | <input type="checkbox"/> 2 | <input type="checkbox"/> 3 | <input type="checkbox"/> 8 |
| Transitions                               | <input type="checkbox"/> 0 | <input type="checkbox"/> 1 | <input type="checkbox"/> 2 | <input type="checkbox"/> 3 | <input type="checkbox"/> 8 |
| Motor control                             | <input type="checkbox"/> 0 | <input type="checkbox"/> 1 | <input type="checkbox"/> 2 | <input type="checkbox"/> 3 | <input type="checkbox"/> 8 |
| Atypical motor behaviour                  | <input type="checkbox"/> 0 | <input type="checkbox"/> 1 | <input type="checkbox"/> 2 | <input type="checkbox"/> 3 | <input type="checkbox"/> 8 |
| Engagement of attention                   | <input type="checkbox"/> 0 | <input type="checkbox"/> 1 | <input type="checkbox"/> 2 | <input type="checkbox"/> 3 | <input type="checkbox"/> 8 |
| Insistence on specific objects/activities | <input type="checkbox"/> 0 | <input type="checkbox"/> 1 | <input type="checkbox"/> 2 | <input type="checkbox"/> 3 | <input type="checkbox"/> 8 |
| Sharing Interest                          | <input type="checkbox"/> 0 | <input type="checkbox"/> 1 | <input type="checkbox"/> 2 | <input type="checkbox"/> 3 | <input type="checkbox"/> 8 |
| <b>Total score</b>                        |                            |                            |                            |                            |                            |

|            |       |                     |               |         |
|------------|-------|---------------------|---------------|---------|
| <b>ASD</b> | No =0 | High risk of ASD =1 | Definitely =2 | Unclear |
|------------|-------|---------------------|---------------|---------|

## 12-Month Medical Assessment- Blinded Differential Diagnosis

Study ID: □□□

Date: □□/□□/□□□□

Completed by:

|                                  |                                        |              |                                |         |
|----------------------------------|----------------------------------------|--------------|--------------------------------|---------|
| <b>Cerebral palsy</b>            | No =0                                  | High risk =1 | Definitely =2                  | Unclear |
| <b>Motor type</b>                | <b>Primary</b>                         |              | <b>Secondary</b>               |         |
|                                  | Spastic =1                             |              | Spastic =1                     |         |
|                                  | dyskinetic- dystonic =2                |              | dyskinetic- dystonic =2        |         |
|                                  | dyskinetic- choreoathetotic =3         |              | dyskinetic- choreoathetotic =3 |         |
|                                  | Hypotonic =4                           |              | Hypotonic =4                   |         |
|                                  | Ataxic =5                              |              | Ataxic =5                      |         |
| <b>Distribution</b>              | Bilateral =1 / unilateral =2           |              | Bilateral =1 / unilateral =2   |         |
|                                  | No of limbs 1 / 2 / 3 / 4              |              | No of limbs 1 / 2 / 3 / 4      |         |
| GMFCS level<br>(0-2 years scale) | I =1 / II =2 / III =3 / IV = 4 / V = 5 |              |                                |         |
| MACs level<br>(1-4 year scale)   | I =1 / II =2 / III =3 / IV = 4 / V = 5 |              |                                |         |
| Comments                         |                                        |              |                                |         |

|            |       |                     |               |         |
|------------|-------|---------------------|---------------|---------|
| <b>FAS</b> | No =0 | High risk of FAS =1 | Definitely =2 | Unclear |
| Comments   |       |                     |               |         |

|            |       |                     |               |         |
|------------|-------|---------------------|---------------|---------|
| <b>ASD</b> | No =0 | High risk of ASD =1 | Definitely =2 | Unclear |
| Comments   |       |                     |               |         |

# S3: LEAP – CP Medical and Allied Health Resource Form

Study ID: □□□

Date: □□/□□/□□□□

Form completed by:

Interviewer initials: □□

## Allied Health

During the last 6 months have you received treatment or advice from:

|                         |                                                                                                                                                                                                    |
|-------------------------|----------------------------------------------------------------------------------------------------------------------------------------------------------------------------------------------------|
| <b>1. Physiotherapy</b> | <input type="radio"/> Yes <input type="radio"/> No                                                                                                                                                 |
| Does it emphasise       | <input type="radio"/> Motor learning <input type="radio"/> Equipment <input type="radio"/> Functional therapy <input type="radio"/> Stretching & positioning<br><input type="radio"/> Other: _____ |
| How often               | <input type="checkbox"/> <input type="checkbox"/> Visits per 6 months                                                                                                                              |
| Format                  | <input type="radio"/> Individual <input type="radio"/> Group <input type="radio"/> Home program                                                                                                    |
| Location                | <input type="radio"/> Hospital <input type="radio"/> Community <input type="radio"/> Home <input type="radio"/> Private practice                                                                   |

|                                |                                                                                                                                                                                                    |
|--------------------------------|----------------------------------------------------------------------------------------------------------------------------------------------------------------------------------------------------|
| <b>2. Occupational therapy</b> | <input type="radio"/> Yes <input type="radio"/> No                                                                                                                                                 |
| Does it emphasise              | <input type="radio"/> Motor learning <input type="radio"/> Equipment <input type="radio"/> Functional therapy <input type="radio"/> Stretching & positioning<br><input type="radio"/> Other: _____ |
| How often                      | <input type="checkbox"/> <input type="checkbox"/> Visits per 6 months                                                                                                                              |
| Format                         | <input type="radio"/> Individual <input type="radio"/> Group <input type="radio"/> Home program                                                                                                    |
| Location                       | <input type="radio"/> Hospital <input type="radio"/> Community <input type="radio"/> Home <input type="radio"/> Private practice                                                                   |

|                          |                                                                                                                                                                                                       |
|--------------------------|-------------------------------------------------------------------------------------------------------------------------------------------------------------------------------------------------------|
| <b>3. Speech therapy</b> | <input type="radio"/> Yes <input type="radio"/> No                                                                                                                                                    |
| Does it emphasise        | <input type="radio"/> Speech/ talking <input type="radio"/> Early communication skills (play) <input type="radio"/> Sign/ symbol <input type="radio"/> Mealtime<br><input type="radio"/> Other: _____ |
| How often                | <input type="checkbox"/> <input type="checkbox"/> Visits per 6 months                                                                                                                                 |
| Format                   | <input type="radio"/> Individual <input type="radio"/> Group <input type="radio"/> Home program                                                                                                       |
| Location                 | <input type="radio"/> Hospital <input type="radio"/> Community <input type="radio"/> Home <input type="radio"/> Private practice                                                                      |

|                         |                                                                                                                                  |
|-------------------------|----------------------------------------------------------------------------------------------------------------------------------|
| <b>4. Other</b>         | <input type="radio"/> Yes <input type="radio"/> No                                                                               |
| What does it emphasise? |                                                                                                                                  |
| How often               | <input type="checkbox"/> <input type="checkbox"/> Visits per 6 months                                                            |
| Format                  | <input type="radio"/> Individual <input type="radio"/> Group <input type="radio"/> Home program                                  |
| Location                | <input type="radio"/> Hospital <input type="radio"/> Community <input type="radio"/> Home <input type="radio"/> Private practice |

## Medical

During the last fortnight, has your child been sick?  Yes  (number of days)  No

During the 6 months, has your child had:

|                                 |                                                                                                               |
|---------------------------------|---------------------------------------------------------------------------------------------------------------|
| <b>1. Admission to hospital</b> | <input type="radio"/> Yes <input type="radio"/> No Number of admissions <input type="checkbox"/>              |
| Visit 1                         | Reason:<br>Treatment/ investigation:<br>Length of stay <input type="checkbox"/> <input type="checkbox"/> days |
| Visit 2                         | Reason:<br>Treatment/ investigation:<br>Length of stay <input type="checkbox"/> <input type="checkbox"/> days |
| Visit 3                         | Reason:<br>Treatment/ investigation:<br>Length of stay <input type="checkbox"/> <input type="checkbox"/> days |
| Visit 4                         | Reason:<br>Treatment/ investigation:<br>Length of stay <input type="checkbox"/> <input type="checkbox"/> days |

|                          |                                                                                                    |
|--------------------------|----------------------------------------------------------------------------------------------------|
| <b>2. GP appointment</b> | <input type="radio"/> Yes <input type="radio"/> No Number of appointments <input type="checkbox"/> |
| Visit 1                  | Reason:<br>Treatment/ investigation:                                                               |
| Visit 2                  | Reason:<br>Treatment/ investigation:                                                               |
| Visit 3                  | Reason:<br>Treatment/ investigation:                                                               |

|                                                                                                                               |         |                                      |
|-------------------------------------------------------------------------------------------------------------------------------|---------|--------------------------------------|
| 1<br>2<br>3<br>4<br>5<br>6<br>7<br>8<br>9<br>10<br>11<br>12                                                                   | Visit 4 | Reason:<br>Treatment/ investigation: |
| <b>3. Paediatrician</b> <input type="radio"/> Yes <input type="radio"/> No    Number of appointments <input type="checkbox"/> |         |                                      |
| 13<br>14<br>15<br>16<br>17<br>18<br>19<br>20<br>21<br>22                                                                      | Visit 1 | Reason:<br>Treatment/ investigation: |
|                                                                                                                               | Visit 2 | Reason:<br>Treatment/ investigation: |
|                                                                                                                               | Visit 3 | Reason:<br>Treatment/ investigation: |
|                                                                                                                               | Visit 4 | Reason:<br>Treatment/ investigation: |

|                                                          |                                    |                                                                                                       |
|----------------------------------------------------------|------------------------------------|-------------------------------------------------------------------------------------------------------|
| 13<br>14<br>15<br>16<br>17<br>18<br>19<br>20<br>21<br>22 | <b>4. Other specialist</b><br>Who: | <input type="radio"/> Yes <input type="radio"/> No    Number of appointments <input type="checkbox"/> |
|                                                          | Visit 1                            | Reason:<br>Treatment/ investigation:                                                                  |
|                                                          | Visit 2                            | Reason:<br>Treatment/ investigation:                                                                  |
|                                                          | Visit 3                            | Reason:<br>Treatment/ investigation:                                                                  |
|                                                          | Visit 4                            | Reason:<br>Treatment/ investigation:                                                                  |

|                                                                |                                    |                                                                                                       |
|----------------------------------------------------------------|------------------------------------|-------------------------------------------------------------------------------------------------------|
| 23<br>24<br>25<br>26<br>27<br>28<br>29<br>30<br>31<br>32<br>33 | <b>5. Other specialist</b><br>Who: | <input type="radio"/> Yes <input type="radio"/> No    Number of appointments <input type="checkbox"/> |
|                                                                | Visit 1                            | Reason:<br>Treatment/ investigation:                                                                  |
|                                                                | Visit 2                            | Reason:<br>Treatment/ investigation:                                                                  |
|                                                                | Visit 3                            | Reason:<br>Treatment/ investigation:                                                                  |
|                                                                | Visit 4                            | Reason:<br>Treatment/ investigation:                                                                  |

|                                                          |                                    |                                                                                                       |
|----------------------------------------------------------|------------------------------------|-------------------------------------------------------------------------------------------------------|
| 34<br>35<br>36<br>37<br>38<br>39<br>40<br>41<br>42<br>43 | <b>6. Other specialist</b><br>Who: | <input type="radio"/> Yes <input type="radio"/> No    Number of appointments <input type="checkbox"/> |
|                                                          | Visit 1                            | Reason:<br>Treatment/ investigation:                                                                  |
|                                                          | Visit 2                            | Reason:<br>Treatment/ investigation:                                                                  |
|                                                          | Visit 3                            | Reason:<br>Treatment/ investigation:                                                                  |
|                                                          | Visit 4                            | Reason:<br>Treatment/ investigation:                                                                  |

#### Equipment

Has your child been provided with any equipment:

- Supportive chair/ seating
- Walking aids
- standing frame
- Splints / orthoses
- Wheelchair

#### National Disability Insurance Scheme (NDIS) Funding

|                            |                                            |                                                                                                                                                                            |
|----------------------------|--------------------------------------------|----------------------------------------------------------------------------------------------------------------------------------------------------------------------------|
| 56<br>57<br>58<br>59<br>60 | Does your child have an NDIS plan?         | <input type="radio"/> Yes <input type="radio"/> No                                                                                                                         |
|                            | Is the plan self managed?                  | <input type="radio"/> Yes <input type="radio"/> No                                                                                                                         |
|                            | What are you able to use your funding for? | <input type="radio"/> Therapy (eg physiotherapy, OT)<br><input type="radio"/> Equipment (eg walking aid/ orthoses)<br><input type="radio"/> Consumables (eg feeding tubes) |

**STROBE 2007 (v4) Statement—Checklist of items that should be included in reports of *cohort studies***

| Section/Topic                | Item # | Recommendation                                                                                                                                                                       | Reported on page # |
|------------------------------|--------|--------------------------------------------------------------------------------------------------------------------------------------------------------------------------------------|--------------------|
| <b>Title and abstract</b>    | 1      | (a) Indicate the study's design with a commonly used term in the title or the abstract                                                                                               | 1 and 2            |
|                              |        | (b) Provide in the abstract an informative and balanced summary of what was done and what was found                                                                                  | 2                  |
| <b>Introduction</b>          |        |                                                                                                                                                                                      |                    |
| Background/rationale         | 2      | Explain the scientific background and rationale for the investigation being reported                                                                                                 | 3-7                |
| Objectives                   | 3      | State specific objectives, including any prespecified hypotheses                                                                                                                     | 7-9                |
| <b>Methods</b>               |        |                                                                                                                                                                                      |                    |
| Study design                 | 4      | Present key elements of study design early in the paper                                                                                                                              | 9                  |
| Setting                      | 5      | Describe the setting, locations, and relevant dates, including periods of recruitment, exposure, follow-up, and data collection                                                      | 9-13               |
| Participants                 | 6      | (a) Give the eligibility criteria, and the sources and methods of selection of participants. Describe methods of follow-up                                                           | 10-13              |
|                              |        | (b) For matched studies, give matching criteria and number of exposed and unexposed                                                                                                  |                    |
| Variables                    | 7      | Clearly define all outcomes, exposures, predictors, potential confounders, and effect modifiers. Give diagnostic criteria, if applicable                                             | 10, 13-20,         |
| Data sources/<br>measurement | 8*     | For each variable of interest, give sources of data and details of methods of assessment (measurement). Describe comparability of assessment methods if there is more than one group | 13-20              |
| Bias                         | 9      | Describe any efforts to address potential sources of bias                                                                                                                            | 21                 |
| Study size                   | 10     | Explain how the study size was arrived at                                                                                                                                            | 10-11              |
| Quantitative variables       | 11     | Explain how quantitative variables were handled in the analyses. If applicable, describe which groupings were chosen and why                                                         | 20-21              |
| Statistical methods          | 12     | (a) Describe all statistical methods, including those used to control for confounding                                                                                                | 20                 |
|                              |        | (b) Describe any methods used to examine subgroups and interactions                                                                                                                  | 20                 |
|                              |        | (c) Explain how missing data were addressed                                                                                                                                          |                    |
|                              |        | (d) If applicable, explain how loss to follow-up was addressed                                                                                                                       |                    |
|                              |        | (e) Describe any sensitivity analyses                                                                                                                                                | 20                 |
| <b>Results</b>               |        |                                                                                                                                                                                      |                    |

|                          |     |                                                                                                                                                                                                                                                                                                                                                                                                               |    |
|--------------------------|-----|---------------------------------------------------------------------------------------------------------------------------------------------------------------------------------------------------------------------------------------------------------------------------------------------------------------------------------------------------------------------------------------------------------------|----|
| Participants             | 13* | (a) Report numbers of individuals at each stage of study—eg numbers potentially eligible, examined for eligibility, confirmed eligible, included in the study, completing follow-up, and analysed<br>(b) Give reasons for non-participation at each stage<br>(c) Consider use of a flow diagram                                                                                                               | 9  |
| Descriptive data         | 14* | (a) Give characteristics of study participants (eg demographic, clinical, social) and information on exposures and potential confounders<br>(b) Indicate number of participants with missing data for each variable of interest<br>(c) Summarise follow-up time (eg, average and total amount)                                                                                                                | 20 |
| Outcome data             | 15* | Report numbers of outcome events or summary measures over time                                                                                                                                                                                                                                                                                                                                                |    |
| Main results             | 16  | (a) Give unadjusted estimates and, if applicable, confounder-adjusted estimates and their precision (eg, 95% confidence interval). Make clear which confounders were adjusted for and why they were included<br>(b) Report category boundaries when continuous variables were categorized<br>(c) If relevant, consider translating estimates of relative risk into absolute risk for a meaningful time period | 20 |
| Other analyses           | 17  | Report other analyses done—eg analyses of subgroups and interactions, and sensitivity analyses                                                                                                                                                                                                                                                                                                                | 20 |
| <b>Discussion</b>        |     |                                                                                                                                                                                                                                                                                                                                                                                                               |    |
| Key results              | 18  | Summarise key results with reference to study objectives                                                                                                                                                                                                                                                                                                                                                      |    |
| <b>Limitations</b>       |     |                                                                                                                                                                                                                                                                                                                                                                                                               |    |
| Interpretation           | 20  | Give a cautious overall interpretation of results considering objectives, limitations, multiplicity of analyses, results from similar studies, and other relevant evidence                                                                                                                                                                                                                                    |    |
| Generalisability         | 21  | Discuss the generalisability (external validity) of the study results                                                                                                                                                                                                                                                                                                                                         |    |
| <b>Other information</b> |     |                                                                                                                                                                                                                                                                                                                                                                                                               |    |
| Funding                  | 22  | Give the source of funding and the role of the funders for the present study and, if applicable, for the original study on which the present article is based                                                                                                                                                                                                                                                 | 24 |

\*Give information separately for cases and controls in case-control studies and, if applicable, for exposed and unexposed groups in cohort and cross-sectional studies.

**Note:** An Explanation and Elaboration article discusses each checklist item and gives methodological background and published examples of transparent reporting. The STROBE checklist is best used in conjunction with this article (freely available on the Web sites of PLoS Medicine at <http://www.plosmedicine.org/>, Annals of Internal Medicine at <http://www.annals.org/>, and Epidemiology at <http://www.epidem.com/>). Information on the STROBE Initiative is available at [www.strobe-statement.org](http://www.strobe-statement.org).

# BMJ Open

## Study Protocol: Early detection of Australian Aboriginal and Torres Strait Islander infants at high risk of adverse neurodevelopmental outcomes at 12 months corrected age: LEAP-CP prospective cohort study

|                                 |                                                                                                                                                                                                                                                                                                                                                                                                                                                                                                                                                                                                                                                                                                                                                                                                                                                                              |
|---------------------------------|------------------------------------------------------------------------------------------------------------------------------------------------------------------------------------------------------------------------------------------------------------------------------------------------------------------------------------------------------------------------------------------------------------------------------------------------------------------------------------------------------------------------------------------------------------------------------------------------------------------------------------------------------------------------------------------------------------------------------------------------------------------------------------------------------------------------------------------------------------------------------|
| Journal:                        | <i>BMJ Open</i>                                                                                                                                                                                                                                                                                                                                                                                                                                                                                                                                                                                                                                                                                                                                                                                                                                                              |
| Manuscript ID                   | bmjopen-2021-053646.R1                                                                                                                                                                                                                                                                                                                                                                                                                                                                                                                                                                                                                                                                                                                                                                                                                                                       |
| Article Type:                   | Protocol                                                                                                                                                                                                                                                                                                                                                                                                                                                                                                                                                                                                                                                                                                                                                                                                                                                                     |
| Date Submitted by the Author:   | 09-Dec-2021                                                                                                                                                                                                                                                                                                                                                                                                                                                                                                                                                                                                                                                                                                                                                                                                                                                                  |
| Complete List of Authors:       | Luke, Carly; The University of Queensland, Queensland Cerebral Palsy and Rehabilitation Research Centre; Townsville Hospital and Health Service, Allied Health Women's and Families Service<br>Benfer, Katherine; The University of Queensland, Queensland Cerebral Palsy and Rehabilitation Research Centre<br>Mick-Ramsamy, Leeann; The University of Queensland, Queensland Cerebral Palsy and Rehabilitation Research Centre<br>Ware, Robert; Griffith University, Menzies Health Institute Queensland<br>Reid, Natasha; The University of Queensland, Child Health Research Centre<br>Bos, Arend; University Medical Centre Groningen, neonatology<br>Bosanquet, Margot; Townsville Hospital and Health Service, Allied Health Women's and Families Service<br>Boyd, Roslyn; The University of Queensland, Queensland Cerebral Palsy and Rehabilitation Research Centre |
| <b>Primary Subject Heading</b>: | Paediatrics                                                                                                                                                                                                                                                                                                                                                                                                                                                                                                                                                                                                                                                                                                                                                                                                                                                                  |
| Secondary Subject Heading:      | Rehabilitation medicine, Neurology                                                                                                                                                                                                                                                                                                                                                                                                                                                                                                                                                                                                                                                                                                                                                                                                                                           |
| Keywords:                       | Developmental neurology & neurodisability < PAEDIATRICS, Paediatric neurology < PAEDIATRICS, Rehabilitation medicine < INTERNAL MEDICINE                                                                                                                                                                                                                                                                                                                                                                                                                                                                                                                                                                                                                                                                                                                                     |
|                                 |                                                                                                                                                                                                                                                                                                                                                                                                                                                                                                                                                                                                                                                                                                                                                                                                                                                                              |

SCHOLARONE™  
Manuscripts



1  
2  
3 **Study Protocol: Early detection of Australian Aboriginal and Torres Strait Islander**  
4 **infants at high risk of adverse neurodevelopmental outcomes at 12 months corrected age:**  
5 **LEAP-CP prospective cohort study**  
6

7 **Authors**

8 Ms Carly Luke, MA Paed Phys Prac, BPT, PhD Scholar, Queensland Cerebral Palsy and  
9 Rehabilitation Research Centre, Child Health Research Centre, The University of  
10 Queensland, Brisbane, Australia;

11 Dr Katherine A Benfer, PhD, BScSPT, MPH, Queensland Cerebral Palsy and Rehabilitation  
12 Research Centre, Child Health Research Centre, The University of Queensland, Brisbane,  
13 Australia;

14 Ms Leeann Mick-Ramsamy, MPH, PhD scholar, Queensland Cerebral Palsy and  
15 Rehabilitation

16 Research Centre, Child Health Research Centre, The University of Queensland, Brisbane,  
17 Australia;

18 Prof Robert Ware, PhD, Menzies Health Institute Queensland, Griffith University, Brisbane,  
19 Australia;

20 Dr Natasha Reid, PhD, B.A (Hons) (Psychology), Queensland Cerebral Palsy and  
21 Rehabilitation Research Centre, Child Health Research Centre, The University of  
22 Queensland, Brisbane, Australia;

23 Prof. Arend F. Bos, MD, PhD, University of Groningen, University Medical Center Groningen,  
24 Beatrix Children's Hospital, Division of Neonatology, Groningen, The Netherlands;

25 Dr. Margot Bosanquet, MD, Allied Health Women's and Families Service, Townsville  
26 University Hospital (TUH), Townsville Hospital and Health Service District (THHS),  
27 Townsville, Australia;

28 Prof. Roslyn N Boyd, PhD, MSc PT, Queensland Cerebral Palsy and Rehabilitation Research  
29 Centre, Child Health Research Centre, The University of Queensland, Brisbane, Australia  
30  
31

32 **Corresponding author:** Ms Carly Luke, Queensland Cerebral Palsy and Rehabilitation  
33 Research Centre, Child Health Research Centre, Level 6 Centre for Children's Health  
34 Research, 62 Graham St, South Brisbane Q 4101 Australia.

35 Email: Carly.Luke@uqconnect.edu.au; Phone: +61 7 30697363

36 **Journal: BMJ Open**

37 **Word Count** (excluding title page, abstract, references, figures and tables): 8,267 words

38 **Number of Figures: 1**

39 **Number of Tables: 1**  
40  
41  
42  
43  
44  
45  
46  
47  
48  
49  
50  
51  
52  
53  
54  
55  
56  
57  
58  
59  
60

## ABSTRACT

**Introduction** Neurodevelopmental disorders (NDD) including; cerebral palsy (CP), autism spectrum disorder (ASD) and fetal alcohol spectrum disorder (FASD), are characterised by impaired development of the early central nervous system, impacting cognitive and/or physical function. Early detection of NDD enables infants to be fast-tracked to early intervention services, optimising outcomes. Aboriginal and Torres Strait Islander infants may experience early life factors increasing their risk of neurodevelopmental vulnerability, which persist into later childhood, further compounding the health inequities experienced by First Nations peoples in Australia.

The LEAP-CP prospective cohort study will investigate the efficacy of early screening programs, implemented in Queensland, Australia to earlier identify Aboriginal and Torres Strait Islander infants who are ‘at risk’ of adverse neurodevelopmental outcomes (NDO) or NDD. Diagnostic accuracy and feasibility of early detection tools for identifying infants ‘at risk’ of a later diagnosis of adverse NDO or NDD will be determined.

**Methods and Analysis** Aboriginal and/ or Torres Strait Islander infants born in Queensland, Australia (birth years 2020-2022) will be invited to participate. Infants aged  $\leq 9$  months corrected age (CA) will undergo screening using the: (i) General Movements Assessment (GMA); (ii) Hammersmith Infant Neurological Examination (HINE); (iii) Rapid Neurodevelopmental Assessment (RNDA) and (iv) Ages and Stages Questionnaire - Aboriginal adaptation (ASQ-TRAK). Developmental outcomes at 12 months CA will be determined for: (i) neurological (HINE); (ii) motor (Peabody Developmental Motor Scales 2); (iii) cognitive and communication (Bayley Scales of Infant Development III); (iv) functional capabilities (Pediatric Evaluation of Disability Inventory - computer adaptive test); and (v) behaviour (Infant Toddler Social and Emotional Assessment). Infants will be classified as typically developing or ‘at risk’ of an adverse NDO and/or specific NDD based on symptomology using developmental and diagnostic outcomes for (i) CP (ii) ASD and (ii) FASD. The effects of perinatal, social and environmental factors, caregiver mental health and clinical neuroimaging on neurodevelopmental outcomes will be investigated.

**Ethics and Dissemination** Ethics approval has been granted by appropriate Queensland ethics committees; Far North Queensland Health Research Ethics Committee (HREC/2019/QCH/50533 (Sep ver 2) - 1370), the Townsville HHS Human Research Ethics Committee (HREC/QTHS/56008), the University of Queensland Medical Research Ethics Committee (2020000185/HREC/2019/QCH/50533), and the Children’s Health Queensland HHS Human Research Ethics Committee (HREC/20/QCHQ/63906) with governance and support from local First Nations communities. Findings from this study will be disseminated via peer-reviewed publications and conference presentations.

**Trial registration number** ACTRN12619000969167

**Key words:** Indigenous, Aboriginal and Torres Strait Islander, infant, prospective cohort study, clinical assessment tools, neurodevelopmental outcomes, neonatal screening, cerebral palsy, autism spectrum disorder, fetal alcohol spectrum disorder

### Strengths and limitations of this study:

- This prospective population-based cohort study investigates the use of standardised screening tools to predict a later diagnosis of adverse neurodevelopmental outcomes in an Australian Aboriginal and Torres Strait Islander birth cohort.
- Capacity building of local services and use of technology ensures infants and families can readily access gold standard screening programs close to home.
- Community and stakeholder engagement, knowledge sharing and co-design promotes access to culturally sensitive programs.

- The remote locality of many Indigenous communities in Australia may present challenges, limiting access to health services and impacting loss to follow-up of infants at study outcome timelines.

## INTRODUCTION

In Australia, Aboriginal and Torres Strait Islander peoples, are among the most disadvantaged across all domains. In acknowledgement of the unique and distinct countries, cultures and languages of Australian First Nations people, the term 'Indigenous' is respectfully used herein to encompass but not homogenise the diverse identities of Aboriginal and Torres Strait Islander peoples.

Ongoing intergenerational trauma, systematic displacement from traditional lands, loss of culture and racism experienced by Australian Indigenous people continues to manifest in socio-economic disadvantage, marginalisation, reduced education and employment opportunities, leading to poorer health outcomes[1,2]. Indigenous Australians are 1.8 times more likely to experience disability, twice as likely to have a severe disability and are less likely to access support[3] compared to non-indigenous Australians[4,5]. Inequities in access to culturally safe health and disability support services[6], long waiting lists and the rurality of some Indigenous communities, further compounds this disadvantage[7,8]. These factors have contributed to a significant gap in health outcomes between Indigenous and non-Indigenous Australians[3,9].

Indigenous children, living in urban, rural and remote Australia, have an increased risk of adverse Neurodevelopmental Outcomes (NDO). This can include being at risk for a range of specific childhood neurodevelopmental disorders (NDD): Cerebral Palsy (CP), Fetal Alcohol Spectrum Disorder (FASD), and Autism Spectrum Disorder (ASD)[8,10,11]. These conditions are characterised by impaired development of the early central nervous system, resulting in cognitive and/or physical disability[12,13]. Indigenous children are 30% more likely to have a physical disability, and are at higher risk of developmental and intellectual difficulties, compared to non-Indigenous children[11,14,15]. The prevalence of NDDs in some remote communities are reported to be as high as 30% of the paediatric population[10].

### **Indigenous infant early life risk factors**

Many Australian Indigenous infants can experience a range of perinatal, maternal, post-neonatal (PNN) and socioeconomic risk factors that increase their risk of later adverse NDOs. While the neonatal death rate for Indigenous infants has declined, the rates of preterm birth (i.e., <37 weeks GA), low birth weight (LBW; i.e., <2500g) and small for gestational age (SGA) births has remained relatively stable[16]. In 2018, infants of Indigenous mothers were 65 percent more likely to be born pre-term, 87 percent more likely to be LBW and 52 percent more likely to be SGA, compared to babies of non-Indigenous mothers[16]. In addition, 28 percent of Indigenous infants were admitted to the neonatal intensive care unit (NICU) or special care nursery (SCN), requiring specialised medical treatment[16].

Improving Indigenous birth outcomes, including preterm birth and LBW, is a national priority for the Australian Closing the Gap Agenda[17]. Infants born pre-term and with LBW have an increased risk of adverse NDOs, which can influence school readiness and academic achievement[18-22]. Biological and environmental risk factors impact birth outcomes and are

1  
2  
3 associated with increased risk of developmental vulnerability[14,23-25]. These factors are  
4 compounded by remote locality, access to appropriate and culturally sensitive antenatal care,  
5 and, socioeconomic disadvantage[23-25]. Maternal factors including age, education, health,  
6 smoking and substance use have been linked to poorer birth outcomes[14,24,25]. In Australia,  
7 Indigenous mothers are more likely to be younger, single, attain lower levels of education, live  
8 in lower socio-economic circumstances and have lower rates of attendance at antenatal  
9 care[16,25]. Emerging evidence demonstrates the protective impact of culturally led[26]  
10 birthing programs which have led to an improved uptake in antenatal care and smoking  
11 cessation, subsequently lowering the risk of neonatal and adverse developmental outcomes[26-  
12 29].

13  
14  
15  
16 The cultural, geographical and socio-economic barriers to healthcare access  
17 experienced by Indigenous Australians can lead to delayed identification of infants at risk of  
18 adverse NDOs with subsequent delays in receiving early intervention to optimise  
19 outcomes[11,30]. While there is consensus that early detection is important for all adverse  
20 NDOs, variability exists in the recommendations for the screening and diagnosis of CP, ASD  
21 and FASD.  
22

### 23 **Neurodevelopmental Disorders (NDD)**

24  
25  
26  
27 NDDs are characterised by distinct clinical manifestations and symptomology. A  
28 transdiagnostic approach supports the notion that many NDDs share similar early markers and  
29 comorbidities across multiple neurodevelopmental domains[31-33]. Targeted early screening  
30 programs should aim to identify an infant's risk status for a range of adverse NDOs which may  
31 predict a later specific diagnosis[32,34]. Differences in quality of movement, atypical motor  
32 development, and cognition are common early risk attributes and neurodevelopmental features  
33 of CP, ASD and FASD[10,35-39]. We hypothesise that valid and reliable predictive tools  
34 utilised for the detection of CP may also identify early neurodevelopmental vulnerabilities in  
35 infants at risk of a later diagnosis of ASD and FASD and/or other substantial developmental  
36 delays.  
37

### 38 ***Cerebral Palsy (CP)***

39  
40  
41  
42 Cerebral Palsy, the most common physical disability of childhood (1 in 700 live  
43 births)[40], is defined as a developmental disorder of movement and posture attributed to non-  
44 progressive disturbances in the developing brain that occur in early infancy, impacting  
45 function, participation and self-care[41]. Injury to the developing brain can occur pre-, peri-,  
46 or post-neonatally, due to a recognised event associated with brain damage[8].  
47

48  
49 Improvements in medical care and neuroprotective interventions for preterm birth,  
50 LBW and other pregnancy complications have been associated with a decline in the overall  
51 rate of CP[42]. Advances in early detection, diagnosis, prevention and intervention in high  
52 resource countries have additionally led to improvements in CP prognosis and decreased  
53 incidence[42,43]. In Australia, the trend in declining CP rates has demonstrated a decrease in  
54 incidence from 1 in 500 children to 1 in 700 children and a reduction in severity of motor  
55 function, with more children ambulant[40,43].  
56

57  
58 International Clinical Practice Guidelines support a confirmed or 'high risk' of CP  
59 diagnosis prior to 6 months CA[44]; however the age of diagnosis of CP in high income  
60

1  
2  
3 countries still occurs relatively late, usually between 12 to 24 months, delaying access to early  
4 intervention services[44]. The use of gold standard clinical assessments, such as Prechtl's  
5 Qualitative Assessment of General Movements (GMA), the Hammersmith Infant Neurological  
6 Examination (HINE) and Magnetic Resonance Imaging (MRI), are recommended for reliable  
7 and accurate prediction of 'high risk' of CP[44,45]. Individually these tools are highly  
8 sensitive, however a combined abnormal MRI and trajectory of abnormal GMA and HINE  
9 scores demonstrates the greatest diagnostic accuracy (97.8% sensitivity and 99.2% specificity)  
10 at 3 months CA[46]. The GMA evaluates the quality of an infant's early spontaneous  
11 movement patterns, which reflects central nervous system integrity and function[47,48]. An  
12 abnormal/absent GMA at 3 months CA is highly predictive of CP in 'high risk' infants[45],  
13 and may be a marker for other adverse NDOs[35,47,49-51]. Due to the time-sensitive nature  
14 of the GMA (at 11-17 weeks CA), the HINE is recommended to assess an infant's neurological  
15 development between 3-24 months CA[44]. The HINE also provides insight into CP  
16 topography (unilateral vs bilateral)[52,53] and severity (ambulant vs non-ambulant, GMFCS  
17 I-III vs IV-V)[54-58]. While the GMA and HINE are relatively easy to administer, trained  
18 clinicians are required to evaluate and interpret scores.

19  
20 In Australia, the rate of CP is estimated to be 50 percent higher for Indigenous  
21 children[8], with the rate of pre- or perinatally acquired CP almost three times that of non-  
22 Indigenous infants[59]. Indigenous infants with CP are more likely to be born extremely pre-  
23 term (<28 weeks) and LBW than non-Indigenous infants with CP, increasing their risk of  
24 functional severity[8,60]. Indigenous infants are five times more likely to acquire CP post-  
25 neonatally, which is associated with an increased severity of CP and linked to socioeconomic  
26 conditions[8,23,40]. In addition to higher rates of CP diagnosis, Indigenous children with CP  
27 have poorer cognitive and gross motor outcomes and a higher proportion of comorbidities,  
28 being twice as likely to have visual impairments and 50 percent have a co-diagnosis of  
29 epilepsy[8,59]. Accurate Australian data pertaining to the prevalence of CP, age of diagnosis,  
30 rates of referral and access to early intervention in Indigenous infants remains unknown.

### 31 ***Autism Spectrum Disorder (ASD)***

32  
33 Autism spectrum disorder (ASD) describes a group of heterogeneous NDDs  
34 characterised by core difficulties with social interaction and the presence of restrictive and  
35 repetitive patterns of interest or behaviours[61]. Many individuals with ASD demonstrate  
36 associated impairments in cognition, challenging behaviours, communication and motor  
37 function[38,62]. With a 42 percent increase in prevalence from 2015 to 2018 in Australia[63]  
38 the diagnosis of ASD continues to be commonly made after two years and frequently not until  
39 school age (i.e. average six years:[64]), limiting timely early intervention[65].

40  
41 Early motor abnormalities[38,39,66-68], reduced verbal skills, differences in social  
42 interactions[69,70] and ASD-related infant behaviours may be detected in children with ASD  
43 from 6 months CA; however, there are few ASD screening and diagnostic tools for infants <12  
44 months of age[70,71]. The Autism Observational Schedule in Infants (AOSI) evaluates the  
45 presence of ASD-related behaviours, in infants aged 6-18 months[71-74]. Elevated AOSI  
46 scores at 12 and 18 months CA are associated with ASD diagnosis at 2 and 3 years of age, and  
47 are predictive of social-communication difficulties in high risk infants at 2 years[72-75].  
48 Atypical responses to specific test items, including eye contact, social interest and orienting to  
49  
50  
51  
52  
53  
54  
55  
56  
57  
58  
59  
60

1  
2  
3 name are discriminative between high risk infants with a subsequent diagnosis, high risk infants  
4 without subsequent diagnosis and low risk infants[74,76]. Differences in infant motor  
5 development[67,68,77] and the quality of early infant movements may provide additional  
6 insights into ASD-related outcomes[35,47,51,78]. Studies investigating use of GMA for  
7 prediction of ASD in high risk infants, identified that >60 percent of children with a later  
8 confirmed diagnosis had abnormal or absent fidgety movements at 12-16 weeks of  
9 age[35,51,78]. Universal screening tools such as the Ages and Stages Questionnaire  
10 (ASQ:[79]) and the Rapid Neurodevelopmental Assessment (RNDA:[80]) identify infants with  
11 atypical cognitive, social and communication development, but require further investigation  
12 regarding the predictive ability of ASD-related behaviours.  
13

14  
15  
16  
17  
18  
19  
20  
21  
22  
23  
24  
25  
26  
27  
28  
29  
30  
31  
32  
33  
34  
35  
36  
37  
38  
39  
40  
41  
42  
43  
44  
45  
46  
47  
48  
49  
50  
51  
52  
53  
54  
55  
56  
57  
58  
59  
60  
There is a paucity of data relating to the prevalence of ASD in Australian Indigenous  
populations[81]. While some studies have investigated the incidence of ASD and intellectual  
disability among specific Indigenous communities, accurate prevalence remains relatively  
unknown, with reported inconsistencies impacted by differences in cultural conceptualisation  
of disability, misdiagnosis, and decreased awareness of ASD among Indigenous  
communities[3,15,64,81-84]. There is growing concern that Indigenous children are  
misdiagnosed or missing out on an ASD diagnosis[6,83], supporting the need for culturally  
sensitive early diagnostic tools and services.

### ***Fetal Alcohol Spectrum Disorder (FASD)***

Alcohol exposure in utero can result in adverse outcomes across multiple  
neurodevelopmental domains including: cognition, motor skills, brain structure, language,  
academic achievement, attention, and adaptive behaviour[85-87]. Fetal Alcohol Spectrum  
disorder (FASD) is the diagnostic term used for individuals who are exposed to alcohol  
prenatally and demonstrate severe impairment in 3 or more neurodevelopmental  
domains[86,88]. Diagnosis according to the Australian Guide is categorised as either; FASD  
with 3 sentinel facial features or FASD with < 3 sentinel facial features, indicating the presence  
or absence of facial dysmorphology specific to prenatal alcohol exposure (PAE) in the first  
trimester[86,87]. The co-existence of multiple comorbidities can complicate FASD diagnosis  
and further impact the long term sequelae[89]. FASD can be associated with an increased risk  
of physical health conditions[90], poor mental health, substance misuse, and involvement in  
the criminal justice system[91]. These lifelong consequences are extremely costly to the  
individual, family, health, education, disability and justice systems[92,93].

The Australian Guide to the assessment and diagnosis of FASD[88] recommends early  
intervention, however early diagnosis and provision of appropriate treatment strategies are  
under-developed[94]. In the absence of facial dysmorphology, there are few accurate early  
biomarkers for infants at risk of FASD[85,88,89,95]. Diagnostic assessments are complex, time  
consuming, and require a multidisciplinary team of specialised clinicians[87,96]. Furthermore,  
most of the recommended standardised neurodevelopmental assessments are for children >2  
years[88]. The use of standardised screening tools <6 months CA, such as GMA and HINE  
may enable the accurate detection of neurodevelopmental delay, which could lead to earlier  
diagnosis of FASD.

The reported prevalence of FASD and patterns of PAE in Australia are variable, due to  
complexities with missed or misdiagnosis, practitioners not enquiring about prenatal alcohol

use, and availability of diagnostic services[94,96,97]. In Australia, rates of FASD in some Indigenous populations are among the highest globally, impacted by the interplay of biological and psychosocial risk factors[10,97,98]. In one remote community 19 percent of school-aged children had a FASD diagnosis, 25 times higher than the global rate[98,99]. Furthermore, the prevalence of FASD (47 percent) among Aboriginal young people (13-17 years) in custody in WA is almost 6 times higher than that of non-Indigenous adolescents in custody[97]. The subsequent effect of PAE on developmental trajectory underpins the need for culturally sensitive, early screening tools to enable detection of infants who are high risk of FASD.

While there is emerging data on the prevalence and profile of adverse NDOs and NDDs in the Indigenous population[8,10,14,15,27,100] the focus has been on diagnosis of specific NDDs in early childhood. The aim of this cohort study is to investigate the use of early standardised screening tools (such as GMA, HINE) to determine risk status of infants aged  $\leq 12$  months CA, for a later diagnosis of CP, ASD, FASD and/or other substantial developmental delay in an 'at risk' Australian Indigenous birth cohort.

## OVERVIEW OF AIMS

### Broad Aim

The primary aim of the current study is to investigate the impact of early screening for Indigenous infants at risk of adverse NDOs due to prenatal, birth and early life factors, in terms of:

- i. Diagnostic accuracy, clinical utility and cultural appropriateness of early infant neurodevelopmental assessments to accurately predict a later 'at risk' diagnosis at 12 months CA.
- ii. Impact of perinatal variables, maternal factors and caregiver mental health on the developmental outcomes of Indigenous infants at risk of adverse NDOs in Queensland.

A comprehensive list of study aims and hypotheses are outlined in Table 1.

Table 1: LEAP-CP: Early detection study aims and hypotheses

|              |                                                                                                                                                                                                                                                                                                                                                                                                                                                                                         |
|--------------|-----------------------------------------------------------------------------------------------------------------------------------------------------------------------------------------------------------------------------------------------------------------------------------------------------------------------------------------------------------------------------------------------------------------------------------------------------------------------------------------|
| <b>AIM 1</b> | To determine the predictive accuracy, of the General Movements Assessment (GMA), the General Movements Motor Optimality Score (MOS), the Hammersmith Infant Neurological Examination (HINE), the Rapid Neurodevelopmental Assessment (RNDA), and the Ages and Stages – aboriginal adaptation (ASQ-TRAK) to predict a later outcome at 12 months CA of 'at high risk' of (i) CP or (ii) Adverse Neurodevelopmental Outcome (non-CP) or (iii) Typically developing in Indigenous infants. |
| <b>H1a</b>   | Sensitivity to detect CP at 12 months CA in Indigenous infants will be >98% for abnormal GMA (Absent Fidgety, Abnormal Fidgety) at 3 months CA and >90% for suboptimal HINE score (<60 and/or $\geq 5$ asymmetries) at 6 months CA.                                                                                                                                                                                                                                                     |
| <b>H1b</b>   | Specificity to detect CP at 12 months CA in Indigenous infants will be >90% for abnormal GMA (Absent Fidgety, Abnormal Fidgety) at 3 months CA and >85% for suboptimal HINE score (<60 and/or $\geq 5$ asymmetries) at 6 months CA.                                                                                                                                                                                                                                                     |
| <b>H1c</b>   | Indigenous infants with a confirmed or 'at risk' diagnosis of CP at 12 months will have a motor optimality score (MOS) between 8 and 14 (GMFCS I-III) or <8 (GMFCS IV and V) at 3-5 months CA, infants with a diagnosis of 'at risk' of adverse NDOs (non-CP) at 12 months CA will have a MOS <21 at 3-5 months CA.                                                                                                                                                                     |

|                                                                                                                                                                                                                                                                                                                                                                             |                                                                                                                                                                                                                                                                                                                                                                                                                                                                                                                                                |
|-----------------------------------------------------------------------------------------------------------------------------------------------------------------------------------------------------------------------------------------------------------------------------------------------------------------------------------------------------------------------------|------------------------------------------------------------------------------------------------------------------------------------------------------------------------------------------------------------------------------------------------------------------------------------------------------------------------------------------------------------------------------------------------------------------------------------------------------------------------------------------------------------------------------------------------|
| <b>H1d</b>                                                                                                                                                                                                                                                                                                                                                                  | The sensitivity and specificity of the GMA and MOS to detect an adverse NDO (non-CP) at 12 months CA will be less than that of CP.                                                                                                                                                                                                                                                                                                                                                                                                             |
| <b>H1e</b>                                                                                                                                                                                                                                                                                                                                                                  | Sensitivity and specificity to detect adverse NDOs (non-CP) at 12 months CA will be $\geq 81\%$ and $\geq 71\%$ respectively for suboptimal HINE score ( $<65$ ) at 6 months or ( $<70$ ) at 9 months CA.                                                                                                                                                                                                                                                                                                                                      |
| <b>H1f</b>                                                                                                                                                                                                                                                                                                                                                                  | Indigenous infants who score 'at risk' on $\geq 1$ domain the ASQ-TRAK at 6 months CA (domain specific cut offs gross motor $<23$ , fine motor $<26$ , communication $<30$ , problem-solving $<28$ , personal-social $<26$ ) will have a diagnosis of 'at risk' of adverse NDOs (non-CP) and/or CP at 12 months CA.                                                                                                                                                                                                                            |
| <b>H1g</b>                                                                                                                                                                                                                                                                                                                                                                  | Indigenous infants who score moderate to severe on any domain of the RNDA at 6 months CA will have good to excellent specificity ( $>0.8$ ) compared to poor to fair sensitivity (0.6-0.8) to detect 'at risk' of CP and/or adverse NDOs (non-CP) at 12 months CA.                                                                                                                                                                                                                                                                             |
| <b>AIM 2</b>                                                                                                                                                                                                                                                                                                                                                                |                                                                                                                                                                                                                                                                                                                                                                                                                                                                                                                                                |
| To determine the neurological (HINE), motor (PDMS-2), cognitive (BSID-III), developmental (PEDI-CAT/ASQ-TRAK) and behavioural (ITSEA) profiles of Indigenous infants with a diagnosis of 'at risk' of specific NDDs (i) CP, (ii) ASD, (iii) FASD, and/or (iv) adverse NDO (non-specific) or (v) typically developing/borderline at 12 months CA compared to normative data. |                                                                                                                                                                                                                                                                                                                                                                                                                                                                                                                                                |
| <b>H2a</b>                                                                                                                                                                                                                                                                                                                                                                  | Indigenous infants at high risk of CP at 12 months CA will score HINE $<70$ (GMFCS I-III), or $\leq 40$ (GMFCS IV-V); BSID-III $>2SD$ below the mean (50% cognitive scale, 25% communication scale), PDMS-2 $>1$ SD below the mean (GMFCS I- III) or $>2$ SD below the mean (GMFCS IV-V) and PEDI-CAT $>1SD$ below the mean (GMFCS I-III) or $>2$ SD below the mean (GMFCS IV-V) (mobility scale).                                                                                                                                             |
| <b>H2b</b>                                                                                                                                                                                                                                                                                                                                                                  | Indigenous infants with ASD symptomology at 12 months CA will have a greater number of risk markers on the AOSI and/or will score HINE $<70$ , on average score $>1$ SD below the mean on the BSID-III (communication scale, cognitive scale), and PDMS-2, PEDI-CAT $>2$ SD below the mean (personal/social scale), ITSEA $\geq 1.5$ SD below the mean (competence domain) and/or $\geq 1.5$ SD above the mean (externalising, internalising, dysregulation domains).                                                                          |
| <b>H2c</b>                                                                                                                                                                                                                                                                                                                                                                  | Indigenous infants with FASD symptomology at 12 months CA will have microcephaly, $\leq 3$ sentinel facial features and significant impairment ( $\geq 2$ SD below the mean or equivalent) on $\geq 3$ developmental domains including motor (PDMS-2 total motor quotient, PEDI-CAT mobility), neurological ( $<70$ on the HINE), cognitive (BSID-III cognitive subscale, PEDI-CAT daily activities), communication (BSID-III language composite score), Adaptive behaviour/social skills (PEDI-CAT personal/social scales, ITSEA subdomains). |
| <b>H2d</b>                                                                                                                                                                                                                                                                                                                                                                  | Indigenous infants at risk of adverse NDOs (non-specific) at 12 months will have significant impairment ( $>2$ SD below the mean) on 1 domain and/or mild to moderate impairment ( $>1SD$ below mean) in $\geq 2$ domains including motor (PDMS-2 total motor quotient, PEDI-CAT mobility), neurological ( $<70$ on the HINE), cognitive (BSID-III cognitive subscale, PEDI-CAT daily activities), communication (BSID-III language composite score), Adaptive behaviour/social skills (PEDI-CAT personal/social scales, ITSEA).               |
| <b>H2e</b>                                                                                                                                                                                                                                                                                                                                                                  | Indigenous infants typically developing ( $\leq 1SD$ below the mean or equivalent on all developmental domains) or borderline (mild delay; between 1 and 2SD below the mean on 1 domain) at 12 months CA will score $>70$ on the HINE (neurological), and $\leq 1$ SD below the mean on the PDMS-2, BSID-III, PEDI-CAT and ITSEA (motor, cognition, communication, self-care and personal/social scales, behaviour).                                                                                                                           |
| <b>AIM 3</b>                                                                                                                                                                                                                                                                                                                                                                |                                                                                                                                                                                                                                                                                                                                                                                                                                                                                                                                                |
| To determine the clinimetric properties of outcome and/or predictive measures used to assess a cohort of 'at risk' Indigenous infants (GMA, HINE, RNDA, ASQ-TRAK, BSID-III, PDMS-2, PEDI-CAT, ITSEA) in terms of (i) construct validity, (ii) reliability, (iii) cultural acceptability and (iv) clinical utility/feasibility.                                              |                                                                                                                                                                                                                                                                                                                                                                                                                                                                                                                                                |



|                                                                                                                                                                                                   |                                                                                                                                                                                                                                                                                                                                                                                                                                                                                                                 |
|---------------------------------------------------------------------------------------------------------------------------------------------------------------------------------------------------|-----------------------------------------------------------------------------------------------------------------------------------------------------------------------------------------------------------------------------------------------------------------------------------------------------------------------------------------------------------------------------------------------------------------------------------------------------------------------------------------------------------------|
| <b>H3a</b>                                                                                                                                                                                        | Indigenous infants who are assessed to have $\geq 2$ neurodevelopmental impairments (NDI) and/or score moderate to severe impairment on any domain of the RNDA at 6 months and 12 months CA will have suboptimal HINE scores at 6 (<65) and 12 (<70) months CA.                                                                                                                                                                                                                                                 |
| <b>H3b</b>                                                                                                                                                                                        | Indigenous infants who score 'at risk' on the communication (<16) and/or problem-solving (<28) domains of the ASQ-TRAK at 12 months CA will score $\geq 2$ SD below the mean on the language and/or cognitive domains of the BSID-III at 12 months CA.                                                                                                                                                                                                                                                          |
| <b>H3c</b>                                                                                                                                                                                        | Indigenous infants who score 'at risk' on the gross motor (<22) and/or fine motor (<35) domains of the ASQ-TRAK at 12 months CA will score $\geq 2$ SD below the mean on the Gross Motor and/or Fine Motor Quotients of the PDMS-2 at 12 months CA.                                                                                                                                                                                                                                                             |
| <b>H3d</b>                                                                                                                                                                                        | Indigenous infants who score 'at risk' on the personal-social (<22) domain of the ASQ-TRAK at 12 months CA will score $\geq 2$ SD below the mean on the corresponding domain of the PEDI-CAT and ITSEA at 12 months CA.                                                                                                                                                                                                                                                                                         |
| <b>H3e</b>                                                                                                                                                                                        | There will be strong interrater reliability and agreement ( $k > 0.8$ ) between clinicians and community health workers for the HINE, RNDA and ASQ-TRAK.                                                                                                                                                                                                                                                                                                                                                        |
| <b>H3f</b>                                                                                                                                                                                        | The clinical utility and cultural acceptability of screening tools used to predict later neurodevelopmental outcomes of Indigenous infants at $\leq 9$ months (GMA, HINE, RNDA and ASQ-TRAK) will be higher than that of tools used to measure developmental outcomes at 12 months CA (PDMS-2, BSID-III, PEDI-CAT, ITSEA).                                                                                                                                                                                      |
| <b>AIM 4</b>                                                                                                                                                                                      |                                                                                                                                                                                                                                                                                                                                                                                                                                                                                                                 |
| To determine the relationship between (i) perinatal variables, (ii) maternal risk factors and outcomes of (i) motor, (ii) cognition and (iii) development for Indigenous infants at 12 months CA. |                                                                                                                                                                                                                                                                                                                                                                                                                                                                                                                 |
| <b>H4a</b>                                                                                                                                                                                        | Adverse perinatal variables including, gestational age (<37weeks) , low birthweight (<2500g), events that signify complications during labour and delivery, adverse neonatal medical complications, and post-neonatal events including, infection, non-accidental injury, cerebro-vascular accident, will be significantly associated with lower scores on neurological, motor, cognitive, developmental and behavioural assessments at 12 months CA (HINE, PDMS-2, BSID-III, ASQ-TRAK, PEDI-CAT, RNDA, ITSEA). |
| <b>H4b</b>                                                                                                                                                                                        | Maternal risk factors (significant maternal medical conditions, antenatal medical complications and treatment, antenatal substance use and social risk factors as determined by the Social Risk Index), will be associated with lower scores on neurological, motor, cognitive, developmental and behavioural assessments at 12 months CA (HINE, PDMS-2, BSID-III, ASQ-TRAK, PEDI-CAT, RNDA, ITSEA).                                                                                                            |
| <b>H4c</b>                                                                                                                                                                                        | Elevated caregiver stress, anxiety and depression on the DASS-21 will be associated with lower scores on neurological, motor, cognitive, developmental and behavioural measures in Indigenous infants at 12 months CA (HINE, PDMS-2, BSID-III, ASQ-TRAK PEDI-CAT, RNDA, ITSEA).                                                                                                                                                                                                                                 |

## METHODS

### Study Design

This multi-site prospective cohort study of 120 Indigenous infants will be conducted in Queensland, Australia, commencing in 2021 and will run for two years, with planned completion for 2023. The methodological design follows the Strengthening the Reporting of Observational Studies in Epidemiology (STROBE) guidelines[101].

### Participants

A cohort of 120 Indigenous infants with identified risk factors for adverse NDOs will be recruited. Recruitment will occur over an 18-month period (birth years 2020-2022) from the

1  
2  
3 Neonatal Intensive Care Unit (NICU), Special Care Nurseries (SCN), Paediatric wards and  
4 outpatient clinics across Queensland.  
5

### 6 **Inclusion Criteria**

7  
8 Infants eligible for screening will be those aged 0-9 months CA with one or both biological  
9 parents identifying as Aboriginal and/or Torres Strait Islander, who meet the following criteria:

- 10 (i) pregnancy complications, LBW (<2500g), born preterm (<37 weeks gestation), or  
11 at term with Hypoxic Ischemic Encephalopathy (HIE), 5 min Apgar <6, history of  
12 neurological risk factors (e.g., admission to NICU/SCN, congenital abnormalities,  
13 SGA, seizures), post-neonatal complications (e.g., head injury, stroke, infection,  
14 non-accidental injury), maternal risk factors that may impact neonatal outcomes  
15 (e.g. medical conditions, , antenatal substance use) or family history of adverse  
16 NDOs and/or sibling with a diagnosed NDD.  
17  
18 (ii) reside in Queensland.  
19  
20  
21

### 22 **Exclusion Criteria**

23 Infants with major congenital or chromosomal abnormalities identified as part of routine  
24 medical care.  
25  
26

### 27 **Recruitment procedures**

28  
29 Infants will be recruited through Queensland Hospital and Health services (HHS) and  
30 Aboriginal Community Controlled Health Organisations with ethics and governance approvals  
31 in place (see acknowledgments). The study will be introduced to parents or caregivers of infants  
32 who meet eligibility criteria by an Indigenous Liaison Officer (ILO) or member of staff from  
33 the recruiting sites. If families are interested in participating and consent to being contacted, a  
34 member of the research team will contact the family and provide information regarding the  
35 study, including a culturally adapted parent information statement. The research team member,  
36 who is not associated with the infant's care, will explain the study in more detail and answer  
37 all parent questions prior to seeking informed consent for study participation. Families will be  
38 given the option to verbally discuss the parent information sheet with an ILO or Indigenous  
39 Community Health Worker (CHW) prior to providing written informed consent to participate.  
40 Once signed consent is obtained, the infant will be enrolled in the study and will commence  
41 the relevant screening assessments.  
42  
43  
44  
45  
46

### 47 **Sample Size**

48 This study aims to predict a later diagnosis of (i) typical development or 'at risk' of specific  
49 NDD, (ii) CP, (iii) ASD, (iv) FASD and/or (v) adverse NDO (non-specific) in a population of  
50 Indigenous infants with known exposure to early life risk factors. The projected sample size of  
51 120 Indigenous infants is based on the expected number of new diagnoses of CP, ASD, FASD  
52 or adverse NDOs over an 18-month period at the study sites. The Cairns and Townsville  
53 hospitals have a potential combined total of 1400 infants admitted to their NICU and SCN's  
54 per year. Approximately 38 percent (n=540) of these infants have one or both biological parents  
55 who identify as Indigenous. The proportion of participating children with an adverse NDO we  
56 are likely to observe in the LEAP-CP cohort has been estimated by combining data from  
57  
58  
59  
60

1  
2  
3 Australian data registers with data from a retrospective audit of a cohort of high risk infants  
4 admitted to the Townsville Hospital NICU or SCN during 2019-2020.

5  
6 The Western Australia Cerebral Palsy register is the register that has reported rates of CP in  
7 Indigenous children for the longest duration and has a current estimate of 4.01 CP cases per  
8 1000 births. Incidence of ASD in Indigenous Australian children is hypothesised to be  
9 approximately equal non-Indigenous rates, at between 7 and 15 ASD cases per 1000  
10 births[6,81]. Incidence of FASD in Indigenous Australians is estimated at 17 FASD cases per  
11 1000[102], but could be as much as 10-times higher in some remote communities[98]. The  
12 overall number of Indigenous children who have either developmental delay or an adverse  
13 NDO may range from 10% in low risk cohorts[14] to 30% in high risk remote  
14 communities[10].

15  
16 A retrospective audit of high-risk Indigenous children admitted to the Townsville  
17 Hospital neonatal unit or SCN identified 16 children with known outcomes at 12 - 24 months  
18 CA. Of these children, 25 percent were at high risk of CP, 25 percent were at risk of a non-CP  
19 NDO, 31 percent had a non-neuromotor delay while 19 percent had no neurodevelopmental  
20 concerns. Overall >80 percent of these children were classed as having at least mild delay,  
21 although it should be noted that these children were at higher risk for an NDO than those who  
22 will participate in the LEAP-CP cohort. For the 120 children recruited to the LEAP-CP cohort  
23 we estimate approximately one-third (33 percent) will be identified as being at risk of an NDO.  
24 This will allow us to estimate the diagnostic accuracy of tools to within  $\pm 12\%$  (sensitivity) and  
25  $\pm 9\%$  (specificity), assuming accuracy of 80 percent. When identifying characteristics  
26 associated with an NDO, assuming we have a binary predictor variable with equal numbers in  
27 each category and a baseline risk of 0.33, we will have 80 percent power ( $\alpha=0.05$ ) to  
28 identify relative risks of 1.75 or greater.  
29  
30  
31  
32  
33  
34  
35  
36

### 37 **Patient and Public Involvement**

38  
39 Members of Indigenous communities at each participating site across Queensland have and  
40 will continue to be actively engaged at all stages of study development and the research  
41 program. Key community stakeholders including community elders, Aboriginal and Torres  
42 Strait Islander health workers, Indigenous researchers and people with lived experience as  
43 parents of infants/children with cerebral palsy, have been involved in all steps of study design.  
44 Consultation and input particularly guided the cultural adaptation and development of  
45 culturally safe and sensitive delivery, presentation and feedback of information to families and  
46 caregivers including early screening, recruitment and consent processes and key measures to  
47 be utilised throughout the program. Consultation and engagement with key stakeholders will  
48 continue to be sought throughout program delivery, final analysis and data interpretation.  
49 Strategies targeting key components of cultural safety and sensitivity, consultation and co-  
50 design, capacity building and sustainability, are fundamental to the cultural framework that  
51 underpins this study and will be led by Indigenous co-investigators. Consumer engagement  
52 will be embedded into the study at key screening and outcome timepoints to evaluate  
53 parent/caregiver and CHW experience and satisfaction with the screening process and  
54 appropriateness and feasibility of assessments.  
55  
56  
57  
58  
59  
60

1  
2  
3  
4  
5 The final results of the study will be presented in collaborative workshops involving key  
6 stakeholders, Aboriginal and Torres Strait Islander community members and personnel at each  
7 participating site at the conclusion of the study. Information on the study results will also be  
8 reported to all participants as summary data presented to each participating family.  
9

## 10 **Data Collection Methods**

11  
12 Data collection will commence following consent and enrolment. Extensive perinatal data will  
13 be collected from the infant's medical records, including gestational age, birthweight, sex, birth  
14 history, neonatal course and maternal risk factors (See **Supplementary S1: LEAP-CP Medical**  
15 **Checklist: Part 1 – Perinatal data and birth history**). Primary caregivers will complete a baseline  
16 parent questionnaire that collects detailed socio-demographic information including, maternal  
17 and paternal education and employment, social support, family structure and prenatal  
18 exposures (See **Supplementary S1: LEAP-CP Medical Checklist: Part 2- Socio-demographic**  
19 **Information**). Caregivers will be given the option to complete this form either independently  
20 or during a supported interview with an ILO or Indigenous CHW.

21  
22 Participants will be screened at two time points, (i) birth to 5 months CA, and (ii) 4 to 9 months  
23 CA. Infants can enter the study at any time between birth and 9 months CA, and will commence  
24 the relevant screening protocol based on their age at study entry. Outcome measures will be  
25 completed at 12 months CA (See Figure 1: LEAP-CP prospective cohort study timeline).

### 26 ***Birth to 5 months CA (Screening stage 1)***

27  
28 Infants recruited prior to 9 weeks CA, will be assessed as an inpatient or outpatient, using the  
29 General Movements Assessment, (GMA, writhing period)[48]. The assessment will be  
30 recorded by a member of staff who is trained in the procedural guidelines for GMA and  
31 uploaded to a secure server. Between 12- and 17-weeks CA infants will be assessed twice using  
32 the GMA (fidgety period) via video taken at a clinic appointment or by an application on the  
33 caregiver's phone and later uploaded to a secure server. The General Movements smartphone  
34 application (Baby Moves;[103]) will be set up on the caregiver's phone by a member of  
35 hospital staff or the research team on recruitment to the study. Culturally adapted  
36 written/pictorial instructions will be provided to guide caregivers how to video their infant's  
37 movements, with support offered by an ILO/CHW. A reminder will be sent via the Baby Moves  
38 app to caregivers to ensure videos are recorded at two time-points (ideally at 12- and 14-weeks  
39 CA). All GMA videos will be viewed and scored by a minimum of two assessors who are  
40 advanced trained by the General Movement Trust and are masked to the participant's identity  
41 and medical history. The General Movements Motor Optimality Score (MOS) will be assessed  
42 and scored simultaneously using the infant's fidgety GMA videos by the same independent  
43 assessors[104].  
44  
45  
46  
47  
48  
49  
50  
51  
52

### 53 ***Assessments at 4 to 9 months CA (Screening stage 2)***

54  
55 The second stage of screening will occur from 4 to 9 months CA. Infants will attend an  
56 appointment with a local health care worker where they will be assessed using the HINE, Rapid  
57 Neurodevelopmental Assessment (RNDA), Ages and Stages – Aboriginal adaptation (ASQ-  
58 TRAK) and clinical assessment of physical features of FASD (photograph with or without  
59 direct measurement). The mother or primary caregiver will complete the Depression Anxiety  
60

1  
2  
3 Stress Scale (DASS-21). Developmental assessments will be administered and scored live by  
4 a trained allied health professional, paediatrician, CHW or child health nurse and will be video  
5 recorded to allow for independent scoring by a masked assessor. Results from all early  
6 screening assessments will be provided to the infant's treating team with parental/caregiver  
7 consent. Infants who are rated absent or abnormal fidgety movements on the GMA at 3 months  
8 CA and/ or receive a suboptimal HINE score at 4-9 months CA are considered to be at 'high  
9 risk' of CP and /or adverse NDO and will be referred to the LEAP-CP intervention trial and  
10 linked with local community health services.  
11  
12

### 13 ***Outcomes at 12 months CA***

14  
15  
16 At 12 months CA ( $\pm$  1 month) all participants will attend an appointment at their local health  
17 service. Infants will be assessed by a trained allied health clinician on the HINE, RNDA, ASQ-  
18 TRAK, Peabody Developmental Motor Scales – 2<sup>nd</sup> Edition (PDMS-2), and the cognitive and  
19 language scales of the Bayley Scales of Infant Development – 3<sup>rd</sup> edition (BSID-III). Infants  
20 will complete diagnostic specific outcome measures (i) Autism Observation Scale for Infants  
21 (AOSI; ASD) and (ii) clinical assessment of physical features of FASD (photograph with or  
22 without direct measurement) to determine the presence of symptomology and risk of a later  
23 diagnosis of ASD and/or FASD. Assessments will be recorded to allow independent scoring  
24 by an assessor masked to the infant's risk of adverse NDOs, medical history and previous  
25 assessment findings. A paediatrician, masked to the infant's developmental history, will  
26 complete the medical assessment for differential diagnosis from video and photographic  
27 (FASD symptomology) assessment (See **Supplementary S2: LEAP CP: 12-month Medical**  
28 **Assessment – Differential Diagnosis**). Caregivers will complete the DASS-21, Infant Toddler  
29 Social-Emotional Assessment (ITSEA), Pediatric Evaluation of Disability Inventory -  
30 Computer Adaptive Test (PEDI-CAT) and health resource and information questionnaire,  
31 either independently or as an interview supported by an ILO or CHW (See **Supplementary**  
32 **S3: LEAP – CP Medical and Allied Health Resource Form**). Child outcomes will be provided  
33 to parents/caregivers via written report and results will be forwarded to the infant's treating  
34 team with parental/caregiver consent.  
35  
36  
37  
38  
39  
40  
41

## 42 **MEASURES**

### 43 **Infant Predictor Variables**

#### 44 ***Prechtl's Qualitative Assessment of General Movements (GMA)***

45  
46 Prechtl's Qualitative Assessment of General Movements (GMA) is a predictive and  
47 discriminative tool used to longitudinally observe the quality of early spontaneous movement  
48 patterns in infants from birth to 20 weeks CA. The GMA demonstrates high diagnostic  
49 accuracy, 97 percent specific and 95-98 percent sensitive, at 3 months CA for detecting infants  
50 with a later diagnosis of CP[44-46]. General Movements (GMs) are assessed over specific time  
51 periods as either writhing (birth – 9 weeks CA) or fidgety (9-20 weeks CA). Writhing  
52 movements are rated as normal, characterised by complex, variable, fluent movements  
53 involving the whole body, or abnormal, classified as either poor repertoire, cramped  
54 synchronised or chaotic[47,48]. Fidgety movements (FMs) are present from 9 weeks until  
55 voluntary, more purposeful movements become predominant[47,48]. Typical (normal) FMs  
56  
57  
58  
59  
60

1  
2  
3 are defined as small amplitude, multidirectional movements, of the trunk, neck and limbs, of  
4 moderate speed, that are continuous in the awake infant, except during periods of crying,  
5 fussing and focussed attention[47]. Atypical FMs are classified as either absent or abnormal,  
6 referring to either the absence (absent) or exaggeration (abnormal) of typical fidgety  
7 movements[47]. While the absence of FMs at 3 months is the best predictor of CP[45],  
8 abnormal GMA at writhing age has been associated with later cognitive delays[105], and  
9 abnormal fidgety GMA (abnormal or absent) has been associated with early motor delay related  
10 to prenatal substance use[36], and is emerging as a potential marker of atypical movement  
11 patterns in infants later diagnosed with ASD[35,106]. Assessment of the GMA requires a 3-5-  
12 minute video of the infant lying in supine, during periods of active wakefulness, free from  
13 distractions. In this study writhing GMA will be completed only if infants are recruited between  
14 birth and 4 weeks post term age. Fidgety GMA will occur at two timepoints (ideally between  
15 12- and 17-weeks CA) to give optimal opportunity for FMs to emerge within the 'peak'  
16 window[107] and will be scored by at least two advanced trained assessors, masked to the  
17 infant's medical and clinical history, to decrease the potential impact of measurement bias.  
18  
19  
20  
21  
22

### 23 24 ***General Movements Motor Optimality Score (MOS)***

25  
26 The MOS is a more detailed analysis of an infant's fidgety GMA to determine their concurrent  
27 motor repertoire at 3-5 months CA by observing postural patterns and movement quality,  
28 across five subcategories[104]. The score of each subcategory; quality of fidgety movements,  
29 quality of movement patterns, age-adequate movement repertoire, postural patterns and  
30 movement character, combine to give a total MOS ranging from 5 to 28[104]. Scores  $\geq 25$  are  
31 optimal and indicative of typical outcomes, scores ranging from 20 to 24 are mildly reduced  
32 and MOS  $< 20$  requires intervention[57,104]. The presence of specific movement patterns and  
33 low scores on the MOS are predictive of a later CP diagnosis and may provide early markers  
34 for CP severity, subtype and topography[104,108,109]. Increasing evidence supports the MOS  
35 as a prognostic indicator for adverse NDOs (non-CP), and therefore, its function as a  
36 transdiagnostic screening tool. Suboptimal MOS scores have been associated with later  
37 outcomes of minor neurological dysfunction, language impairments, learning and behavioural  
38 difficulties in children without a CP diagnosis[110,111]. Additionally, a monotonous  
39 movement character was identified in almost 60% of infants who were prenatally exposed to  
40 alcohol and addictive substances[36], has been found in infants with later diagnoses of NDDs  
41 (non-CP) including ASD[51] and genetic disorders[104], and, has been linked to cognitive  
42 delays at school age in a cohort of high risk infants[112]. The MOS will be assessed and scored  
43 concurrently with fidgety GMA, by the same masked, advanced trained assessors.  
44  
45  
46  
47  
48  
49

### 50 51 ***Hammersmith Infant Neurological Evaluation (HINE)***

52  
53 The HINE is a quantifiable, neurological examination for infants aged 2-24 months CA[113].  
54 It is predictive of suboptimal neurodevelopmental outcomes with 90 percent accuracy in  
55 predicting CP in infants aged  $> 18$  weeks CA.[44,114]. The HINE is divided into 3 sections,  
56 section 1 consists of 26 items that assesses infant neurological function across five domains:  
57 cranial nerves, posture, tone, reflexes and movements. Sections 2 and 3 evaluate the infant's  
58 motor development and state of behaviour, these sections are not scored[113]. Each item from  
59  
60

1  
2  
3 section 1 is scored from zero to three, where a score of three is indicative of an optimal item  
4 response. Item scores are combined to determine a global optimality score, with a maximum  
5 possible score of 78. An infant's global score is compared to age specific optimality scores and  
6 cut-offs to determine risk of adverse NDOs[113]. Suboptimal HINE scores (<65, <70) at 6 and  
7 9-12 months respectively are associated with significant delays and/or CP at 2 years[37], with  
8 further age specific cut-points (<57, <60, <63 and <66) at 3, 6, 9 and 12 months respectively,  
9 predictive of a later diagnosis of CP[54]. Infants with hemiplegic CP or milder neurological  
10 disorders may score above age-specific cut offs[52,54]. Differences observed in item responses  
11 between the left and right sides are recorded as asymmetries and are combined to obtain a total  
12 asymmetry score. A total of  $\geq 5$  asymmetries are associated with increased risk of unilateral  
13 CP[52]. The HINE is accessible, quick to administer, approximately 5-10 minutes, and has  
14 good interobserver reliability, even when performed by less experienced staff[113].

### 15 ***Rapid Neurodevelopmental Assessment (RNDA)***

16  
17  
18  
19  
20  
21 The RNDA is a criterion-based instrument, originally designed to comprehensively assess and  
22 identify children 'at risk' of neurodevelopmental impairment (NDI) living in low to middle  
23 income countries with limited access to health screening services[80]. The screening tool is  
24 intended for use by lay health workers and has been successfully integrated into Aboriginal  
25 Health clinics at Gidgee Healing in Mt Isa, Queensland[115,116]. The instrument assesses the  
26 functional status of children aged 0-9 years to determine the presence and severity of NDIs  
27 across multiple domains[80,117,118]. Infants aged 1-24 months CA are assessed across eight  
28 domains: gross motor, fine motor, vision, hearing, speech, cognition, behaviour and seizures.  
29 Each item is scored on a 4-point scale, as normal = 0, mild= 0.5, moderate=1 or severe=2  
30 impairment. The sum of item scores are used to determine the presence and degree of  
31 impairment for each domain[119]. The RNDA has been validated in infants  $\leq 2$  years CA to  
32 determine the presence of NDI vs no NDI[80] and demonstrates moderate to high agreement  
33 with the Bayley Scales of Infant Development – second edition and BSID-III for identifying  
34 infants aged <12 months CA with and without NDIs[80,120]. The RNDA has good face  
35 validity, evident in its acceptability by caregivers, clinicians and infants, and has been  
36 culturally adapted for use in other countries[80,120]. The RNDA has high interrater reliability  
37 among medical professionals across the domains of gross motor ( $k=1.00$ ), behaviour ( $k=1.00$ ),  
38 fine motor ( $k=0.93$ ) and seizures ( $k=0.91$ ), with moderate agreement for cognition ( $k=0.80$ ),  
39 hearing ( $k=0.78$ ) and speech ( $k=0.63$ )[80]. A similar level of agreement was also demonstrated  
40 between local community workers and trained health professionals across cognition, speech,  
41 behaviour, gross and fine motor domains[120]. Administration time for the RNDA is between  
42 30-45 minutes and must be completed by a trained clinician or health worker[80].

### 43 ***Ages and Stages Questionnaire, Australian Aboriginal adaptation (ASQ- TRAK)***

44  
45  
46  
47  
48  
49  
50  
51  
52  
53  
54 The ASQ-TRAK (adapted from the Ages and Stages Questionnaire 3<sup>rd</sup> edition;[79]) is the only  
55 developmental screening tool that has been adapted and validated specifically for use in an  
56 Australian Indigenous context[121,122]. The ASQ-TRAK demonstrates acceptable accuracy,  
57 sensitivity (71 percent), specificity (92 percent), for detecting developmental concerns in  
58 Indigenous children, and, has demonstrated concurrent validity with the BSID-III, with  
59 moderate correlation between corresponding domain scores on both tools[121]. The ASQ-  
60

1  
2  
3 TRAK consists of interview-based questionnaires available for children aged 2, 6, 12, 18, 24,  
4 36 and 48 months, assessing outcomes across five areas; communication, gross motor, fine  
5 motor, problem solving, personal-social[123]. The screening tool contains the same items and  
6 scoring as the ASQ-3 but is based on a caregiver interview, with opportunity for the child to  
7 demonstrate skills. Culturally relevant adaptations to the ASQ-3 include, translation into local  
8 language and item modifications to ensure cultural relevance[123]. Individual items are  
9 assessed as “yes”, “sometimes” or “not yet” to ascertain a score of 10, 5 or 0 respectively.  
10 Individual, domain specific, item scores are combined to determine the total domain score  
11 (maximum = 60). Scores are compared to domain specific cut-offs to determine risk of  
12 developmental delay, with further assessment recommended for infants who score below the  
13 cut off, or ‘at risk’, for any domain[122]. The ASQ-TRAK has proven face validity and was  
14 determined to be culturally relevant and acceptable by Aboriginal health care workers and  
15 parents[123,124]. The screener takes 30-60 minutes to complete and can be administered by  
16 trained health care workers[121].  
17  
18  
19  
20  
21  
22

## 23 Outcome Measures

### 24 1. Infant

25  
26  
27 Outcomes will be assessed at 12 months CA ( $\pm 2$  weeks) by a trained allied health clinician  
28 and videoed for scoring by a researcher masked to perinatal data and earlier assessment data  
29 points.  
30

#### 31 *Peabody Developmental Motor Scales second edition (PDMS-2)*

32  
33 Infant primary motor outcomes at 12 months CA will be assessed using the PDMS-2, a  
34 standardised, norm-referenced measure used to evaluate the gross and fine motor development  
35 of children aged birth to 6 years[125]. The gross motor component is comprised of four  
36 subtests: reflexes, stationary, locomotion and object manipulation. Two subtests, grasping and  
37 visual-motor integration, form the fine motor component[125]. Individual items are allocated  
38 a score from zero to two based on performance, 0 (unable to perform), 1 (partial performance)  
39 or 2 (correct performance). Subtest raw scores are used to determine motor outcomes and  
40 ascertain the presence and severity of motor delay. The PDMS-2 has demonstrated predictive  
41 validity, sensitivity (92 percent), to identify abnormal development at 18 months in preterm  
42 infants assessed at 8 months[126]. The assessment has concurrent validity with both the BSID-  
43 III[127] and the Gross Motor Functional Measure[128]. The PDMS-2 is responsive to change  
44 in a population of infants[129] and toddlers with CP[130]. The assessment takes 45-60 minutes  
45 to complete, with formal training not required for the administration and scoring of the PDMS-  
46 2.  
47  
48  
49  
50

#### 51 *Bayley Scales of Infant Development – 3rd edition (BSID-III)*

52  
53 The BSID-III is the gold standard, norm-referenced assessment for measuring the development  
54 of infants and toddlers, aged 1–42 months, to determine infant cognitive and communication  
55 outcomes at 12 months CA. The BSID-III comprises five scales, cognitive, language, motor,  
56 social-emotional and adaptive behaviour. Items are administered in a standardised procedure  
57 and scored as either credit=1 or no credit=0. A composite score of  $>2$  SD below the mean on  
58 any scale is indicative of delay and supports the need for intervention[131]. In this study we  
59  
60



1  
2  
3 will use the BSID-III cognitive and language scales to assess infant outcomes at 12 months  
4 CA. The BSID-III (cognitive and language scales) have demonstrated predictive validity for  
5 outcomes on the Weschler Preschool and Primary Scale of Intelligence –III at 4 years of  
6 age[132]. Internal consistency reliability and test re-test reliability were determined for the  
7 composite and subtest scores on the Bayley III cognitive and language scales across all ages,  
8 with higher reliability demonstrated in age groups >6 months of age[131]. The BSID-III low  
9 motor/low vision version will be used to improve validity when assessing children with mild  
10 to moderate motor and/or vision impairment[133]. While the Bayley IV is now available[134]  
11 the Bayley III will be used in this study to compare this Indigenous cohort to other non-  
12 Indigenous Australian cohorts[135]. A trained professional is required to administer the  
13 assessment, average time taken to complete varies with age and ranges from approximately 50  
14 – 90mins[131,136].  
15  
16  
17  
18  
19

### 20 ***The Pediatric Evaluation of Disability Inventory-computer adaptive test (PEDI-CAT):***

21  
22 Developmental outcomes in self-care, mobility and social function will be assessed at 12  
23 months CA using the PEDI-CAT, a standardised, norm-referenced assessment of independence  
24 in self-care[137]. The PEDI-CAT has been designed for use from birth to 21 years of age and  
25 has been Rasch analysed in children with disability and typical development[137]. The  
26 instrument measures functional outcomes across four domains, daily activities, the ability to  
27 perform living skills, mobility, the ability to move around the home and in the community, and,  
28 social/cognitive the ability to participate and effectively engage in social situations.  
29 Responsibility, the fourth domain, will not be assessed in this study[137]. The tool is  
30 administered via a web-based application (Q-global), allowing parents/caregivers to self-report  
31 their child's independence on each domain. The PEDI-CAT uses an item bank which  
32 automatically lowers the number of test items dependent on how the child is scoring[137,138].  
33 Items are scored on a 4-point difficulty scale with responses ranging from unable to easy.  
34 Normative scores are reported as a T-score and an age percentile range (<5<sup>th</sup>, 5<sup>th</sup> – 25<sup>th</sup>). The  
35 PEDI-CAT has good discriminant validity in CP populations, between children with and  
36 without disability, and, demonstrates concurrent validity with the Wee-FIM in children with  
37 brain injury and developmental disabilities[139-141]. The PEDI-CAT is frequently used as an  
38 assessment to determine entry and allocation of resources for children entering the Australian  
39 National Disability Insurance Scheme (NDIS)[142]. The test is valid, reliable and responsive  
40 in this population, takes 10-15 minutes to complete, and test administration requires no formal  
41 training[141,143].  
42  
43  
44  
45  
46  
47  
48

### 49 ***Infant Toddler Social and Emotional Assessment (ITSEA)***

50  
51 The ITSEA is a 168 item, parent-report questionnaire designed to evaluate social-emotional  
52 and behavioural competencies and difficulties in infants aged 12 months to 3 years old[144].  
53 The instrument measures items across four behavioural domains; externalising, internalising,  
54 dysregulation and competencies. Items are scored on a 3-point (0-2) scale, not true/rarely (0),  
55 somewhat true/sometimes (1), and, very true often (2)[144]. The ITSEA is discriminative  
56 between high and low risk infants with social-emotional difficulties at 12 months of age[145],  
57 and demonstrates strong test-re test reliability ( $\alpha=.75-.91$ )[146].  
58  
59  
60

## 2. Diagnostic assessments

At 12 months CA infants will be assessed by a paediatrician who will complete a medical assessment for differential diagnosis (**Supplementary S2: LEAP-CP 12-month Medical Assessment**) including documenting the presence of ASD and FASD symptomology. Functional severity, motor type and distribution of CP will be ascertained for infants who have a confirmed or high-risk diagnosis of CP.

### ***Diagnosis of Cerebral Palsy***

Confirmed or high risk CP will be diagnosed according to published guidelines[147-149], based on clinical history (LEAP-CP Medical checklist) and videoed HINE and PDMS-2 assessments.

### **Motor type and distribution**

Motor type will be classified as spastic, dystonic, ataxic, choreoathetosis, mixed CP or unclassifiable according to Surveillance of Cerebral Palsy in Europe (SPCE) guidelines [148]. Motor distribution will be classified by number of limbs impaired and uni- or bi-lateral distribution by an independent assessor.

### **Functional severity**

The Gross Motor Functional Classification System (GMFCS) has validity, reliability and stability for the classification and prediction of motor function of children with CP aged 2-12 years[150-152]. The GMFCS extended and revised version, 0-2 year descriptors, will be used to classify the gross motor abilities of infants at 12 months CA[153]. The GMFCS has been correlated with CP motor type and distribution[154].

The Mini Manual Abilities Classification Scale (MACS) is used to classify hand function and abilities in children aged 0-4 years and is the gold standard for classifying infant's ability to handle objects in daily activities[155]. An independent assessor will use videos to observe and classify children in one of five functional categories for each scale.

### ***ASD symptomology***

The Autism Observation Scale for Infants (AOSI) will be used to measure ASD symptomology at 12 months CA [156]. The AOSI, a semi-structured observational tool, was designed to assess the presence and emergence of specific ASD related behaviours in infants aged 6-18 months[71,156]. The experimenter led tool assesses 18 items, individual item scores range from 0-3 and are combined to obtain a total score, with higher scores indicating elevated risk of ASD behaviours[71]. The presence of 7 or more risk markers at 12 months was 52% sensitive and 74% specific for an ASD diagnosis at 3 years[75]. The AOSI differentiates between high-risk and low-risk infants at 12-18 months[73,75,76,157]. Inter-rater reliability for individual items and total scores is excellent (0.92 and 0.93, respectively) at 12 months and test-retest reliability is acceptable[71].

### ***FASD symptomology***

### **Assessment of PAE**

The Alcohol Use Disorders Identification Test- Consumption (AUDIT-C) will be used to ascertain the potential level of fetal risk associated with maternal alcohol use during pregnancy (pre- and post-pregnancy recognition). The validated, sex-specific version of the instrument

comprises three questions as a standardised method of assessing maternal alcohol consumption [158,159]. An AUDIT-C score of  $\geq 5$  or a reported consumption of 5 or more standard drinks on one occasion is associated with increased risk of FASD[88,159].

### **Sentinel Facial features**

Clinical assessment of facial features will be completed via direct measurement (where possible) and/or assessed from a photograph, analysed using the University of Washington facial analysis software[160]. Smooth philtrum and thin upper lip will be assessed using the University of Washington Caucasian or African American (depending on what is individually appropriate) lip-philtrum guide (1 or 2), where a rank of 4 or 5 meets criteria for FASD sentinel facial features. The Scandinavian (Stromland) chart will be utilised to measure palpebral fissure length where a result of  $\geq 2$  SD below the mean ( $< 3^{\text{rd}}$  percentile) is significant [88,161]. Standard frontal and oblique facial photographs will be analysed using the FAS Facial Photographic Analysis Software for facial dysmorphology assessment[160].

### **Severe Neurodevelopmental Impairment**

Assessment of impairment will target five of the ten neurodevelopmental domains that reflect known areas of brain function affected by PAE[88]. Infant's neurological, motor, cognitive, language and adaptive and social skills will be assessed using standardized outcome measures at 12 months CA. Severe impairment will be defined as score of  $\geq 2$  SD below the mean, or equivalent, on the HINE (neurological), PDMS-2 (motor), Bayley III (cognitive and language scales), PEDI-CAT (adaptive/social) and ITSEA (behaviour)[88]. Infants with a head circumference less than  $< 3^{\text{rd}}$  centile and/or abnormal brain imaging including structural brain abnormalities will also be considered as criteria for severe brain structure/neurological impairment[88]. Presence and severity of impairment will be determined by assessors blinded to the infant's clinical history and predictor assessment outcomes.

### **Special considerations for infants**

In children under 6 years of age with all 3 sentinel facial features and microcephaly a diagnosis of FASD with 3 Sentinel Facial Features can be made, regardless of confirmed PAE and in the absence of severe neurodevelopment impairment in 3 domains. In the absence of microcephaly, children under 6 years of age with all 3 sentinel facial features are considered 'at risk of FASD', whether PAE is confirmed or unknown[88].

## **3. Parent/Caregiver**

### ***Depression Anxiety Stress Scale (DASS-21)***

Parent or primary caregiver mental health status will be assessed at two time-points (screening stage 2 and infant 12-month outcomes) using the DASS-21, a 21-item, self-reported tool designed to measure the presence of the negative emotional states of depression, anxiety and stress[162]. Individual items assess the presence of symptoms across 3 subscales (depression, anxiety and stress). Participants use a 4-point scale to reflect and rate the extent to which they have experienced each symptom over the past week. Item scores are combined to determine the severity; normal, mild, moderate, severe or extremely severe, for each emotional state[162]. The DASS-21 has demonstrated concurrent validity with the Beck depression and anxiety inventories[163,164] and has been utilised in a population of Indigenous mothers to assess maternal emotional wellbeing[165].

## Co-Variates and Descriptive measures

### *Perinatal Data*

An extensive record of antenatal, birth history and the neonatal course will be collected at the time of infant enrolment from medical records (See **Supplementary S1: LEAP-CP Medical checklist**). Data collected will include:

- i. Demographic data including gestational age, birth weight, sex and multiple birth status.
- ii. Perinatal events that signify complications during labour and delivery, indicating increased risk of adverse NDO.
- iii. Neonatal medical complications associated with adverse NDOs including early brain injury, infection, necrotising enterocolitis, respiratory distress, bronchopulmonary dysplasia, postnatal infant steroid therapy, neonatal surgery, retinopathy of prematurity, prolonged use of oxygen and feeding status at discharge.
- iv. Maternal risk factors that may impact neonatal outcomes, including, antenatal medical complications and treatment, medical conditions (diabetes mellitus, epilepsy), antenatal substance use, mental health status and family history of adverse NDOs.

### *Clinical neuroimaging*

Cranial Ultrasound (CUS) and MRI assessment findings will be collected and retrieved from Hospital records. Abnormal MRI, including white matter injury, cortical and grey matter lesions and brain maldevelopments may be indicative of neuroanatomy abnormalities predictive of adverse NDOs[45]. MRI findings will be utilised in the diagnostic process for CP and symptomology of FASD.

### *Demographic data*

Demographic data will be collected at two time points:

The LEAP-CP Medical Checklist: Part 2 (**Supplementary S1**), completed at study enrolment, details information regarding family structure and supports, primary language spoken at home, maternal and paternal education, and employment status. The Social Risk Index (SRI) and the AUDIT-C questionnaire will be embedded into this document to ascertain level of family social risk and infant PAE[159,166].

The LEAP-CP Medical Resource form (**Supplementary S3**), completed at or prior to the 12-month CA appointment, to provide information regarding their child's development, access to services and eligibility and/or access to NDIS funding.

### *Social Risk Index (SRI)*

The 12-point SRI measures six aspects of social status; family structure, language spoken at home, maternal age at birth and primary caregiver education, occupation and income. Risk items are scored from 0-2, with a lower score associated with lower risk. Overall family risk scores will be classified as lower ( $\leq 1$ ) or higher social risk ( $> 2$ ) [167,168]

## **DATA MANAGEMENT AND ANALYSIS PLAN**

All data will be entered into a REDcap database by ID number (re-identifiable). Data analysis will be carried out using Stata v16.0[169] statistical software package . Predictor and outcome variables will be identified as continuous, categorical or binary. Analysis will explore means,

1  
2  
3 variability and distributions of continuous variables and the rate of occurrence and distribution  
4 of binary variables. Infants will be categorised at 12 months CA as at risk of specific NDD, (i)  
5 CP, (ii) ASD, (iii) FASD (as defined by the presence of disorder specific symptomology)  
6 and/or (iv) adverse NDO (non-specific, defined as  $>2SD$  below the mean or equivalent on 1  
7 developmental domain and/ or  $>1SD$  below mean in  $\geq 2$  domains), or (v) typically developing  
8 ( $\leq 1SD$  below the mean or equivalent on all developmental domains) or borderline (mild delay;  
9 between 1 and  $2SD$  below the mean on 1 domain). Logistic regression analysis (binary  
10 outcomes), linear regression (continuous outcomes) and multinomial logistic regression  
11 (categorical outcomes) will be used to determine any associations between predictor and  
12 outcome variables. Diagnostic statistics, including sensitivity, specificity, positive and negative  
13 predictive values and accuracy of the predictive assessments (GMA, MOS, HINE, RNDA and  
14 ASQ-TRAK) will be determined with 95% confidence intervals based on an outcome of 'at  
15 risk' of specific NDD, (i) CP, (ii) ASD, (iii) FASD and/or (iv) adverse NDO (non-specific) at  
16 12 months CA. Perinatal variables, social and environmental data, caregiver mental health  
17 outcomes (DASS-21) and clinical neuroimaging will be utilised as descriptive measures and  
18 covariates in regression models.  
19  
20  
21  
22  
23  
24  
25

## 26 **DISCUSSION**

27 Results of this study will inform service delivery of follow-up pathways for Indigenous infants  
28 at risk of adverse NDOs and their families. Our findings will inform culturally sensitive  
29 practice and enable clinicians to select both clinically meaningful and culturally appropriate  
30 tools to identify Indigenous infants at high risk of adverse NDOs at an earlier age. Early  
31 detection will fast track families to access early intervention services for Indigenous infants  
32 and families and enable early referral to the targeted motor and cognitive training in the LEAP-  
33 CP clinical trial (trial registration: ACTRN12619000969167) and or mainstream allied health  
34 services to promote optimal outcomes.  
35  
36  
37

### 38 **Strengths and Limitations**

39  
40 Infants will be recruited early to establish discharge pathways and a follow up plan, with local  
41 services. Engagement, and established connections with local health services will enable  
42 locally trained Indigenous CHWs to assist in the screening process for infants and families  
43 living remotely, with support provided via telehealth as required. Culturally adapted resources,  
44 developed in partnership with Indigenous co-investigators and consumers, will be utilised to  
45 facilitate safe and sensitive communication and practices throughout the screening and  
46 diagnostic process for infants and families. This study aims to foster local Indigenous  
47 workforce capacity through skill development and training opportunities and build upon  
48 current models of care to enable feasible and sustainable early detection programs for 'at risk'  
49 Indigenous infants. Assisting existing services to implement culturally appropriate screening  
50 programs will ensure these strategies and pathways can be embedded into regular service  
51 delivery models at the conclusion of the study.  
52

53 The cultural, geographical and language barriers within this study present potential limitations  
54 and confounding factors. The ability to follow up Indigenous infants who live remotely may  
55 be a challenge, as remote locality is a reality for many QLD Indigenous communities, which  
56 limits ability to access health services. Infants who are identified as low risk following  
57  
58  
59  
60

1  
2  
3 screening may be less likely to attend their 12-month CA follow up appointment, impacting  
4 study retention. In addition, challenges in recruitment and retention of health professionals in  
5 remote communities may further limit physical access to these services.  
6  
7

### 8 **Ethics and Dissemination of findings**

9  
10 Ethics committee approvals were obtained from the appropriate Indigenous ethics/governance  
11 committees (see acknowledgements). There are no known health or safety risks associated with  
12 participation in any aspect of the described study. Cultural adaptations will be made to all  
13 resources and throughout the study families will be given the option to verbally discuss any  
14 questions or concerns with an ILO or CHW to ensure comprehension of concepts, cultural and  
15 language barriers are addressed. Families can withdraw their child from the study at any time  
16 without explanation, without any penalty from staff at the treating or referring hospital or health  
17 service, or any effect on their child's care. Data collected in this study will be securely stored  
18 in a coded re-identifiable form (by ID number at the University of QLD). Summary data of  
19 outcome measures will be shared with the treating clinician and/or team with the  
20 parent/caregiver's permission.  
21  
22  
23  
24

25 Findings of this study will be of interest to medical, allied health and community health  
26 workers, working with Indigenous infants and families in urban, rural and remote communities.  
27 Findings will be disseminated via peer-reviewed publications, conference presentations,  
28 clinical practice guidelines outlining culturally appropriate screening tools and sensitively  
29 communicating a diagnosis and resources including culturally adapted factsheets.  
30  
31  
32  
33  
34  
35  
36  
37  
38  
39  
40  
41  
42  
43  
44  
45  
46  
47  
48  
49  
50  
51  
52  
53  
54  
55  
56  
57  
58  
59  
60

## ABBREVIATIONS

|    |            |                                                                       |
|----|------------|-----------------------------------------------------------------------|
| 1  |            |                                                                       |
| 2  |            |                                                                       |
| 3  |            |                                                                       |
| 4  |            |                                                                       |
| 5  | AOSI       | Autism Observation Schedule in Infants                                |
| 6  |            |                                                                       |
| 7  | ASD        | Autism Spectrum Disorder                                              |
| 8  |            |                                                                       |
| 9  | ASQ-TRAK   | Ages and Stages – Aboriginal adaptation                               |
| 10 |            |                                                                       |
| 11 | AUDIT-C    | Alcohol Use Disorders Identification Test- Consumption                |
| 12 |            |                                                                       |
| 13 | Baby Moves | General Movements smartphone application                              |
| 14 | BSID-III   | Bayley Scales of Infant and Toddler Development – Third Edition       |
| 15 |            |                                                                       |
| 16 | CA         | Corrected age                                                         |
| 17 |            |                                                                       |
| 18 | CHW        | Community Health Worker                                               |
| 19 |            |                                                                       |
| 20 | CP         | Cerebral Palsy                                                        |
| 21 |            |                                                                       |
| 22 | CUS        | Cranial Ultrasound                                                    |
| 23 |            |                                                                       |
| 24 | DASS-21    | Depression Anxiety Stress Scale                                       |
| 25 |            |                                                                       |
| 26 | FASD       | Fetal Alcohol Spectrum Disorder                                       |
| 27 |            |                                                                       |
| 28 | GMA        | General Movements Assessment                                          |
| 29 |            |                                                                       |
| 30 | HHS        | Hospital and Health services                                          |
| 31 |            |                                                                       |
| 32 | HINE       | Hammersmith Infant Neurological Examination                           |
| 33 |            |                                                                       |
| 34 | ILO        | Indigenous Liaison Officer                                            |
| 35 |            |                                                                       |
| 36 | ITSEA      | Infant Toddler Social-Emotional Assessment                            |
| 37 |            |                                                                       |
| 38 | LBW        | Low Birth Weight                                                      |
| 39 |            |                                                                       |
| 40 | MRI        | Magnetic Resonance Imaging                                            |
| 41 |            |                                                                       |
| 42 | NDD        | Neurodevelopmental Disorder                                           |
| 43 |            |                                                                       |
| 44 | NDO        | Neurodevelopmental Outcome                                            |
| 45 |            |                                                                       |
| 46 | NDI        | Neurodevelopmental Impairment                                         |
| 47 |            |                                                                       |
| 48 | NICU       | Neonatal Intensive Care Unit                                          |
| 49 |            |                                                                       |
| 50 | PAE        | Prenatal Alcohol Exposure                                             |
| 51 |            |                                                                       |
| 52 | PNN        | Post neonatal                                                         |
| 53 |            |                                                                       |
| 54 | PDMS-2     | Peabody Developmental Motor Scales – 2 <sup>nd</sup> Edition          |
| 55 |            |                                                                       |
| 56 | PEDI-CAT   | Pediatric Evaluation of Disability Inventory - Computer Adaptive Test |
| 57 |            |                                                                       |
| 58 | RNDA       | Rapid Neurodevelopmental Assessment                                   |
| 59 |            |                                                                       |
| 60 | SCN        | Special Care Nursery                                                  |
|    |            |                                                                       |
|    | SGA        | Small for Gestational Age                                             |
|    |            |                                                                       |
|    | SRI        | Social Risk Index                                                     |

### **COMPETING INTERESTS**

The authors declare they have no competing interests.

### **AUTHOR'S CONTRIBUTIONS**

Ms Luke had substantial input into study design, ethics applications and was the lead author for the protocol manuscript. she will take a lead role in the recruitment, data collection and analysis of the study.

Dr Benfer had substantial input to the study design including methods and key outcome measures, ethics applications and engagement with key community leaders. She provided feedback and revision throughout manuscript development.

Ms Mick-Ramsamy lead the cultural engagement with key community stakeholders for the study. She lead the cultural adaptations and contributed to the cultural voice of the manuscript. She provided feedback and revision throughout manuscript development.

Dr Ware lead the statistical design and analysis component of the paper and contributed to the study design in particular sample size and statistical analysis. He provided feedback and revision throughout manuscript development.

Dr Reid contributed in particular to the FASD diagnostic and symptomology design and component of the manuscript. She also provided key insight to working with First Nations communities. She provided feedback and revision throughout manuscript development.

Dr Bos provided expert consultation regarding the use of the general movements assessment in particular the more detailed analysis using the motor optimality score. He provided key additions to the manuscript and study design and will continue to work as a consultant for the study. He provided feedback and revision throughout manuscript development.

Dr Bosanquet is part of Ms Luke's PhD advisory team, she provided key input into the study design and methodology in the context of regional Queensland. Her contributions regarding rehabilitation medicine were integral to the manuscript development. She provided feedback and revision throughout manuscript development.

Prof Boyd is Ms Luke's primary advisor and provided key input into the study design. She provided high level feedback and revision throughout the manuscript development and signed off on final revisions. Ms Boyd led the engagement with Leeann Mick-Ramsamy with First Nations communities and was integral to all parts of the study including ethics applications.

### **COLLABORATOR CONTRIBUTIONS**

Collaborators who have provided assistance with patient care and data collection: Apunipima Cape York Health Council, Gidgee Healing, Gurriny Yealamucka Health Service Aboriginal Corporation, Townsville HHS, Cairns and Hinterland HHS, Children's Health Queensland HHS



## ACKNOWLEDGEMENTS

The LEAP-CP program received ethical approval from the Far North Queensland Health Research Ethics Committee (HREC/2019/QCH/50533 (Sep ver 2) - 1370), the Townsville HHS Human Research Ethics Committee (HREC/QTHS/56008), the University of Queensland Medical Research Ethics Committee (2020000185/HREC/2019/QCH/50533), and the Children's Health Queensland HHS Human Research Ethics Committee (HREC/20/QCHQ/63906) and research governance approval from the Apunipima Cape York Health Council Research Governance Committee (03/2019) and Gurriny Yealamucka Health Services Aboriginal Corporation (12/2020).

We acknowledge the key contributions of the Aboriginal and Torres Strait Islander peoples who have engaged, provided consultation and co-design to the cultural framework and study design and have shared knowledge to ensure the cultural sensitivity and safety of the program, to reflect key concepts of being, knowing and doing. In particular key community stakeholders from Gurriny Yealamucka health service, Apunipima Cape York Health council and community members with lived experience who have shared their stories and expertise. We acknowledge the support of the Queensland Cerebral Palsy and Rehabilitation Research Centre clinical research team (Ms Anya Gordon, Ms Lucy Fogarty, Ms Donna Fallon, Ms Chloe Taifalos, Ms Ellena Oakes, Ms Sarah Gibson, Ms Bernadette Shannon, Ms Kym Morris and Ms Christine Finn) for their clinical inputs and role as advanced General Movements assessors.

### **Funding statement:**

The LEAP-CP detection study is supported by project grants awarded by the Research Foundation, Cerebral Palsy Alliance; PHD02619 (CL), PG05318 (KB), the National Health and Medical Research Council; Investigator grant 1195602 (RB), Australia Early Career Fellowship 1145212 (KB), NHMRC-EU Horizon Grant 11941280 (KB/RB), Perpetual IMPACT Philanthropy grant IPAP2020/0808 (RB), Children's Health QLD 50276 (KB), The University of Queensland PhD RTP scholarship (CL)

**Trial Registration:** ACTRN12619000969167

**Web address of trial:** <http://www.ANZCTR.org.au/ACTRN12614000480684.aspx>

## REFERENCES

1. Menzies K. Understanding the Australian Aboriginal experience of collective, historical and intergenerational trauma. *Int Soc Work* 2019;62(6):1522-34. doi: 10.1177/0020872819870585 [published Online First: 2019/09/26]
2. Griffiths K, Coleman C, Lee V, et al. How colonisation determines social justice and Indigenous health—a review of the literature. *J Popul Res* 2016;33(1):9-30. doi: 10.1007/s12546-016-9164-1 [published Online First: 2016/04/04]
3. Gilroy J, Donnelly, M., Colmar, S., Parmenter, T.,. Twelve factors that can influence the participation of Aboriginal people in disability services. *Australian Indigenous Health Bulletin* 2016; 16(1). <http://healthbulletin.org.au/articles/twelve-factors-that-can-influence-the-participation-of-aboriginal-people-in-disability-services> (accessed July 16, 2020).
4. Australian Institute of Health and Welfare. The health and welfare of Australia's Aboriginal and Torres Strait Islander peoples: 2015. Canberra: AIHW, 2015.
5. Australian Bureau of Statistics. Aboriginal and Torres Strait Islander People with Disability. Canberra: ABS, 2017.
6. Lilley R, Sedgwick, M., and Pellicano, E.,. "We Look After Our Own Mob": Aboriginal and Torres Strait Islander Experiences of Autism. Sydney, Australia: Macquarie University, 2019.
7. DiGiacomo M, Delaney P, Abbott P, et al. 'Doing the hard yards': carer and provider focus group perspectives of accessing Aboriginal childhood disability services. *BMC Health Serv Res* 2013;13:326. doi: 10.1186/1472-6963-13-326 [published Online First: 2013/08/21]
8. Blair E, Watson L, O'Kearney E, et al. Comparing risks of cerebral palsy in births between Australian Indigenous and non-Indigenous mothers. *Dev Med Child Neurol* 2016;58(S2):36-42. doi: 10.1111/dmcn.13005 [published Online First: 19/01/2016]
9. Ou L, Chen J, Hillman K, et al. The comparison of health status and health services utilisation between Indigenous and non-Indigenous infants in Australia. *Aust N Z J Public Health* 2010;34(1):50-56. doi: 10.1111/j.1753-6405.2010.00473.x [published Online First: 19/02/2010]
10. Fitzpatrick JP, Latimer J, Olson HC, et al. Prevalence and profile of Neurodevelopment and Fetal Alcohol Spectrum Disorder (FASD) amongst Australian Aboriginal children living in remote communities. *Res Dev Disabil* 2017;65:114-26. doi: <https://doi.org/10.1016/j.ridd.2017.04.001> [published Online First: 09/05/2017]
11. DiGiacomo M, Davidson PM, Abbott P, et al. Childhood disability in Aboriginal and Torres Strait Islander peoples: a literature review. *Int J Equity Health* 2013;12(1):7. doi: 10.1186/1475-9276-12-7 [published Online First: 18/01/2013]
12. Bishop D, Pine D, Scott S, et al. Rutter's child and adolescent psychiatry: John Wiley & Sons 2009.
13. Accardo J, Shapiro BK. Neurodevelopmental Disabilities: Beyond the Diagnosis. *Semin Pediatr Neurol* 2005;12(4):242-49. doi: <https://doi.org/10.1016/j.spn.2005.12.006> [published Online First: 10/06/2006]
14. McDonald J, Webster V, Knight J, et al. The Gudaga Study: Development in 3-year-old urban Aboriginal children. *Journal of Paediatrics and Child Health* 2014;50(2):100-06. doi: 10.1111/jpc.12476 [published Online First: 27/12/2013]
15. Bourke J, de Klerk N, Smith T, et al. Population-Based Prevalence of Intellectual Disability and Autism Spectrum Disorders in Western Australia: A Comparison With Previous Estimates. *Medicine (Baltimore)* 2016;95(21):e3737. doi: 10.1097/md.0000000000003737 [published Online First: 2016/05/27]
16. Australian Institute of Health and Welfare. Australia's mothers and babies 2018: in brief. Perinatal statistics series no.36. Cat. no. PER 108. Canberra: AIHW, 2020.
17. Commonwealth of Australia Department of the Prime Minister and Cabinet. Closing the Gap Report 2020.
18. Van Hus J, Potharst ES, Jeukens-Visser M, et al. Motor impairments in very preterm-born children: links with other developmental deficits at 5 years of age. *Developmental Medicine & Child Neurology* 2013 doi: DOI: 10.1111/dmcn.12295 [published Online First: 21st August 2013]
19. de Kieviet JF, Piek JP, Aarnoudse-Moens CS, et al. Motor development in very preterm and very low-birth-weight children from birth to adolescence: a meta-analysis. *Jama* 2009;302(20):2235-42. doi: 10.1001/jama.2009.1708 [published Online First: 2009/11/26]
20. Saigal S, Doyle LW. An overview of mortality and sequelae of preterm birth from infancy to adulthood. *The Lancet* 2008;371(9608):261-69. doi: [http://dx.doi.org/10.1016/S0140-6736\(08\)60136-1](http://dx.doi.org/10.1016/S0140-6736(08)60136-1) [published Online First: 18/01/2008]
21. Doyle LW. Evaluation of neonatal intensive care for extremely low birth weight infants in Victoria over two decades: II. Efficiency. *Pediatrics* 2004;113(3 Pt 1):510-4. doi: 10.1542/peds.113.3.510 [published Online First: 2004/03/03]

22. Williams J, Lee KJ, Anderson PJ. Prevalence of motor-skill impairment in preterm children who do not develop cerebral palsy: a systematic review. *Dev Med Child Neurol* 2010;52(3):232-7. doi: 10.1111/j.1469-8749.2009.03544.x [published Online First: 2009/12/17]
23. Milner KM, Neal EFG, Roberts G, et al. Long-term neurodevelopmental outcome in high-risk newborns in resource-limited settings: a systematic review of the literature. *Paediatr Int Child Health* 2015;35(3):227-42. doi: 10.1179/2046905515Y.0000000043 [published Online First: 03/07/2015]
24. Gibberd AJ, Simpson JM, Jones J, et al. A large proportion of poor birth outcomes among Aboriginal Western Australians are attributable to smoking, alcohol and substance misuse, and assault. *BMC Pregnancy Childbirth* 2019;19(1):110. doi: 10.1186/s12884-019-2252-4 [published Online First: 02/04/2019]
25. Comino E, Knight J, Webster V, et al. Risk and Protective Factors for Pregnancy Outcomes for Urban Aboriginal and Non-Aboriginal Mothers and Infants: The Gudaga Cohort. *Maternal & Child Health Journal* 2012;16(3):569-78. doi: 10.1007/s10995-011-0789-6
26. Kildea S, Gao Y, Hickey S, et al. Reducing preterm birth amongst Aboriginal and Torres Strait Islander babies: A prospective cohort study, Brisbane, Australia. *EClinicalMedicine* 2019;12(9):43-51. doi: 10.1016/j.eclinm.2019.06.001 [published Online First: 24/06/2019]
27. Westrupp EM, D'Esposito F, Freemantle J, et al. Health outcomes for Australian Aboriginal and Torres Strait Islander children born preterm, low birthweight or small for gestational age: A nationwide cohort study. *PLoS One* 2019;14(2):e0212130. doi: 10.1371/journal.pone.0212130 [published Online First: 2019/02/21]
28. McInerney C, Ibiebele I, Ford JB, et al. Benefits of not smoking during pregnancy for Australian Aboriginal and Torres Strait Islander women and their babies: a retrospective cohort study using linked data. *BMJ Open* 2019;9(11):e032763. doi: 10.1136/bmjopen-2019-032763 [published Online First: 2019/11/23]
29. Homer CS, Foureur MJ, Allende T, et al. 'It's more than just having a baby' women's experiences of a maternity service for Australian Aboriginal and Torres Strait Islander families. *Midwifery* 2012;28(4):E449-55. doi: 10.1016/j.midw.2011.06.004 [published Online First: 2011/08/09]
30. D'Aprano AL, Carapetis, Jr., Andrews R. Trial of a developmental screening tool in remote Australian Aboriginal communities: A cautionary tale. *J Paediatr Child Health* 2011;47(1-2):12-17. doi: 10.1111/j.1440-1754.2010.01883.x [published Online First: 26/10/2010]
31. Nishimura T, Takei N, Tsuchiya KJ, et al. Identification of neurodevelopmental trajectories in infancy and of risk factors affecting deviant development: a longitudinal birth cohort study. *Int J Epidemiol* 2016;45(2):543-53. doi: 10.1093/ije/dyv363 [published Online First: 13/02/2016]
32. Talbott MR, Miller MR. Future Directions for Infant Identification and Intervention for Autism Spectrum Disorder from a Transdiagnostic Perspective. *J Clin Child Adolesc Psychol* 2020;49(5):688-700. doi: 10.1080/15374416.2020.1790382 [published Online First: 23/07/2020]
33. Johnson MH, Gliga T, Jones E, et al. Annual research review: Infant development, autism, and ADHD--early pathways to emerging disorders. *J Child Psychol Psychiatry* 2015;56(3):228-47. doi: 10.1111/jcpp.12328 [published Online First: 2014/10/01]
34. Finlay-Jones A, Varcin K, Leonard H, et al. Very Early Identification and Intervention for Infants at Risk of Neurodevelopmental Disorders: A Transdiagnostic Approach. *Child Dev Perspect* 2019;13(2):97-103. doi: <https://doi.org/10.1111/cdep.12319> [published Online First: 08/01/2019]
35. Einspieler C, Sigafos J, Bolte S, et al. Highlighting the first 5 months of life: General movements in infants later diagnosed with autism spectrum disorder or Rett Syndrome. *Res Autism Spectr Disord* 2014;8(3):286-91. doi: 10.1016/j.rasd.2013.12.013 [published Online First: 2014/03/01]
36. Fjortoft T, Brandal M, Brubakk A, et al. Maternal alcohol and drug use during pregnancy affects the motor behaviour and general movements of infants aged 3-4 months. *Early Hum Dev* 2020;151:105171. doi: 10.1016/j.earlhumdev.2020.105171 [published Online First: 19/08/2020]
37. Romeo DM, Cowan FM, Haataja L, et al. Hammersmith Infant Neurological Examination for infants born preterm: predicting outcomes other than cerebral palsy. *Dev Med Child Neurol* 2020 doi: <https://doi.org/10.1111/dmcn.14768> [published Online First: 18/12/2020]
38. Hedgecock JB, Dannemiller LA, Shui AM, et al. Associations of Gross Motor Delay, Behavior, and Quality of Life in Young Children With Autism Spectrum Disorder. *Physical therapy* 2018;98(4):251-59. doi: 10.1093/ptj/pzy006 [published Online First: 2018/01/13]
39. Lim YH, Licari M, Spittle AJ, et al. Early Motor Function of Children With Autism Spectrum Disorder: A Systematic Review. *Pediatrics* 2021;147(2):e2020011270. doi: 10.1542/peds.2020-011270 [published Online First: 01/02/2021]
40. Report of the Australian Cerebral Palsy Register: birth years 1995-2012, November 2018.
41. Rosenbaum P, Paneth N, Leviton A, et al. A report: the definition and classification of cerebral palsy April 2006. *Dev Med Child Neurol* 2007;49(109):8-14. doi: 10.1111/j.1469-8749.2007.tb12610.x [published Online First: 23/06/2009]

42. Novak I, Morgan C, Fahey M, et al. State of the Evidence Traffic Lights 2019: Systematic Review of Interventions for Preventing and Treating Children with Cerebral Palsy. *Curr Neurol Neurosci Rep* 2020;20(2) doi: 10.1007/s11910-020-1022-z [published Online First: 21/02/2020]
43. Galea C, McIntyre S, Smithers-Sheedy H, et al. Cerebral palsy trends in Australia (1995-2009): a population-based observational study. *Dev Med Child Neurol* 2019;61(2):186-93. doi: 10.1111/dmcn.14011 [published Online First: 06/09/2018]
44. Novak I, Morgan C, Adde L, et al. Early, Accurate Diagnosis and Early Intervention in Cerebral Palsy: Advances in Diagnosis and Treatment. *JAMA Pediatr* 2017;171(9):897-907. doi: 10.1001/jamapediatrics.2017.1689 [published Online First: 2017/07/18]
45. Bosanquet M, Copeland L, Ware R, et al. A systematic review of tests to predict cerebral palsy in young children. *Dev Med Child Neurol* 2013;55(5):418-26. doi: 10.1111/dmcn.12140 [published Online First: 2013/04/12]
46. Morgan C, Romeo DM, Chorna O, et al. The Pooled Diagnostic Accuracy of Neuroimaging, General Movements, and Neurological Examination for Diagnosing Cerebral Palsy Early in High-Risk Infants: A Case Control Study. *J Clin Med* 2019;8(11):1879. doi: 10.3390/jcm8111879 [published Online First: 05/11/2019]
47. Einspieler C, Prechtl H, Bos A, et al. Prechtl's Method on the Qualitative Assessment of General Movements in Preterm Term and Young Infants: Cambridge University Press, Mac Keith Press, Clinics in Developmental Medicine 2004.
48. Prechtl HF, Einspieler C, Cioni G, et al. An early marker for neurological deficits after perinatal brain lesions. *The Lancet* 1997;349(9062):1361-63. doi: 10.1016/S0140-6736(96)10182-3 [published Online First: 10/05/1997]
49. Hadders-Algra M, Bouwstra H, Groen SE. Quality of general movements and psychiatric morbidity at 9 to 12 years. *Early human development* 2009;85(1):1-6. doi: 10.1016/j.earlhumdev.2008.05.005
50. Peyton C, Einspieler C. General Movements: A Behavioral Biomarker of Later Motor and Cognitive Dysfunction in NICU Graduates. *Pediatr Ann* 2018;47(4):e159-e64. doi: 10.3928/19382359-20180325-01 [published Online First: 2018/04/19]
51. Zappella M, Einspieler C, Bartl-Pokorny KD, et al. What do home videos tell us about early motor and socio-communicative behaviours in children with autistic features during the second year of life — An exploratory study. *Early Hum Dev* 2015;91(10):569-75. doi: 10.1016/j.earlhumdev.2015.07.006 [published Online First: 31/07/2015]
52. Hay K, Nelin M, Carey H, et al. Hammersmith Infant Neurological Examination Asymmetry Score Distinguishes Hemiplegic Cerebral Palsy From Typical Development. *Pediatr Neurol* 2018;87:70-74. doi: <https://doi.org/10.1016/j.pediatrneurol.2018.07.002> [published Online First: 25/07/2018]
53. Romeo DMM, Guzzetta A, Scoto M, et al. Early neurologic assessment in preterm-infants: Integration of traditional neurologic examination and observation of general movements. *European journal of paediatric neurology* 2008;12(3):183-89. doi: 10.1016/j.ejpn.2007.07.008
54. Romeo DMM, Cioni M, Palermo F, et al. Neurological assessment in infants discharged from a neonatal intensive care unit. *Eur J Paediatr Neurol* 2013;17(2):192-98. doi: <https://doi.org/10.1016/j.ejpn.2012.09.006> [published Online First: 10/10/2012]
55. Ricci D, Cowan F, Pane M, et al. Neurological examination at 6 to 9 months in infants with cystic periventricular leukomalacia. *Neuropediatrics* 2006;37(4):247-52. doi: 10.1055/s-2006-924581 [published Online First: 2006/12/21]
56. Frisone MF, Mercuri E, Laroche S, et al. Prognostic value of the neurologic optimality score at 9 and 18 months in preterm infants born before 31 weeks' gestation. *J Pediatr* 2002;140(1):57-60. doi: 10.1067/mpd.2002.119626 [published Online First: 2002/01/30]
57. Einspieler C, Utsch F, Brasil P, et al. Association of Infants Exposed to Prenatal Zika Virus Infection With Their Clinical, Neurologic, and Developmental Status Evaluated via the General Movement Assessment Tool. *JAMA Netw Open* 2019;2(1):e187235. doi: 10.1001/jamanetworkopen.2018.7235 [published Online First: 2019/01/19]
58. Zang FF, Yang H, Han Q, et al. Very low birth weight infants in China: the predictive value of the motor repertoire at 3 to 5 months for the motor performance at 12 months. *Early Hum Dev* 2016;100:27-32. doi: 10.1016/j.earlhumdev.2016.03.010 [published Online First: 2016/07/09]
59. Martin T, McIntyre S, Badawi N, et al. A birds-eye view of the landscape of cerebral palsy for Aboriginal and Torres Strait Islander children in Australia. *Dev Med Child Neurol* 2020;62:38. doi: 10.1111/dmcn.14469 [published Online First: 01/03/2020]
60. Forbes-Coe A, Jones A, Crowe M, et al. Perinatal factors that contribute to the prevalence of cerebral palsy in Townsville, North Queensland. *J Neonatal Nurs* 2018;24(4):208-12. doi: <https://doi.org/10.1016/j.jnn.2017.11.017> [published Online First: 12/01/2018]

- 1
- 2
- 3
- 4 61. American Psychiatric Association. Diagnostic and Statistical Manual of Mental Disorders. 5th ed.
- 5 Washington, DC2013.
- 6 62. Armstrong E, Jokel A. Language Outcomes for Preverbal Toddlers with Autism. 2012;4 doi:
- 7 10.3968/j.sll.1923156320120403.3528
- 8 63. Australian Bureau of Statistics. Autism in Australia, 2015. Australia, 2017.
- 9 64. Bent CA, Dissanayake C, Barbaro J. Mapping the diagnosis of autism spectrum disorders in children aged
- 10 under 7 years in Australia, 2010-2012. *Med J Aust* 2015;202(6):317-20. doi: 10.5694/mja14.00328
- 11 [published Online First: 2015/04/04]
- 12 65. May T, Brignell A, Williams K. Autism Spectrum Disorder Prevalence in Children Aged 12–13 Years From
- 13 the Longitudinal Study of Australian Children. *Autism Research* 2020;13(5):821-27. doi:
- 14 10.1002/aur.2286 [published Online First: 02/03/2020]
- 15 66. Flanagan JE, Landa R, Bhat A, et al. Head lag in infants at risk for autism: a preliminary study. *Am J Occup*
- 16 *Ther* 2012;66(5):577-85. doi: 10.5014/ajot.2012.004192 [published Online First: 2012/08/25]
- 17 67. Esposito G, Venuti P, Maestro S, et al. An exploration of symmetry in early autism spectrum disorders:
- 18 Analysis of lying. *Brain Dev* 2009;31(2):131-38. doi: 10.1016/j.braindev.2008.04.005 [published
- 19 Online First: 014/06/2008]
- 20 68. Teitelbaum P, Teitelbaum O, Nye J, et al. Movement analysis in infancy may be useful for early diagnosis of
- 21 autism. *Proc Natl Acad Sci U S A* 1998;95(23):13982-7. doi: 10.1073/pnas.95.23.13982 [published
- 22 Online First: 1998/11/13]
- 23 69. Franchini M, Duku E, Armstrong V, et al. Variability in Verbal and Nonverbal Communication in Infants at
- 24 Risk for Autism Spectrum Disorder: Predictors and Outcomes. *J Autism Dev Disord* 2018;48(10):3417-
- 25 31. doi: 10.1007/s10803-018-3607-9 [published Online First: 16/05/2018]
- 26 70. Barbaro J, Dissanayake C. Early markers of autism spectrum disorders in infants and toddlers prospectively
- 27 identified in the Social Attention and Communication Study. *Autism* 2012;17(1):64-86. doi:
- 28 10.1177/1362361312442597 [published Online First: 26/06/2012]
- 29 71. Bryson SE, Zwaigenbaum L, McDermott C, et al. The Autism Observation Scale for Infants: Scale
- 30 Development and Reliability Data. *J Autism Dev Disord* 2008;38(4):731-38. doi: 10.1007/s10803-007-
- 31 0440-y [published Online First: 17/09/2007]
- 32 72. Bedford R, Gliga T, Shephard E, et al. Neurocognitive and observational markers: prediction of autism
- 33 spectrum disorder from infancy to mid-childhood. *Mol Autism* 2017;8:49. doi: 10.1186/s13229-017-
- 34 0167-3 [published Online First: 2017/10/12]
- 35 73. Gammer I, Bedford R, Elsabbagh M, et al. Behavioural markers for autism in infancy: scores on the Autism
- 36 Observational Scale for Infants in a prospective study of at-risk siblings. *Infant Behav Dev*
- 37 2015;38:107-15. doi: 10.1016/j.infbeh.2014.12.017 [published Online First: 2015/02/07]
- 38 74. Zwaigenbaum L, Bryson S, Rogers T, et al. Behavioral manifestations of autism in the first year of life. *Int J*
- 39 *Dev Neurosci* 2005;23(2-3):143-52. doi: 10.1016/j.ijdevneu.2004.05.001 [published Online First:
- 40 02/06/2004]
- 41 75. Zwaigenbaum L, Bryson SE, Brian J, et al. Assessment of Autism Symptoms From 6 to 18 Months of Age
- 42 Using the Autism Observation Scale for Infants in a Prospective High-Risk Cohort. *Child Dev* 2020
- 43 doi: <https://doi.org/10.1111/cdev.13485> [published Online First: 25/12/2020]
- 44 76. Brian J, Bryson SE, Garon N, et al. Clinical assessment of autism in high-risk 18-month-olds. *Autism*
- 45 2008;12(5):433-56. doi: 10.1177/1362361308094500 [published Online First: 2008/09/23]
- 46 77. Teitelbaum O, Benton T, Shah PK, et al. Eshkol-Wachman movement notation in diagnosis: the early
- 47 detection of Asperger's syndrome. *Proc Natl Acad Sci U S A* 2004;101(32):11909-14. doi:
- 48 10.1073/pnas.0403919101 [published Online First: 2004/07/30]
- 49 78. Hadders-Algra M, Bouwstra H, Groen SE. Quality of general movements and psychiatric morbidity at 9 to
- 50 12 years. *Early Hum Dev* 2009;85(1):1-6. doi: 10.1016/j.earlhumdev.2008.05.005 [published Online
- 51 First: 20/06/2008]
- 52 79. Squires J, Bricker D. Ages and Stages Questionnaires, Third Edition (ASQ-3): A Parent-Completed Child
- 53 Monitoring System. Baltimore: Paul H. Brookes Publishing Co., Inc. 2009.
- 54 80. Khan NZ, Muslima H, Begum D, et al. Validation of rapid neurodevelopmental assessment instrument for
- 55 under-two-year-old children in Bangladesh. *Pediatrics* 2010;125(4):e755-e62. doi: 10.1542/peds.2008-
- 56 3471 [published Online First: 22/03/2010]
- 57 81. Bailey B, Arciuli J. Indigenous Australians with autism: A scoping review. *Autism*
- 58 2020;1362361319894829. doi: 10.1177/1362361319894829 [published Online First: 13/01/2020]
- 59 82. Roy M, Balaratnasingam S. Missed Diagnosis of Autism in an Australian Indigenous Psychiatric Population.
- 60 *Australas Psychiatry* 2010;18(6):534-37. doi: 10.3109/10398562.2010.498048 [published Online First:

- 1
- 2
- 3
- 4 83. Leonard H, Glasson E, Nassar N, et al. Autism and Intellectual Disability Are Differentially Related to
- 5 Sociodemographic Background at Birth. *PLOS ONE* 2011;6(3):e17875. doi:
- 6 10.1371/journal.pone.0017875 [published Online First: 30/03/2011]
- 7 84. Lilley R, Sedgwick M, Pellicano E. Inclusion, acceptance, shame and isolation: Attitudes to autism in
- 8 Aboriginal and Torres Strait Islander communities in Australia. *Autism* 2020;24(7):1860-73. doi:
- 9 10.1177/1362361320928830 [published Online First: 12/06/2020]
- 10 85. Lange S, Rovet J, Rehm J, et al. Neurodevelopmental profile of Fetal Alcohol Spectrum Disorder: A
- 11 systematic review.(Report). *BMC Psychol* 2017;5(1) doi: 10.1186/s40359-017-0191-2 [published
- 12 Online First: 23/06/2017]
- 13 86. Sokol RJ, Delaney-Black V, Nordstrom B. Fetal Alcohol Spectrum Disorder. *JAMA* 2003;290(22):2996-99.
- 14 doi: 10.1001/jama.290.22.2996 [published Online First: 10/12/2003]
- 15 87. Cook JL, Green CR, Lilley CM, et al. Fetal alcohol spectrum disorder: a guideline for diagnosis across the
- 16 lifespan. *CMAJ* 2016;188(3):191-97. doi: 10.1503/cmaj.141593 [published Online First: 2015/12/17]
- 17 88. Bower C, Elliott E, on behalf of the steering group. Report to the Australian Government Department of
- 18 Health: "Australian Guide to the diagnosis of Fetal Alcohol Spectrum Disorder (FASD)", 2016.
- 19 89. Popova S, Lange S, Shield K, et al. Comorbidity of fetal alcohol spectrum disorder: a systematic review and
- 20 meta-analysis. *The Lancet* 2016;387(10022):978-87. doi: [https://doi.org/10.1016/S0140-](https://doi.org/10.1016/S0140-6736(15)01345-8)
- 21 [6736\(15\)01345-8](https://doi.org/10.1016/S0140-6736(15)01345-8) [published Online First: 06/01/2016]
- 22 90. Reid N, Hayes N, Young SB, et al. Caregiver-reported physical health status of children and young people
- 23 with fetal alcohol spectrum disorder. *Journal of Developmental Origins of Health and Disease* 2020:1-
- 24 8. doi: 10.1017/S2040174420000537 [published Online First: 2020/06/09]
- 25 91. Streissguth PA, Bookstein LF, Barr MH, et al. Risk Factors for Adverse Life Outcomes in Fetal Alcohol
- 26 Syndrome and Fetal Alcohol Effects. *J Dev Behav Pediatr* 2004;25(4):228-38. doi: 10.1097/00004703-
- 27 200408000-00002 [published Online First: 01/08/2004]
- 28 92. Popova S, Lange S, Burd L, et al. The Economic Burden of Fetal Alcohol Spectrum Disorder in Canada in
- 29 2013. *Alcohol and Alcoholism* 2016;51(3):367-75. doi: 10.1093/alcalc/agg117
- 30 93. Popova S, Stade B, Bekmuradov D, et al. What Do We Know about the Economic Impact of Fetal Alcohol
- 31 Spectrum Disorder? A Systematic Literature Review. *Alcohol Alcohol* 2011;46(4):490-97. doi:
- 32 10.1093/alcalc/agr029 [published Online First: 22/04/2011]
- 33 94. Reid N. Fetal alcohol spectrum disorder in Australia: What is the current state of affairs? *Drug Alcohol Rev*
- 34 2018;37(7):827-30. doi: 10.1111/dar.12855 [published Online First: 15/08/2018]
- 35 95. Wynn A, Rotheram-Borus MJ, Davis E, et al. Identifying fetal alcohol spectrum disorder among South
- 36 African children at aged 1 and 5 years. *J Alcohol Drug Depend* 2020;217:108266. doi:
- 37 <https://doi.org/10.1016/j.drugalcdep.2020.108266> [published Online First: 30/08/2020]
- 38 96. Reid N, Shelton D, Warner J, et al. Profile of children diagnosed with a fetal alcohol spectrum disorder: A
- 39 retrospective chart review. *Drug Alcohol Rev* 2017;36(5):677-81. doi: 10.1111/dar.12519 [published
- 40 Online First: 23/03/2017]
- 41 97. Bower C, Watkins RE, Mutch RC, et al. Fetal alcohol spectrum disorder and youth justice: a prevalence
- 42 study among young people sentenced to detention in Western Australia. *BMJ Open* 2018;8(2):e019605.
- 43 doi: 10.1136/bmjopen-2017-019605 [published Online First: 31/02/2018]
- 44 98. Fitzpatrick JP, Latimer J, Carter M, et al. Prevalence of fetal alcohol syndrome in a population-based sample
- 45 of children living in remote Australia: the Lililwan Project. *J Paediatr Child Health* 2015;51(4):450-7.
- 46 doi: 10.1111/jpc.12814 [published Online First: 2015/01/17]
- 47 99. Lange S, Probst C, Gmel G, et al. Global Prevalence of Fetal Alcohol Spectrum Disorder Among Children
- 48 and Youth: A Systematic Review and Meta-analysis. *JAMA Pediatr* 2017;171(10):948-56. doi:
- 49 10.1001/jamapediatrics.2017.1919 [published Online First: 21/08/2017]
- 50 100. Williamson A, Gibberd A, Hanly MJ, et al. Social and emotional developmental vulnerability at age five in
- 51 Aboriginal and non-Aboriginal children in New South Wales: a population data linkage study. *Int J*
- 52 *Equity Health* 2019;18(1):120. doi: 10.1186/s12939-019-1019-x [published Online First: 31/07/2019]
- 53 101. von Elm E, Altman DG, Egger M, et al. The Strengthening the Reporting of Observational Studies in
- 54 Epidemiology (STROBE) statement: guidelines for reporting observational studies. *The Lancet*
- 55 2007;370(9596):1453-57. doi: 10.1016/S0140-6736(07)61602-X [published Online First: 20/10/2007]
- 56 102. Popova S, Lange S, Shield K, et al. Prevalence of fetal alcohol spectrum disorder among special
- 57 subpopulations: a systematic review and meta-analysis. *Addiction* 2019;114(7):1150-72. doi:
- 58 10.1111/add.14598 [published Online First: 2019/04/29]
- 59 103. Spittle AJ, Olsen J, Kwong A, et al. The Baby Moves prospective cohort study protocol: using a
- 60 smartphone application with the General Movements Assessment to predict neurodevelopmental
- outcomes at age 2 years for extremely preterm or extremely low birthweight infants. *BMJ Open*
- 2016;6(10):e013446. doi: 10.1136/bmjopen-2016-013446 [published Online First: 2016/10/05]

- 1  
2  
3 104. Einspieler C, Bos AF, Kriebler-Tomantschger M, et al. Cerebral Palsy: Early Markers of Clinical Phenotype  
4 and Functional Outcome. *J Clin Med* 2019;8(10) doi: 10.3390/jcm8101616 [published Online First:  
5 25/08/2019]
- 6 105. Olsen JE, Cheong JLY, Eeles AL, et al. Early general movements are associated with developmental  
7 outcomes at 4.5–5 years. *Early Hum Dev* 2020;148:105115. doi:  
8 <https://doi.org/10.1016/j.earlhumdev.2020.105115> [published Online First: 20/06/2020]
- 9 106. Phagava H, Muratori F, Einspieler C, et al. General movements in infants with autism spectrum disorders.  
10 *Georgian Med News* 2008; (156). <https://europepmc.org/article/med/18403821> (accessed 08/08/2020).
- 11 107. Kwong AKL, Olsen JE, Eeles AL, et al. Occurrence of and temporal trends in fidgety general movements  
12 in infants born extremely preterm/extremely low birthweight and term-born controls. *Early Hum Dev*  
13 2019;135:11-15. doi: <https://doi.org/10.1016/j.earlhumdev.2019.05.018> [published Online First:  
14 08/06/2019]
- 15 108. Bruggink JL, Cioni G, Einspieler C, et al. Early motor repertoire is related to level of self-mobility in  
16 children with cerebral palsy at school age. *Dev Med Child Neurol* 2009;51(11):878-85. doi:  
17 10.1111/j.1469-8749.2009.03294.x [published Online First: 2009/05/07]
- 18 109. Yang H, Einspieler C, Shi W, et al. Cerebral palsy in children: movements and postures during early  
19 infancy, dependent on preterm vs. full term birth. *Early Hum Dev* 2012;88(10):837-43. doi:  
20 10.1016/j.earlhumdev.2012.06.004 [published Online First: 2012/07/17]
- 21 110. Bruggink JLM, Einspieler C, Butcher PR, et al. Quantitative aspects of the early motor repertoire in  
22 preterm infants: Do they predict minor neurological dysfunction at school age? *Early Hum Dev*  
23 2009;85(1):25-36. doi: 10.1016/j.earlhumdev.2008.05.010 [published Online First: 08/08/2008]
- 24 111. Butcher PR, Van Braeckel K, Bouma A, et al. The quality of preterm infants' spontaneous movements: an  
25 early indicator of intelligence and behaviour at school age. *J Child Psychol and Psychiatry*  
26 2009;50(8):920-30. doi: 10.1111/j.1469-7610.2009.02066.x [published Online First: 16/07/2009]
- 27 112. Fjørtoft T, Grunewaldt KH, Løhaugen GCC, et al. Assessment of motor behaviour in high-risk-infants at 3  
28 months predicts motor and cognitive outcomes in 10 years old children. *Early Hum Dev*  
29 2013;89(10):787-93. doi: <https://doi.org/10.1016/j.earlhumdev.2013.06.007> [published Online First:  
30 11/07/2013]
- 31 113. Haataja L, Mercuri E, Regev R, et al. Optimality score for the neurologic examination of the infant at 12  
32 and 18 months of age. *J Pediatr* 1999;135(2):153-61. doi: 10.1016/S0022-3476(99)70016-8 [published  
33 Online First: 4/11/2005]
- 34 114. Romeo DM, Ricci D, Brogna C, et al. Use of the Hammersmith Infant Neurological Examination in infants  
35 with cerebral palsy: a critical review of the literature. *Dev Med Child Neurol* 2016;58:240-45. doi:  
36 10.1111/dmcn.12876 [published Online First: 25/08/2015]
- 37 115. Shanley DC, Hawkins E, Page M, et al. Protocol for the Yapatjarrathati project: a mixed-method  
38 implementation trial of a tiered assessment process for identifying fetal alcohol spectrum disorders in a  
39 remote Australian community. *BMC Health Serv Res* 2019;19(1):649. doi: 10.1186/s12913-019-4378-5  
40 [published Online First: 09/09/2019]
- 41 116. Reid N, Hawkins E, Liu W, et al. Yarning about fetal alcohol spectrum disorder: Outcomes of a  
42 community-based workshop. *Res Dev Disabil* 2020;108:103810. doi: 10.1016/j.ridd.2020.103810  
43 [published Online First: 20/11/2020]
- 44 117. Khan NZ, Muslima H, Shilpi AB, et al. Validation of rapid neurodevelopmental assessment for 2- to 5-  
45 year-old children in Bangladesh. *Pediatrics* 2013;131(2):e486-e94. doi: 10.1542/peds.2011-2421  
46 [published Online First: 01/02/2013]
- 47 118. Khan NZ, Muslima H, El Arifeen S, et al. Validation of a Rapid Neurodevelopmental Assessment Tool for  
48 5 to 9 Year-Old Children in Bangladesh. *J Pediatr* 2014;164(5):1165-70.e6. doi:  
49 10.1016/j.jpeds.2013.12.037 [published Online First: 06/02/2014]
- 50 119. Khan NZ, Muslima H. Rapid Neurodevelopmental Assessment of Children, A Practical Guide for Health  
51 Professionals: Dhaka, Bangladesh: Bangladesh Protibondhi Foundation 2012.
- 52 120. Thompson L, Peñaloza RA, Stormfields K, et al. Validation and adaptation of rapid neurodevelopmental  
53 assessment instrument for infants in Guatemala. *Child Care Health Dev* 2015;41(6):1131-39. doi:  
54 10.1111/cch.12279 [published Online First: 2015/08/06]
- 55 121. Simpson S, D'Aprano A, Tayler C, et al. Validation of a culturally adapted developmental screening tool  
56 for Australian Aboriginal children: Early findings and next steps. *Early Hum Dev* 2016;103:91-95. doi:  
57 <https://doi.org/10.1016/j.earlhumdev.2016.08.005> [published Online First: 19/08/2016]
- 58 122. D'Aprano A, editor. *Ages and Stages Questionnaires Third Edition - Guide to using the ASQ-TRAK*. third  
59 ed: Paul H. Brookes Publishing Co., 2017.
- 60 123. D'Aprano A, Silburn S, Johnston V, et al. Adaptation of the Ages and Stages Questionnaire for Remote  
Aboriginal Australia. *Qual Health Res* 2016;26(5):613-25. doi: 10.1177/1049732314562891 [published  
Online First: 08/12/2014]

124. D'Aprano A, Silburn S, Johnston V, et al. Culturally Appropriate Training for Remote Australian Aboriginal Health Workers: Evaluation of an Early Child Development Training Intervention. *J Dev Behav Pediatr* 2015;36(7):503-11. doi: 10.1097/DBP.0000000000000200 [published Online First: 01/09/2015]
125. Folio M, Fewell R. Peabody Developmental Motor Scales: Examiner's Manual. 2nd edition. Austin, Tex: PRO-ED, Inc 2000.
126. Darrach J, Piper M, Watt MJ. Assessment of gross motor skills of at-risk infants: predictive validity of the Alberta Infant Motor Scale. *Dev Med Child Neurol* 1998;40(7):485-91. doi: 10.1111/j.1469-8749.1998.tb15399.x [published Online First: 12/11/2008]
127. Connolly BH, McClune NO, Gatlin R. Concurrent validity of the Bayley-III and the Peabody Developmental Motor Scale-2. *Pediatr Phys Ther* 2012;24(4):345-52. doi: 10.1097/PEP.0b013e318267c5cf [published Online First: 2012/09/12]
128. Kolobe TH, Palisano RJ, Stratford PW. Comparison of two outcome measures for infants with cerebral palsy and infants with motor delays. *Physical therapy* 1998;78(10):1062-72. doi: 10.1093/ptj/78.10.1062 [published Online First: 1998/10/22]
129. Palisano RJ, Kolobe TH, Haley SM, et al. Validity of the Peabody Developmental Gross Motor Scale as an evaluative measure of infants receiving physical therapy. *Physical therapy* 1995;75(11):939-48; discussion 48-51. doi: 10.1093/ptj/75.11.939 [published Online First: 1995/11/01]
130. Hsiang-Hui W, Hua-Fang L, Ching-Lin H. Reliability, Sensitivity to Change, and Responsiveness of the Peabody Developmental Motor Scales-Second Edition for Children With Cerebral Palsy. *Physical therapy* 2006;86(10):1351-9. doi: 10.2522/ptj.20050259 [published Online First: 01/10/2006]
131. Bayley N. Bayley scales of infant and toddler development: PsychCorp, Pearson 2006.
132. Bode MM, D'Eugenio DB, Mettelman BB, et al. Predictive validity of the Bayley, Third Edition at 2 years for intelligence quotient at 4 years in preterm infants. *J Dev Behav Pediatr* 2014;35(9):570-5. doi: 10.1097/dbp.0000000000000110 [published Online First: 2014/11/06]
133. Visser L, Ruiter SAJ, Van der Meulen BF, et al. Validity and suitability of the Bayley-III Low Motor/Vision version: A comparative study among young children with and without motor and/or visual impairments. *Res Dev Disabil* 2013;34(11):3736-45. doi: <https://doi.org/10.1016/j.ridd.2013.07.027> [published Online First: 08/09/2013]
134. Bayley N, Aylward G. Bayley scales of infant and toddler development 4th ed. San Antonio: Harcourt 2019.
135. Elliott C, Alexander C, Salt A, et al. Early Moves: a protocol for a population-based prospective cohort study to establish general movements as an early biomarker of cognitive impairment in infants. *BMJ Open* 2021;11(4):e041695. doi: 10.1136/bmjopen-2020-041695 [published Online First: 09/04/2021]
136. Spittle AJ, Doyle LW, Boyd RN. A systematic review of the clinimetric properties of neuromotor assessments for preterm infants during the first year of life. *Dev Med Child Neurol* 2008;50(4):254-66. doi: 10.1111/j.1469-8749.2008.02025.x [published Online First: 08/01/2008]
137. Haley S, Coster W, Dumas H, et al. Accuracy and precision of the Pediatric Evaluation of Disability Inventory computer-adaptive tests (PEDI-CAT). *Dev Med Child Neurol* 2011;53(12):1100-6. doi: 10.1111/j.1469-8749.2011.04107.x [published Online First: 11/11/2011]
138. Dumas H, Fragala-Pinkham M, Haley S, et al. Item Bank Development for a Revised Pediatric Evaluation of Disability Inventory (PEDI). *Phys Occup Ther Pediatr* 2010;30(3):168-84. doi: 10.3109/01942631003640493 [published Online First: 07/07/2010]
139. Shore BJ, Allar BG, Miller PE, et al. Evaluating the Discriminant Validity of the Pediatric Evaluation of Disability Inventory: Computer Adaptive Test in Children With Cerebral Palsy. *Physical therapy* 2017;97(6):669-76. doi: 10.1093/ptj/pzx033 [published Online First: 2017/04/06]
140. Ziviani J, Ottenbacher KJ, Shephard K, et al. Concurrent Validity of the Functional Independence Measure for Children (WeeFIM<sup>TM</sup>) and the Pediatric Evaluation of Disabilities Inventory in Children with Developmental Disabilities and Acquired Brain Injuries. *Phys Occup Ther Pediatr* 2002;21(2-3):91-101. doi: 10.1080/J006v21n02\_08 [published Online First: 29/07/2009]
141. Dumas HM, Fragala-Pinkham MA, Haley SM, et al. Computer adaptive test performance in children with and without disabilities: prospective field study of the PEDI-CAT. *Disabil Rehabil* 2012;34(5):393-401. doi: 10.3109/09638288.2011.607217 [published Online First: 2011/10/13]
142. National Disability Insurance Agency. Providing evidence of disability for children 2021 [updated 22/02/2021. Available from: <https://www.ndis.gov.au/applying-access-ndis/how-apply/information-support-your-request/providing-evidence-disability-children> accessed 03/03/2021.
143. Dumas HM, Fragala-Pinkham MA, Rosen EL, et al. Pediatric Evaluation of Disability Inventory Computer Adaptive Test (PEDI-CAT) and Alberta Infant Motor Scale (AIMS): Validity and Responsiveness. *Physical therapy* 2015;95(11):1559-68. doi: 10.2522/ptj.20140339 [published Online First: 28/05/2015]



- 1  
2  
3  
4  
5  
6  
7  
8  
9  
10  
11  
12  
13  
14  
15  
16  
17  
18  
19  
20  
21  
22  
23  
24  
25  
26  
27  
28  
29  
30  
31  
32  
33  
34  
35  
36  
37  
38  
39  
40  
41  
42  
43  
44  
45  
46  
47  
48  
49  
50  
51  
52  
53  
54  
55  
56  
57  
58  
59  
60
144. Carter A, Briggs-Gowan M. ITSEA: Infant-Toddler Social and Emotional Assessment. Massachusetts: PsychCorp 2006.
  145. Sanner N, Smith L, Wentzel-Larsen T, et al. Early identification of social–emotional problems: Applicability of the Infant-Toddler Social Emotional Assessment (ITSEA) at its lower age limit. *Infant behavior & development* 2016;42:69-85. doi: 10.1016/j.infbeh.2015.11.001 [published Online First: 17/12/2015]
  146. Carter AS, Briggs-Gowan MJ, Jones SM, et al. The Infant–Toddler Social and Emotional Assessment (ITSEA): Factor Structure, Reliability, and Validity. *Journal of Abnormal Child Psychology* 2003;31(5):495-514. doi: 10.1023/A:1025449031360
  147. McIntyre S, Morgan C, Walker K, et al. Cerebral Palsy—Don't Delay. *Dev Disabil Res Rev* 2011;17(2):114-29. doi: <https://doi.org/10.1002/ddrr.1106> [published Online First: 29/01/2013]
  148. Surveillance of Cerebral Palsy in Europe. Surveillance of cerebral palsy in Europe: a collaboration of cerebral palsy surveys and registers. Surveillance of Cerebral Palsy in Europe (SCPE). *Dev Med Child Neurol* 2000;42(12):816-24. doi: 10.1017/s0012162200001511 [published Online First: 2000/12/29]
  149. Smithers-Sheedy H, Badawi N, Blair E, et al. What constitutes cerebral palsy in the twenty-first century? *Dev Med Child Neurol* 2014;56(4):323-8. doi: 10.1111/dmcn.12262 [published Online First: 2013/10/12]
  150. Palisano R, Rosenbaum P, Walter S, et al. Development and reliability of a system to classify gross motor function in children with cerebral palsy. *Dev Med Child Neurol* 1997;39(4):214-23. doi: 10.1111/j.1469-8749.1997.tb07414.x [published Online First: 1997/04/01]
  151. Wood E, Rosenbaum P. The gross motor function classification system for cerebral palsy: a study of reliability and stability over time. *Dev Med Child Neurol* 2000;42(5):292-6. doi: 10.1017/s0012162200000529 [published Online First: 2000/06/16]
  152. Oeffinger DJ, Tytkowski CM, Rayens MK, et al. Gross Motor Function Classification System and outcome tools for assessing ambulatory cerebral palsy: a multicenter study. *Dev Med Child Neurol* 2004;46(5):311-9. doi: 10.1017/s0012162204000519 [published Online First: 2004/05/11]
  153. Palisano RJ, Rosenbaum P, Bartlett D, et al. Content validity of the expanded and revised Gross Motor Function Classification System. *Dev Med Child Neurol* 2008;50(10):744-50. doi: 10.1111/j.1469-8749.2008.03089.x [published Online First: 2008/10/07]
  154. Gorter JW, Rosenbaum PL, Hanna SE, et al. Limb distribution, motor impairment, and functional classification of cerebral palsy. *Dev Med Child Neurol* 2004;46(7):461-7. doi: 10.1017/s0012162204000763 [published Online First: 2004/07/03]
  155. Eliasson AC, Ullenhag A, Wahlström U, et al. Mini-MACS: development of the Manual Ability Classification System for children younger than 4 years of age with signs of cerebral palsy. *Dev Med Child Neurol* 2017;59(1):72-78. doi: 10.1111/dmcn.13162 [published Online First: 2016/06/09]
  156. Bryson S, Zwaigenbaum L. Autism Observation Scale for Infants. In: Patel V, Preedy V, Martin C, eds. Comprehensive guide to autism. 1st ed. New York: Springer-Verlag 2014:299-310.
  157. Georgiades S, Szatmari P, Zwaigenbaum L, et al. A prospective study of autistic-like traits in unaffected siblings of probands with autism spectrum disorder. *JAMA psychiatry* 2013;70(1):42-8. doi: 10.1001/2013.jamapsychiatry.1 [published Online First: 2012/09/05]
  158. Bradley KA, Kivlahan DR, Williams EC. Brief approaches to alcohol screening: practical alternatives for primary care. *J Gen Intern Med* 2009;24(7):881. doi: 10.1007/s11606-009-1014-9 [published Online First: 03/06/2009]
  159. O'Leary CM, Bower C, Zubrick SR, et al. A new method of prenatal alcohol classification accounting for dose, pattern and timing of exposure: improving our ability to examine fetal effects from low to moderate alcohol. *J Epidemiol Community Health* 2010;64(11):956-62. doi: 10.1136/jech.2009.091785 [published Online First: 2009/10/22]
  160. Astley-Hemingway SJ, Bledsoe JM, Brooks A, et al. Comparison of the 4-Digit Code, Canadian 2015, Australian 2016 and Hoyme 2016 fetal alcohol spectrum disorder diagnostic guidelines. *Adv Pediatr Res* 2019;6(2):31. doi: 10.35248/2385-4529.19.6.31 [published Online First: 2019/10/17]
  161. Tsang TW, Laing-Aiken Z, Latimer J, et al. Digital assessment of the fetal alcohol syndrome facial phenotype: reliability and agreement study. *BMJ Paediatr Open* 2017;1(1):e000137. doi: 10.1136/bmjpo-2017-000137 [published Online First: 11/09/2017]
  162. Lovibond SH, Lovibond PF. Manual for the Depression Anxiety Stress Scales. 2nd. Ed. ed. Sydney: Psychology Foundation 1995.
  163. Lovibond PF, Lovibond SH. The structure of negative emotional states: comparison of the Depression Anxiety Stress Scales (DASS) with the Beck Depression and Anxiety Inventories. *Behaviour research and therapy* 1995;33(3):335-43. doi: 10.1016/0005-7967(94)00075-u [published Online First: 1995/03/01]

- 1  
2  
3 164. Brown TA, Chorpita BF, Korotitsch W, et al. Psychometric properties of the Depression Anxiety Stress  
4 Scales (DASS) in clinical samples. *Behaviour research and therapy* 1997;35(1):79-89. doi:  
5 10.1016/s0005-7967(96)00068-x [published Online First: 1997/01/01]  
6 165. Yelland J, Sutherland G, Brown SJ. Postpartum anxiety, depression and social health: findings from a  
7 population-based survey of Australian women. *BMC Public Health* 2010;10(1):771. doi:  
8 10.1186/1471-2458-10-771  
9 166. Bush K, Kivlahan DR, McDonell MB, et al. The AUDIT Alcohol Consumption Questions (AUDIT-C): An  
10 Effective Brief Screening Test for Problem Drinking. *Arch Intern Med* 1998;158(16):1789-95. doi:  
11 10.1001/archinte.158.16.1789 [published Online First: 27/01/1998]  
12 167. Spittle AJ, Ferretti C, Anderson PJ, et al. Improving the outcome of infants born at <30 weeks' gestation - a  
13 randomized controlled trial of preventative care at home. *BMC Pediatrics* 2009;9(1):73. doi:  
14 10.1186/1471-2431-9-73 [published Online First: 03/12/2009]  
15 168. Roberts G, Howard K, Spittle AJ, et al. Rates of early intervention services in very preterm children with  
16 developmental disabilities at age 2 years. *J Paediatr Child Health* 2008;44(5):276-80. doi:  
17 10.1111/j.1440-1754.2007.01251.x [published Online First: 12/11/2007]  
18 169. StataCorp LLC. Stata Statistical Software: Release 16 College Station, TX: StataCorp LLC; 2019  
19 [Available from: <https://www.stata.com/> accessed 10/12/2020.  
20  
21  
22  
23  
24  
25  
26  
27  
28  
29  
30  
31  
32  
33  
34  
35  
36  
37  
38  
39  
40  
41  
42  
43  
44  
45  
46  
47  
48  
49  
50  
51  
52  
53  
54  
55  
56  
57  
58  
59  
60

1  
2  
3  
4  
5  
6  
7  
8  
9  
10  
11  
12  
13  
14  
15  
16  
17  
18  
19  
20  
21  
22  
23  
24  
25  
26  
27  
28  
29  
30  
31  
32  
33  
34  
35  
36  
37  
38  
39  
40  
41  
42  
43  
44  
45  
46  
47  
48  
49  
50  
51  
52  
53  
54  
55  
56  
57  
58  
59  
60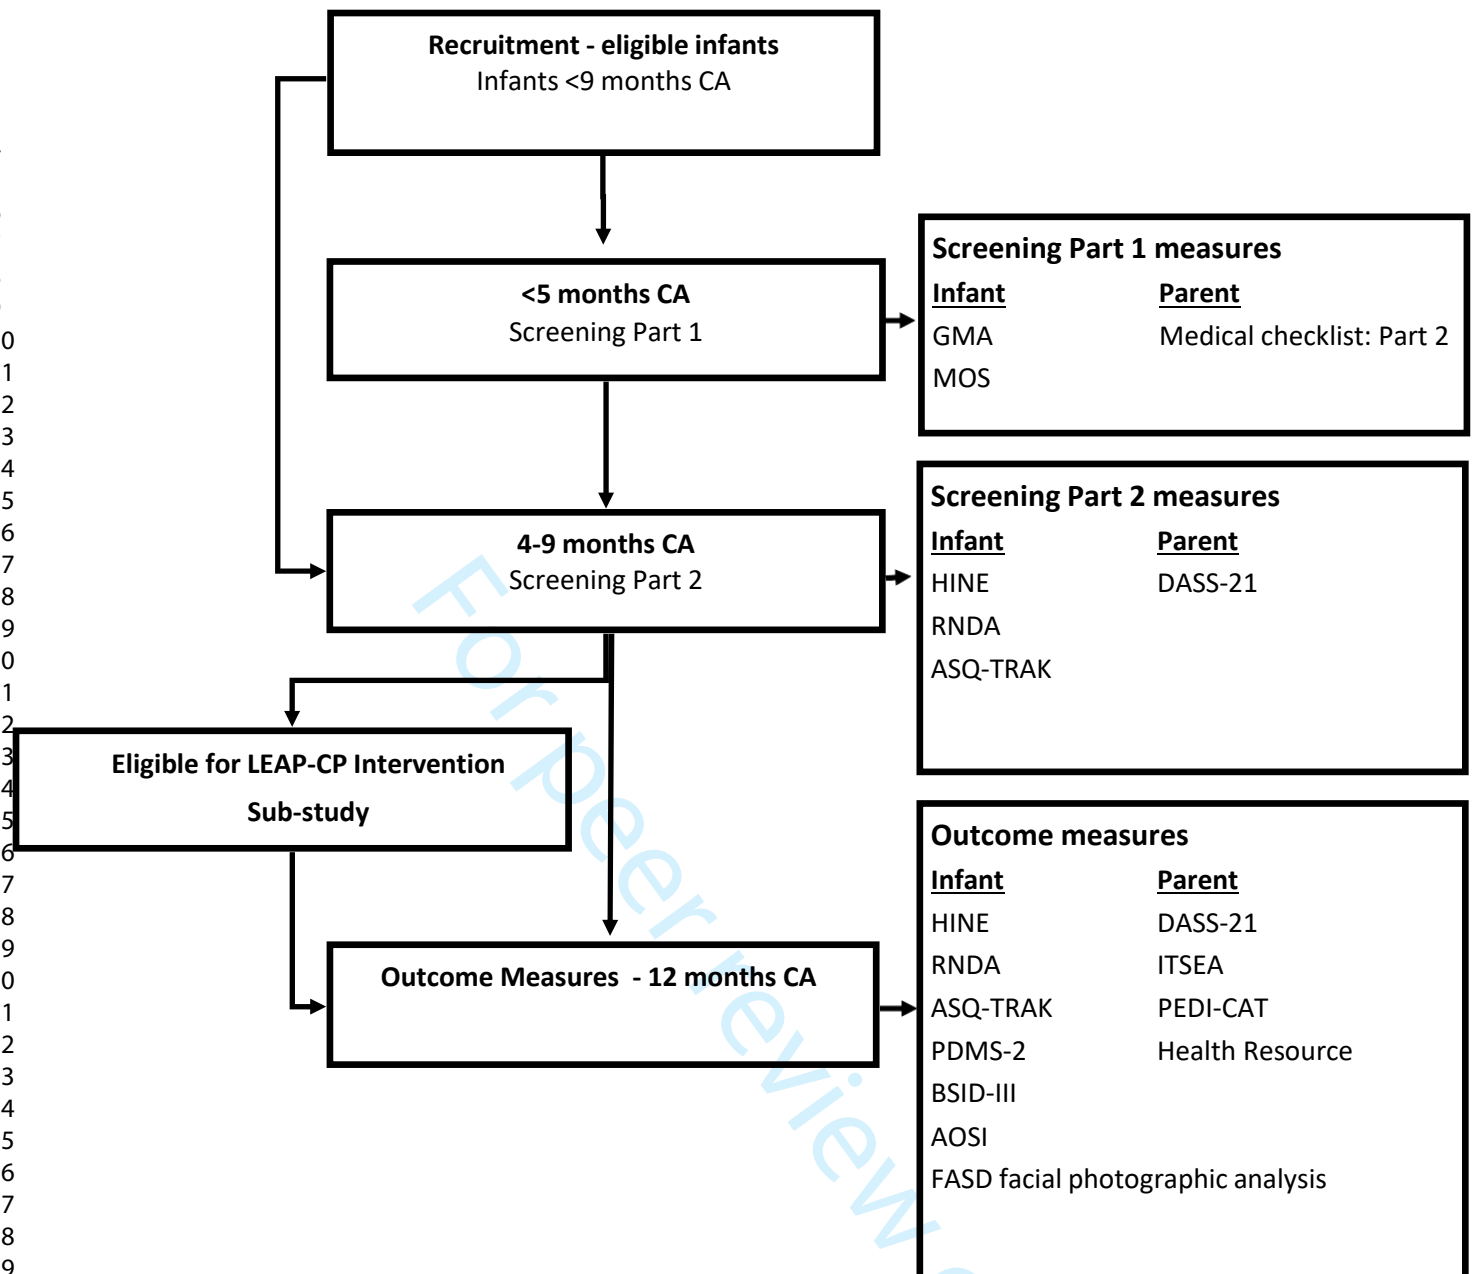

**Figure 1:** LEAP-CP prospective cohort study timeline

Key: GMA= Prechtl's General Movements Assessment, MOS= General Movements Assessment Motor Optimality Score, HINE= Hammersmith Infant Neurological Examination, RNDA= Rapid Neurodevelopmental Assessment, ASQ-TRAK= Ages and Stages Questionnaire-Aboriginal Adaptation, PMDS-2= Peabody Developmental Motor Scales 2<sup>nd</sup> Edition, BSID-III= Bayley Scales of Infant Development 3<sup>rd</sup> Edition, PEDI-CAT= Pediatric Evaluation of Disability Inventory - computer adaptive test, AOSI= Autism Observation Schedule in Infants, FASD facial photographic analysis, DASS-21= Depression Anxiety Stress Scale, ITSEA= Infant Toddler Social Emotional Assessment

## Supplementary Information

### S1: LEAP-CP Medical checklist: Part 1 and 2

Study ID: □□□

Date: □□/□□/□□□□

Form completed by:

Interviewer initials: □□

#### Part 1: Perinatal data and Birth History – collected from Medical record

##### Infant details

|                                       |                                                                                                                                                                                                                                                |
|---------------------------------------|------------------------------------------------------------------------------------------------------------------------------------------------------------------------------------------------------------------------------------------------|
| Estimated date of delivery            |                                                                                                                                                                                                                                                |
| Date of birth                         |                                                                                                                                                                                                                                                |
| Gestational age at birth (weeks.days) |                                                                                                                                                                                                                                                |
| Maternal age at birth                 |                                                                                                                                                                                                                                                |
| Gender                                | <input type="radio"/> Male<br><input type="radio"/> Female<br><input type="radio"/> Indeterminate                                                                                                                                              |
| Multiple Births                       | <input type="radio"/> Singleton<br><input type="radio"/> Twin<br><input type="radio"/> Triplet<br><input type="radio"/> Surviving twin from multiple (eg singleton birth from triplet pregnancy, sibling died in utero or at birth)            |
| Order of birth for multiples          |                                                                                                                                                                                                                                                |
| Birthweight (grams)                   |                                                                                                                                                                                                                                                |
| Apgar at 1 minute                     |                                                                                                                                                                                                                                                |
| Apgar at 5 minutes                    |                                                                                                                                                                                                                                                |
| Resuscitation                         | <input type="radio"/> Nil (includes suction & O2 therapy)<br><input type="radio"/> Minor (bag and mask, CPAP or Hi-flow)<br><input type="radio"/> Major (intubation, CPR, adrenaline)<br><input type="radio"/> Resuscitation data not recorded |

##### Infant complications

|                                                                                    |                                                                                                                                                                                                                                |
|------------------------------------------------------------------------------------|--------------------------------------------------------------------------------------------------------------------------------------------------------------------------------------------------------------------------------|
| Respiratory (tick all that apply)                                                  | <input type="radio"/> No (includes suppl O2 for <4 hrs)<br><input type="radio"/> Requiring ongoing ventilation or CPAP<br><input type="radio"/> Pneumothorax<br><input type="radio"/> Pneumonia<br><input type="radio"/> Other |
| Other respiratory issue please specify                                             |                                                                                                                                                                                                                                |
| Chronic lung disease (O2 and or ventilatory requirement at 36 weeks corrected age) | <input type="radio"/> Yes<br><input type="radio"/> No                                                                                                                                                                          |
| Hypoxic Ischemic Encephalopathy (HIE)                                              | <input type="radio"/> Yes<br><input type="radio"/> No                                                                                                                                                                          |
| Sarnat stage or severity of HIE                                                    | <input type="radio"/> Stage 1 (mild)<br><input type="radio"/> Stage 2 (moderate)<br><input type="radio"/> Stage 3 (severe)                                                                                                     |
| Received cooling                                                                   | <input type="radio"/> Yes<br><input type="radio"/> No                                                                                                                                                                          |
| Patent ductus arteriosus (PDA)                                                     | <input type="radio"/> No<br><input type="radio"/> Yes<br><input type="radio"/> Not documented                                                                                                                                  |
| If yes to PDA, tick all that apply                                                 | <input type="radio"/> No treatment<br><input type="radio"/> Diuretics<br><input type="radio"/> Fluid restriction<br><input type="radio"/> Indomethacin/ibuprofen/paracetamol                                                   |

|                                                            |                                                                                                                                                                                                                                                                                 |
|------------------------------------------------------------|---------------------------------------------------------------------------------------------------------------------------------------------------------------------------------------------------------------------------------------------------------------------------------|
|                                                            | <input type="radio"/> Surgery                                                                                                                                                                                                                                                   |
| NEC                                                        | <input type="radio"/> No<br><input type="radio"/> Suspected (clinical signs, Xrays normal, nil by mouth &/antibiotics <5 days)<br><input type="radio"/> Definite (Xray changes, $\geq$ 5 days nil by mouth &/or triple antibiotics &/or surgery)                                |
| Seizures                                                   | <input type="radio"/> Yes<br><input type="radio"/> No                                                                                                                                                                                                                           |
| Aetiology if known                                         |                                                                                                                                                                                                                                                                                 |
| Surgery                                                    | <input type="radio"/> Yes<br><input type="radio"/> No                                                                                                                                                                                                                           |
| Please specify what surgery (tick all that apply)          | <input type="radio"/> Bowel resection<br><input type="radio"/> Inguinal hernia repair<br><input type="radio"/> Tracheostomy<br><input type="radio"/> PDA ligation<br><input type="radio"/> Rickham's reservoir<br><input type="radio"/> VP shunt<br><input type="radio"/> other |
| Other surgery, please specify                              |                                                                                                                                                                                                                                                                                 |
| Jaundice requiring exchange transfusion                    | <input type="radio"/> Yes<br><input type="radio"/> No                                                                                                                                                                                                                           |
| Major malformation or genetic syndrome                     | <input type="radio"/> Yes<br><input type="radio"/> No                                                                                                                                                                                                                           |
| Please specify                                             |                                                                                                                                                                                                                                                                                 |
| Retinopathy of Prematurity (ROP)                           | <input type="radio"/> No<br><input type="radio"/> Yes, no intervention required<br><input type="radio"/> Yes, received laser therapy<br><input type="radio"/> Yes, received Avastin (brand name for Bevacizumab)<br><input type="radio"/> Not examined                          |
| Left eye: Max stage of ROP as recorded by ophthalmologist  |                                                                                                                                                                                                                                                                                 |
| Right eye: Max stage of ROP as recorded by ophthalmologist |                                                                                                                                                                                                                                                                                 |
| Hearing Screen result                                      | <input type="radio"/> Pass<br><input type="radio"/> Referred for further examination<br><input type="radio"/> Not examined                                                                                                                                                      |
| Referred hearing result                                    |                                                                                                                                                                                                                                                                                 |

***Cranial and MRI findings Ultrasound findings (most severe reported)***

|                                                         |                                                       |
|---------------------------------------------------------|-------------------------------------------------------|
| IVH                                                     | <input type="radio"/> Yes<br><input type="radio"/> No |
| Maximum IVH grade Left                                  |                                                       |
| Maximum IVH grade Right                                 |                                                       |
| Cystic PVL                                              | <input type="radio"/> Yes<br><input type="radio"/> No |
| Please specify any other abnormal neuroimaging findings |                                                       |
| Age at time of CUS/MRI                                  |                                                       |
| Where was the CUS/MRI completed                         |                                                       |

**Discharge details**

|                                                              |                                                       |
|--------------------------------------------------------------|-------------------------------------------------------|
| LOS in hospital (days)                                       |                                                       |
| NICU<br>SCN<br>Transferred to other hospital                 |                                                       |
| Discharged home on Oxygen                                    | <input type="radio"/> Yes<br><input type="radio"/> No |
| Was the infant receiving any tube feeding on discharge home? | <input type="radio"/> Yes<br><input type="radio"/> No |

**Developmental History**

|                                                        |                                                                                                                                                                                                                                                                                                                                        |
|--------------------------------------------------------|----------------------------------------------------------------------------------------------------------------------------------------------------------------------------------------------------------------------------------------------------------------------------------------------------------------------------------------|
| Complications since birth (please tick all that apply) | <input type="radio"/> CNS infection (eg meningitis/encephalitis)<br><input type="radio"/> Head injury<br><input type="radio"/> Near drowning<br><input type="radio"/> Non-accidental injury<br><input type="radio"/> Tumour<br><input type="radio"/> CVA<br><input type="radio"/> Cerebral malformation<br><input type="radio"/> Other |
| Other, please specify                                  |                                                                                                                                                                                                                                                                                                                                        |

**Maternal details**

|                                                                                    |                                                                                                                                                                                                                                                                                                                                                                                                                                                                                                                                                                                                                                                                                           |
|------------------------------------------------------------------------------------|-------------------------------------------------------------------------------------------------------------------------------------------------------------------------------------------------------------------------------------------------------------------------------------------------------------------------------------------------------------------------------------------------------------------------------------------------------------------------------------------------------------------------------------------------------------------------------------------------------------------------------------------------------------------------------------------|
| Maternal age at delivery                                                           |                                                                                                                                                                                                                                                                                                                                                                                                                                                                                                                                                                                                                                                                                           |
| Mode of delivery                                                                   | <input type="radio"/> Vaginal<br><input type="radio"/> Caesarean – in labour<br><input type="radio"/> Caesarean – not in labour<br><input type="radio"/> Not documented                                                                                                                                                                                                                                                                                                                                                                                                                                                                                                                   |
| Specify Caesarean section                                                          | <input type="radio"/> Elective<br><input type="radio"/> Emergency                                                                                                                                                                                                                                                                                                                                                                                                                                                                                                                                                                                                                         |
| Did the infant have foetal growth restriction?                                     | <input type="radio"/> Yes<br><input type="radio"/> No                                                                                                                                                                                                                                                                                                                                                                                                                                                                                                                                                                                                                                     |
| Did the mother have any of the following medical conditions during this pregnancy? | <input type="radio"/> None<br><input type="radio"/> Pre-eclampsia<br><input type="radio"/> Essential hypertension<br><input type="radio"/> Thrombophilia<br><input type="radio"/> Diabetes - specify<br><input type="radio"/> Epilepsy<br><input type="radio"/> Respiratory - specify<br><input type="radio"/> Renal disease - specify<br><input type="radio"/> Cardiac disease - specify<br><input type="radio"/> Pulmonary - specify<br><input type="radio"/> Red cell isoimmunisation<br><input type="radio"/> Autoimmune disease - specify<br><input type="radio"/> Psychiatric (diagnosed) - specify<br><input type="radio"/> Substance use - specify<br><input type="radio"/> Other |
| Diabetes (please specify)                                                          | <input type="radio"/> Gestational<br><input type="radio"/> Type 1 diabetes<br><input type="radio"/> Type 2 diabetes                                                                                                                                                                                                                                                                                                                                                                                                                                                                                                                                                                       |
| Respiratory (please specify)                                                       |                                                                                                                                                                                                                                                                                                                                                                                                                                                                                                                                                                                                                                                                                           |

|                                                                             |                                                                                                                                                                                                                                                                                                                                                                                                                                                       |
|-----------------------------------------------------------------------------|-------------------------------------------------------------------------------------------------------------------------------------------------------------------------------------------------------------------------------------------------------------------------------------------------------------------------------------------------------------------------------------------------------------------------------------------------------|
| Renal disease (please specify)                                              |                                                                                                                                                                                                                                                                                                                                                                                                                                                       |
| Cardiac disease (please specify)                                            |                                                                                                                                                                                                                                                                                                                                                                                                                                                       |
| Pulmonary (please specify)                                                  |                                                                                                                                                                                                                                                                                                                                                                                                                                                       |
| Autoimmune (please specify)                                                 |                                                                                                                                                                                                                                                                                                                                                                                                                                                       |
| Psychiatric (please specify)                                                |                                                                                                                                                                                                                                                                                                                                                                                                                                                       |
| Substance use (please specify)                                              |                                                                                                                                                                                                                                                                                                                                                                                                                                                       |
| Other (please specify)                                                      |                                                                                                                                                                                                                                                                                                                                                                                                                                                       |
| Antepartum haemorrhage (bleeding after 20 weeks gestation)?                 | <input type="radio"/> Yes<br><input type="radio"/> No                                                                                                                                                                                                                                                                                                                                                                                                 |
| If Yes, specify at what gestation                                           |                                                                                                                                                                                                                                                                                                                                                                                                                                                       |
| Did the mother receive corticosteroids (to enhance foetal lung maturation)? | <input type="radio"/> Yes<br><input type="radio"/> No<br><input type="radio"/> Not documented                                                                                                                                                                                                                                                                                                                                                         |
| Antenatal corticosteroids (number of completed courses; 2 doses = 1 course) | <input type="radio"/> None<br><input type="radio"/> Incomplete (1 dose only)<br><input type="radio"/> 1 course<br><input type="radio"/> 2 courses<br><input type="radio"/> 3 courses<br><input type="radio"/> Information not documented                                                                                                                                                                                                              |
| Did the mother receive any intravenous magnesium sulphate                   | <input type="radio"/> No<br><input type="radio"/> Yes<br><input type="radio"/> Not documented                                                                                                                                                                                                                                                                                                                                                         |
| Duration of ruptured membranes                                              | <input type="radio"/> N/A or no data available<br><input type="radio"/> <24 hours<br><input type="radio"/> ≥24 hours                                                                                                                                                                                                                                                                                                                                  |
| Were antibiotics given?                                                     | <input type="radio"/> No<br><input type="radio"/> Yes<br><input type="radio"/> Not documented                                                                                                                                                                                                                                                                                                                                                         |
| Did any of the following intra &/or post-partum complications occur?        | <input type="radio"/> None<br><input type="radio"/> Intra-partum fever (in mother)<br><input type="radio"/> Preterm labour<br><input type="radio"/> Meconium<br><input type="radio"/> Breech<br><input type="radio"/> Shoulder dystocia<br><input type="radio"/> Delayed cry (>5 minutes after birth)<br><input type="radio"/> Lethargy or seizures within 72 hours of birth<br><input type="radio"/> Cord around neck<br><input type="radio"/> Other |
| Other, please specify                                                       |                                                                                                                                                                                                                                                                                                                                                                                                                                                       |
| Antenatal care                                                              | <input type="radio"/> Yes<br><input type="radio"/> No                                                                                                                                                                                                                                                                                                                                                                                                 |
| Number of visits                                                            |                                                                                                                                                                                                                                                                                                                                                                                                                                                       |

**Medications**

During the last 6 months has your child had medications for...

|                                |                                                    |
|--------------------------------|----------------------------------------------------|
| <b>1. Epilepsy</b>             | <input type="radio"/> Yes <input type="radio"/> No |
| A. Which medication            |                                                    |
| Frequency (per day)            | <input type="checkbox"/> <input type="checkbox"/>  |
| Dosage (per day)               | <input type="checkbox"/> <input type="checkbox"/>  |
| Duration (length of treatment) |                                                    |
| Any adverse effects?           | <input type="radio"/> Yes <input type="radio"/> No |
| B. Which medication            |                                                    |
| Frequency (per day)            | <input type="checkbox"/> <input type="checkbox"/>  |
| Dosage (per day)               | <input type="checkbox"/> <input type="checkbox"/>  |
| Duration (length of treatment) |                                                    |
| Any adverse effects?           | <input type="radio"/> Yes <input type="radio"/> No |
| C. Which medication            |                                                    |
| Frequency (per day)            | <input type="checkbox"/> <input type="checkbox"/>  |
| Dosage (per day)               | <input type="checkbox"/> <input type="checkbox"/>  |
| Duration (length of treatment) |                                                    |
| Any adverse effects?           | <input type="radio"/> Yes <input type="radio"/> No |

|                                |                                                    |
|--------------------------------|----------------------------------------------------|
| <b>2. Saliva control</b>       | <input type="radio"/> Yes <input type="radio"/> No |
| A. Which medication            |                                                    |
| Frequency (per day)            | <input type="checkbox"/> <input type="checkbox"/>  |
| Dosage (per day)               | <input type="checkbox"/> <input type="checkbox"/>  |
| Duration (length of treatment) |                                                    |
| Any adverse effects?           | <input type="radio"/> Yes <input type="radio"/> No |
| B. Which medication            |                                                    |
| Frequency (per day)            | <input type="checkbox"/> <input type="checkbox"/>  |
| Dosage (per day)               | <input type="checkbox"/> <input type="checkbox"/>  |
| Duration (length of treatment) |                                                    |
| Any adverse effects?           | <input type="radio"/> Yes <input type="radio"/> No |

|                                |                                                    |
|--------------------------------|----------------------------------------------------|
| <b>3. Other</b>                | <input type="radio"/> Yes <input type="radio"/> No |
| A. Which medication            |                                                    |
| Frequency (per day)            | <input type="checkbox"/> <input type="checkbox"/>  |
| Dosage (per day)               | <input type="checkbox"/> <input type="checkbox"/>  |
| Duration (length of treatment) |                                                    |
| Any adverse effects?           | <input type="radio"/> Yes <input type="radio"/> No |
| B. Which medication            |                                                    |
| Frequency (per day)            | <input type="checkbox"/> <input type="checkbox"/>  |
| Dosage (per day)               | <input type="checkbox"/> <input type="checkbox"/>  |
| Duration (length of treatment) |                                                    |
| Any adverse effects?           | <input type="radio"/> Yes <input type="radio"/> No |

**Co-morbidities**

|          | Parent question (based on 10Q Screen)*                                                                                                                                       | Formal assessment |
|----------|------------------------------------------------------------------------------------------------------------------------------------------------------------------------------|-------------------|
| Physical | Does your child have any serious delay in sitting, standing or walking? <input type="radio"/> Yes <input type="radio"/> No<br><br>Does your child have difficulty walking or |                   |



|                                                               |                                                                                                                                                                                                                                                                                                                                              |                                                                                                                                                                                                                                                                                                                                                                                                                                      |
|---------------------------------------------------------------|----------------------------------------------------------------------------------------------------------------------------------------------------------------------------------------------------------------------------------------------------------------------------------------------------------------------------------------------|--------------------------------------------------------------------------------------------------------------------------------------------------------------------------------------------------------------------------------------------------------------------------------------------------------------------------------------------------------------------------------------------------------------------------------------|
|                                                               | using arms or does he/ she have weakness in the arms/ legs? <input type="radio"/> Yes <input type="radio"/> No                                                                                                                                                                                                                               |                                                                                                                                                                                                                                                                                                                                                                                                                                      |
| Epilepsy/ infantile seizures (date of onset) and seizure type | Does your child sometimes have fits, become rigid, or lose consciousness? <input type="radio"/> Yes <input type="radio"/> No                                                                                                                                                                                                                 | Date of onset (from above):<br>Type of seizure (from above):<br>Defined by 2 unprovoked seizures excluding febrile or neonatal seizures<br><input type="radio"/> Generalised or partial<br><input type="radio"/> Generalised – sudden onset of seizures that compromises responsiveness and affects the whole body<br><input type="radio"/> Partial – seizures have focality therefore symptoms reflect onset in 1 part of the brain |
| Visual impairment                                             | Compared with other children, does your child have difficulty seeing, either in the daytime or at night? <input type="radio"/> Yes <input type="radio"/> No                                                                                                                                                                                  | <input type="radio"/> No<br><input type="radio"/> Diagnosed impaired<br><input type="radio"/> Suspected impaired<br><input type="radio"/> Unsure                                                                                                                                                                                                                                                                                     |
| Hearing impairment                                            | Does your child appear to have difficulty hearing? <input type="radio"/> Yes <input type="radio"/> No                                                                                                                                                                                                                                        | <input type="radio"/> No<br><input type="radio"/> Diagnosed impaired<br><input type="radio"/> Suspected impaired<br><input type="radio"/> Unsure                                                                                                                                                                                                                                                                                     |
| Intellectual impairment                                       | Does your child learn to do things like other children his/ her age? <input type="radio"/> Yes <input type="radio"/> No<br><br>Compared with other children of his/ her age, does your child appear in any way mentally backward, dull or slow? <input type="radio"/> Yes <input type="radio"/> No                                           | <input type="radio"/> No<br><input type="radio"/> Diagnosed impaired<br><input type="radio"/> Suspected impaired<br><input type="radio"/> Unsure                                                                                                                                                                                                                                                                                     |
| Communication impairment                                      | When you tell your child to do something, does he/ she seem to understand what you are saying? <input type="radio"/> Yes <input type="radio"/> No<br><br>Does your child speak at all? <input type="radio"/> Yes <input type="radio"/> No<br><br>Can your child name at least one object? <input type="radio"/> Yes <input type="radio"/> No | <input type="radio"/> No<br><input type="radio"/> Diagnosed impaired<br><input type="radio"/> Suspected impaired<br><input type="radio"/> Unsure                                                                                                                                                                                                                                                                                     |

\*10 Question Screen is a standardised parent-reported measure. Please ask these questions verbatim.

**Part 2: Socio-demographic information**

**Household Characteristics**

|                                                                                                                                            |                                                                                                                                                                                                                                              |                                |                                  |                               |                               |
|--------------------------------------------------------------------------------------------------------------------------------------------|----------------------------------------------------------------------------------------------------------------------------------------------------------------------------------------------------------------------------------------------|--------------------------------|----------------------------------|-------------------------------|-------------------------------|
| Family pedigree (3 generations)                                                                                                            | Any evidence of illness in the family; any problems with development or intellect; presence of motor disorder, congenital deformity, decreased motor function over time, in-utero/death, disease; cousin marriage, sudden/ unexplained death |                                |                                  |                               |                               |
| * Note this is not completed if biological caregiver is not involved and information is not recorded in the infant's medical record.       |                                                                                                                                                                                                                                              |                                |                                  |                               |                               |
| Family structure                                                                                                                           | 2 caregivers (nuclear)                                                                                                                                                                                                                       | Separated parents dual custody | Cared for by other intact family | Single caregiver              | Other                         |
| Birth order (of blood siblings)                                                                                                            | First born                                                                                                                                                                                                                                   | Second born                    | Third born                       | Fourth born                   | Other (specify)               |
| Child lives with                                                                                                                           | Nuclear family                                                                                                                                                                                                                               | Extended family                | Step family                      | Kinship care                  | Foster care                   |
| Family members in the house (number)                                                                                                       |                                                                                                                                                                                                                                              |                                |                                  | Adult men                     |                               |
|                                                                                                                                            |                                                                                                                                                                                                                                              |                                |                                  | Adult women                   |                               |
|                                                                                                                                            |                                                                                                                                                                                                                                              |                                |                                  | Children <18 years            |                               |
| Other relatives living close by                                                                                                            | Yes / no                                                                                                                                                                                                                                     |                                |                                  |                               |                               |
| Who regularly provides care for the child (multiple times per week)? (select as many as apply, and provide their details) Other (specify): | <b>Relationship to child:</b>                                                                                                                                                                                                                | <b>Relationship to child:</b>  | <b>Relationship to child:</b>    | <b>Relationship to child:</b> | <b>Relationship to child:</b> |
|                                                                                                                                            | Age:                                                                                                                                                                                                                                         | Age:                           | Age:                             | Age:                          | Age:                          |
|                                                                                                                                            | Highest education:                                                                                                                                                                                                                           | Highest education:             | Highest education:               | Highest education:            | Highest education:            |
|                                                                                                                                            | Occupation:                                                                                                                                                                                                                                  | Occupation:                    | Occupation:                      | Occupation:                   | Occupation:                   |
|                                                                                                                                            | Frequency of care:                                                                                                                                                                                                                           | Frequency of care:             | Frequency of care:               | Frequency of care:            | Frequency of care:            |
| Does the infant's biological mother/father identify as                                                                                     | Aboriginal                                                                                                                                                                                                                                   | Torres Strait Islander         |                                  |                               |                               |
| Primary language(s) spoken at home                                                                                                         | English only                                                                                                                                                                                                                                 | Some English                   | No English                       |                               |                               |
| Where family traditionally from?                                                                                                           | Specify language(s):                                                                                                                                                                                                                         |                                |                                  |                               |                               |
| Current postcode                                                                                                                           |                                                                                                                                                                                                                                              |                                |                                  |                               |                               |
| Distance to town (corner store)                                                                                                            | <input type="checkbox"/> <input type="checkbox"/> <input type="checkbox"/> minutes (in car)                                                                                                                                                  |                                |                                  |                               |                               |

**Employment**

|                                                  |                  |                   |                     |                |        |       |
|--------------------------------------------------|------------------|-------------------|---------------------|----------------|--------|-------|
| Who are the main earners/ workers in the family? | Grandfather      | Grandmother       | Father              | Uncle          | Mother | Other |
| Main earners' occupation/s                       |                  |                   |                     |                |        |       |
| Main earner's employment                         | Fulltime/ secure | Part-time/ casual | Unemployed/ pension | Fly in fly out |        |       |
| Does ill-health often prevent them from working? | Y                |                   | N                   |                | NA     |       |

1  
2  
3  
4  
5  
6  
7  
8  
9  
10  
11  
12  
13  
14  
15  
16  
17  
18  
19  
20  
21  
22  
23  
24  
25  
26  
27  
28  
29  
30  
31  
32  
33  
34  
35  
36  
37  
38  
39  
40  
41  
42  
43  
44  
45  
46  
47  
48  
49  
50  
51  
52  
53  
54  
55  
56  
57  
58  
59  
60**Alcohol use in early pregnancy (AUDIT-C)\***

|                                                                                                              |                                                                                                                                                                                                                                                            |
|--------------------------------------------------------------------------------------------------------------|------------------------------------------------------------------------------------------------------------------------------------------------------------------------------------------------------------------------------------------------------------|
| Was the pregnancy planned or unplanned?                                                                      | <input type="radio"/> Planned <input type="radio"/> Unplanned <input type="radio"/> Unknown                                                                                                                                                                |
| At what gestation did the mother realise she was pregnant?                                                   | Weeks<br><input type="radio"/> Unknown                                                                                                                                                                                                                     |
| Did the birth mother drink alcohol before the pregnancy was confirmed?                                       | <input type="radio"/> No <input type="radio"/> Yes <input type="radio"/> Unknown                                                                                                                                                                           |
| Did the birth mother modify her drinking behaviour on confirmation of pregnancy?                             | <input type="radio"/> Yes <input type="radio"/> No <input type="radio"/> Unknown                                                                                                                                                                           |
| During which trimesters was alcohol consumed, tick all that apply                                            | <input type="radio"/> None<br><input type="radio"/> 1st<br><input type="radio"/> 2nd<br><input type="radio"/> 3rd<br><input type="radio"/> Unknown                                                                                                         |
| 1. How often did the birth mother have a drink containing alcohol during this pregnancy?                     | <input type="radio"/> Unknown<br><input type="radio"/> Never (skip Qn 2 & 3)<br><input type="radio"/> monthly or less<br><input type="radio"/> 2-4 times a month<br><input type="radio"/> 2-3 times a week<br><input type="radio"/> 4 or more times a week |
| 2. How many standard drinks did the birth mother have on a typical day when she was drinking this pregnancy? | <input type="radio"/> Unknown<br><input type="radio"/> 1 or 2<br><input type="radio"/> 3 or 4<br><input type="radio"/> 5 or 6<br><input type="radio"/> 7 to 9<br><input type="radio"/> 10 or more                                                          |
| 3. How often did the birth mother have 5 or more standard drinks on one occasion during this pregnancy?      | <input type="radio"/> Unknown<br><input type="radio"/> Never<br><input type="radio"/> Less than monthly<br><input type="radio"/> Monthly<br><input type="radio"/> Weekly<br><input type="radio"/> Daily or almost daily                                    |

\* Note this is not completed if biological caregiver is not involved and information is not recorded in the infant's medical record.

## S2: LEAP- CP (Learning through Everyday Activities with Parents) – 12-Month Medical Assessment- Differential Diagnosis

Study ID: □□□

Date: □□/□□/□□□□

Completed by:

|                             |                 |
|-----------------------------|-----------------|
| Child's name                |                 |
| Corrected Age at assessment |                 |
| Weight                      | kg / percentile |
| Height                      | cm / percentile |
| Head Circumference          | cm / percentile |

|                                                                  |                                                  |               |                       |
|------------------------------------------------------------------|--------------------------------------------------|---------------|-----------------------|
| <b>Visual impairment</b><br>(without correction, on both eyes)   | Not assessed =0                                  |               | Right (R=), Left (L=) |
|                                                                  | Normal/No visual impairment =1                   |               |                       |
|                                                                  | Squint =2                                        |               |                       |
|                                                                  | Impaired =3                                      |               |                       |
|                                                                  | Severely impaired (blind or no useful vision) =4 |               |                       |
| <b>Hearing impairment</b> (before correction, on the better ear) | Not assessed =0                                  |               |                       |
|                                                                  | Normal =1                                        |               |                       |
|                                                                  | Impaired =2                                      |               |                       |
|                                                                  | Severely impaired (hearing loss > 70 dB) =3      |               |                       |
| <b>General Observation:</b>                                      | No abnormality =0                                | Abnormality=1 |                       |
| Face                                                             | 0                                                | 1             |                       |
| dysmorphism                                                      | 0                                                | 1             |                       |
| general nutritional state                                        | 0                                                | 1             |                       |
| Body proportions                                                 | 0                                                | 1             |                       |
| Muscle bulk                                                      | 0                                                | 1             |                       |
| symmetry                                                         | 0                                                | 1             |                       |
| tongue fasciculation                                             | 0                                                | 1             |                       |
| excessive drooling                                               | 0                                                | 1             |                       |
| other                                                            | 0                                                | 1             |                       |
| <b>Gait:</b>                                                     | Non ambulant = 0                                 |               | <b>Comments:</b>      |
|                                                                  | Age appropriate = 1                              |               |                       |
|                                                                  | Toe walking = 2                                  |               |                       |
|                                                                  | Asymmetrical gait = 3                            |               |                       |

### CEREBRAL PALSY

| Motor type          | Primary                        | Secondary                      |
|---------------------|--------------------------------|--------------------------------|
|                     | Spastic =1                     | Spastic =1                     |
|                     | dyskinetic- dystonic =2        | dyskinetic- dystonic =2        |
|                     | dyskinetic- choreoathetotic =3 | dyskinetic- choreoathetotic =3 |
|                     | Hypotonic =4                   | Hypotonic =4                   |
|                     | Ataxic =5                      | Ataxic =5                      |
| <b>Distribution</b> | Bilateral =1 / unilateral =2   | Bilateral =1 / unilateral =2   |
|                     | No of limbs 1 / 2 / 3 / 4      | No of limbs 1 / 2 / 3 / 4      |

**Neurological Signs:**

|                               |                                                                                                            |                |                                                             |                       |                                                                                                            |                            |                |               |            |
|-------------------------------|------------------------------------------------------------------------------------------------------------|----------------|-------------------------------------------------------------|-----------------------|------------------------------------------------------------------------------------------------------------|----------------------------|----------------|---------------|------------|
| <b>Tone:</b>                  | Left                                                                                                       |                |                                                             |                       | Right                                                                                                      |                            |                |               |            |
| Upper Limbs                   | Not tested = 0                                                                                             | Normal =1      | Hypotonic =2                                                | Hypertonic =3         | Not tested = 0                                                                                             | Normal =1                  | Hypotonic =2   | Hypertonic =3 |            |
| Lower limbs                   | Not tested = 0                                                                                             | Normal =1      | Hypotonic =2                                                | Hypertonic =3         | Not tested = 0                                                                                             | Normal =1                  | Hypotonic =2   | Hypertonic =3 |            |
| <b>Tendon Reflexes:</b>       | Left                                                                                                       |                |                                                             |                       | Right                                                                                                      |                            |                |               |            |
| Upper Limbs                   | Not tested =0<br>Present/Normal =1<br>Absent =2<br>Depressed =3<br>Brisk =4<br>Hyperreflexic/Very Brisk =5 |                |                                                             |                       | Not tested =0<br>Present/Normal =1<br>Absent =2<br>Depressed =3<br>Brisk =4<br>Hyperreflexic/Very Brisk =5 |                            |                |               |            |
| Lower limbs                   | Not tested =0<br>Present/Normal =1<br>Absent =2<br>Depressed =3<br>Brisk =4<br>Hyperreflexic/Very Brisk =5 |                |                                                             |                       | Not tested =0<br>Present/Normal =1<br>Absent =2<br>Depressed =3<br>Brisk =4<br>Hyperreflexic/Very Brisk =5 |                            |                |               |            |
| <b>Clonus:</b>                | Upper Limbs                                                                                                |                | Lower limbs                                                 |                       | Upper Limbs                                                                                                |                            | Lower limbs    |               |            |
|                               | Not tested = 0                                                                                             | Absent =1      | Present =2                                                  | Not tested = 0        | Absent =1                                                                                                  | Present =2                 | Not tested = 0 | Absent =1     | Present =2 |
|                               | Not tested = 0                                                                                             | Absent =1      | Present =2                                                  | Not tested = 0        | Absent =1                                                                                                  | Present =2                 | Not tested = 0 | Absent =1     | Present =2 |
| <b>Plantar reflexes:</b>      |                                                                                                            |                |                                                             |                       |                                                                                                            |                            |                |               |            |
| Not tested = 0                | Normal ↓ =1                                                                                                | No response =2 | Abnormal ↑=3                                                | Not tested = 0        | Normal ↓ =1                                                                                                | No response =2             | Abnormal ↑=3   | Abnormal ↑=3  |            |
| <b>Neurological Status</b>    | Normal = 0                                                                                                 |                |                                                             | Unspecified signs = 1 |                                                                                                            | Abnormal (signs of CP) = 2 |                |               |            |
| <b>Cerebral palsy</b>         | No =0                                                                                                      |                | High risk =1                                                |                       | Definitely =2                                                                                              |                            | Unclear        |               |            |
| Comments:                     |                                                                                                            |                |                                                             |                       |                                                                                                            |                            |                |               |            |
| GMFCS level (0-2 years scale) |                                                                                                            |                | I =1 / II =2 / III =3 / IV= 4 / V= 5                        |                       |                                                                                                            |                            |                |               |            |
| MACs level (1-4 year scale)   |                                                                                                            |                | I =1 / II =2 / III =3 / IV= 4 / V= 5                        |                       |                                                                                                            |                            |                |               |            |
| Upper limb/ Handedness        |                                                                                                            |                | Right predominant =0<br>Left predominant =1<br>Bilateral =2 |                       |                                                                                                            |                            |                |               |            |

**FAS SYMPTOMOLOGY**

**Sentinel Facial Features**

Assess for the 3 sentinel facial features of Fetal Alcohol Spectrum Disorder: short palpebral fissure length (2 SD or more below the mean), smooth philtrum (rank 4 or 5 on the Lip-Philtrum guide), and thin upper lip (rank 4 or 5 on the Lip-Philtrum guide).

**Palpebral Fissure Length (PFL)**

|                                                                                                                              | Right PFL |              | Left PFL |         | Mean PFL |          |
|------------------------------------------------------------------------------------------------------------------------------|-----------|--------------|----------|---------|----------|----------|
| Assessment method                                                                                                            | mm        | Z score (SD) | mm       | Z score | mm       | Z score* |
| <input type="checkbox"/> direct measure <input type="checkbox"/> photo analysis                                              |           |              |          |         |          |          |
| <input type="checkbox"/> direct measure <input type="checkbox"/> photo analysis                                              |           |              |          |         |          |          |
| PFL reference chart used: <input type="checkbox"/> Stromland <input type="checkbox"/> Clarren <input type="checkbox"/> Other |           |              |          |         |          |          |

**Philtrum**

| Assessment method                                                               | UW Lip-Philtrum Guide 5-point rank |
|---------------------------------------------------------------------------------|------------------------------------|
| <input type="checkbox"/> direct measure <input type="checkbox"/> photo analysis |                                    |
| <input type="checkbox"/> direct measure <input type="checkbox"/> photo analysis |                                    |
| <input type="checkbox"/> direct measure <input type="checkbox"/> photo analysis |                                    |

**Upper lip**

| Assessment method                                                               | UW Lip-Philtrum Guide 5-point rank |
|---------------------------------------------------------------------------------|------------------------------------|
| <input type="checkbox"/> direct measure <input type="checkbox"/> photo analysis |                                    |
| <input type="checkbox"/> direct measure <input type="checkbox"/> photo analysis |                                    |
| <input type="checkbox"/> direct measure <input type="checkbox"/> photo analysis |                                    |

|                                                                                                                                      |
|--------------------------------------------------------------------------------------------------------------------------------------|
| Lip-Philtrum Guide <sup>†</sup> used: <input type="checkbox"/> Guide 1. Caucasian <input type="checkbox"/> Guide 2. African American |
|--------------------------------------------------------------------------------------------------------------------------------------|

**Sentinel Facial Features Summary**

|                                                                                                                    |
|--------------------------------------------------------------------------------------------------------------------|
| Number of Sentinel Facial Features (PFL 2 SD or more below the mean, philtrum rank 4 or 5, upper lip rank 4 or 5): |
| <input type="checkbox"/> 0 <input type="checkbox"/> 1 <input type="checkbox"/> 2 <input type="checkbox"/> 3        |

**Functional Neurodevelopmental Domain Summaries**

Assess evidence of significant CNS dysfunction due to underlying brain damage. Required evidence includes severe neurodevelopmental impairment (2 SD or more below the mean or < the 3<sup>rd</sup> percentile) in domains of brain function based on standardised psychometric assessment by a qualified professional.

**1. Neurological**

| Test/subtest name                                                                                                                                          | Age/ Date | Score | %ile/SD | Interpretation |
|------------------------------------------------------------------------------------------------------------------------------------------------------------|-----------|-------|---------|----------------|
|                                                                                                                                                            |           |       |         |                |
|                                                                                                                                                            |           |       |         |                |
|                                                                                                                                                            |           |       |         |                |
|                                                                                                                                                            |           |       |         |                |
|                                                                                                                                                            |           |       |         |                |
|                                                                                                                                                            |           |       |         |                |
|                                                                                                                                                            |           |       |         |                |
|                                                                                                                                                            |           |       |         |                |
|                                                                                                                                                            |           |       |         |                |
| Other information:                                                                                                                                         |           |       |         |                |
| Motor Skills impairment: <input type="checkbox"/> None <input type="checkbox"/> Some <input type="checkbox"/> Severe <input type="checkbox"/> Not assessed |           |       |         |                |

## 2. Motor skills

| Test/subtest name                                                                                                                                          | Age/ Date | Score | %ile/SD | Interpretation |
|------------------------------------------------------------------------------------------------------------------------------------------------------------|-----------|-------|---------|----------------|
|                                                                                                                                                            |           |       |         |                |
|                                                                                                                                                            |           |       |         |                |
|                                                                                                                                                            |           |       |         |                |
|                                                                                                                                                            |           |       |         |                |
|                                                                                                                                                            |           |       |         |                |
|                                                                                                                                                            |           |       |         |                |
|                                                                                                                                                            |           |       |         |                |
|                                                                                                                                                            |           |       |         |                |
|                                                                                                                                                            |           |       |         |                |
| Other information:                                                                                                                                         |           |       |         |                |
| Motor Skills impairment: <input type="checkbox"/> None <input type="checkbox"/> Some <input type="checkbox"/> Severe <input type="checkbox"/> Not assessed |           |       |         |                |

## 3. Cognition

| Test/subtest name                                                                                                                                       | Age/ Date | Score | %ile/SD | Interpretation |
|---------------------------------------------------------------------------------------------------------------------------------------------------------|-----------|-------|---------|----------------|
|                                                                                                                                                         |           |       |         |                |
|                                                                                                                                                         |           |       |         |                |
|                                                                                                                                                         |           |       |         |                |
|                                                                                                                                                         |           |       |         |                |
|                                                                                                                                                         |           |       |         |                |
|                                                                                                                                                         |           |       |         |                |
|                                                                                                                                                         |           |       |         |                |
|                                                                                                                                                         |           |       |         |                |
|                                                                                                                                                         |           |       |         |                |
| Other information:                                                                                                                                      |           |       |         |                |
| Cognition impairment: <input type="checkbox"/> None <input type="checkbox"/> Some <input type="checkbox"/> Severe <input type="checkbox"/> Not assessed |           |       |         |                |

## 4. Language (Expressive and Receptive)





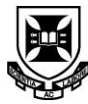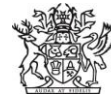

## ASD SYMPTOMOLOGY

| Item                                      | Score                      |                            |                            |                            |                            |
|-------------------------------------------|----------------------------|----------------------------|----------------------------|----------------------------|----------------------------|
| Visual Tracking                           | <input type="checkbox"/> 0 | <input type="checkbox"/> 1 | <input type="checkbox"/> 2 | <input type="checkbox"/> 3 | <input type="checkbox"/> 8 |
| Disengagement of attentions               | <input type="checkbox"/> 0 | <input type="checkbox"/> 1 | <input type="checkbox"/> 2 | <input type="checkbox"/> 3 | <input type="checkbox"/> 8 |
| Orientation to name                       | <input type="checkbox"/> 0 | <input type="checkbox"/> 1 | <input type="checkbox"/> 2 | <input type="checkbox"/> 3 | <input type="checkbox"/> 8 |
| Differential response to facial emotion   | <input type="checkbox"/> 0 | <input type="checkbox"/> 1 | <input type="checkbox"/> 2 | <input type="checkbox"/> 3 | <input type="checkbox"/> 8 |
| Anticipatory social response              | <input type="checkbox"/> 0 | <input type="checkbox"/> 1 | <input type="checkbox"/> 2 | <input type="checkbox"/> 3 | <input type="checkbox"/> 8 |
| Imitation                                 | <input type="checkbox"/> 0 | <input type="checkbox"/> 1 | <input type="checkbox"/> 2 | <input type="checkbox"/> 3 | <input type="checkbox"/> 8 |
| Social Babbling                           | <input type="checkbox"/> 0 | <input type="checkbox"/> 1 | <input type="checkbox"/> 2 | <input type="checkbox"/> 3 | <input type="checkbox"/> 8 |
| Eye Contact                               | <input type="checkbox"/> 0 | <input type="checkbox"/> 1 | <input type="checkbox"/> 2 | <input type="checkbox"/> 3 | <input type="checkbox"/> 8 |
| Reciprocal social smile                   | <input type="checkbox"/> 0 | <input type="checkbox"/> 1 | <input type="checkbox"/> 2 | <input type="checkbox"/> 3 | <input type="checkbox"/> 8 |
| Coordination of eye gaze                  | <input type="checkbox"/> 0 | <input type="checkbox"/> 1 | <input type="checkbox"/> 2 | <input type="checkbox"/> 3 | <input type="checkbox"/> 8 |
| Behavioural Reactivity                    | <input type="checkbox"/> 0 | <input type="checkbox"/> 1 | <input type="checkbox"/> 2 | <input type="checkbox"/> 3 | <input type="checkbox"/> 8 |
| Social interest and shared affect         | <input type="checkbox"/> 0 | <input type="checkbox"/> 1 | <input type="checkbox"/> 2 | <input type="checkbox"/> 3 | <input type="checkbox"/> 8 |
| Transitions                               | <input type="checkbox"/> 0 | <input type="checkbox"/> 1 | <input type="checkbox"/> 2 | <input type="checkbox"/> 3 | <input type="checkbox"/> 8 |
| Motor control                             | <input type="checkbox"/> 0 | <input type="checkbox"/> 1 | <input type="checkbox"/> 2 | <input type="checkbox"/> 3 | <input type="checkbox"/> 8 |
| Atypical motor behaviour                  | <input type="checkbox"/> 0 | <input type="checkbox"/> 1 | <input type="checkbox"/> 2 | <input type="checkbox"/> 3 | <input type="checkbox"/> 8 |
| Engagement of attention                   | <input type="checkbox"/> 0 | <input type="checkbox"/> 1 | <input type="checkbox"/> 2 | <input type="checkbox"/> 3 | <input type="checkbox"/> 8 |
| Insistence on specific objects/activities | <input type="checkbox"/> 0 | <input type="checkbox"/> 1 | <input type="checkbox"/> 2 | <input type="checkbox"/> 3 | <input type="checkbox"/> 8 |
| Sharing Interest                          | <input type="checkbox"/> 0 | <input type="checkbox"/> 1 | <input type="checkbox"/> 2 | <input type="checkbox"/> 3 | <input type="checkbox"/> 8 |
| <b>Total score</b>                        |                            |                            |                            |                            |                            |

| ASD | No =0 | High risk of ASD =1 | Definitely =2 | Unclear |
|-----|-------|---------------------|---------------|---------|
|     |       |                     |               |         |

## 12-Month Medical Assessment- Blinded Differential Diagnosis

Study ID: □□□

Date: □□/□□/□□□□

Completed by:

|                                  |                                        |              |                                |         |
|----------------------------------|----------------------------------------|--------------|--------------------------------|---------|
| <b>Cerebral palsy</b>            | No =0                                  | High risk =1 | Definitely =2                  | Unclear |
| <b>Motor type</b>                | <b>Primary</b>                         |              | <b>Secondary</b>               |         |
|                                  | Spastic =1                             |              | Spastic =1                     |         |
|                                  | dyskinetic- dystonic =2                |              | dyskinetic- dystonic =2        |         |
|                                  | dyskinetic- choreoathetotic =3         |              | dyskinetic- choreoathetotic =3 |         |
|                                  | Hypotonic =4                           |              | Hypotonic =4                   |         |
|                                  | Ataxic =5                              |              | Ataxic =5                      |         |
| <b>Distribution</b>              | Bilateral =1 / unilateral =2           |              | Bilateral =1 / unilateral =2   |         |
|                                  | No of limbs 1 / 2 / 3 / 4              |              | No of limbs 1 / 2 / 3 / 4      |         |
| GMFCS level<br>(0-2 years scale) | I =1 / II =2 / III =3 / IV = 4 / V = 5 |              |                                |         |
| MACs level<br>(1-4 year scale)   | I =1 / II =2 / III =3 / IV = 4 / V = 5 |              |                                |         |
| Comments                         |                                        |              |                                |         |

|                 |       |                     |               |         |
|-----------------|-------|---------------------|---------------|---------|
| <b>FAS</b>      | No =0 | High risk of FAS =1 | Definitely =2 | Unclear |
| <b>Comments</b> |       |                     |               |         |

|                 |       |                     |               |         |
|-----------------|-------|---------------------|---------------|---------|
| <b>ASD</b>      | No =0 | High risk of ASD =1 | Definitely =2 | Unclear |
| <b>Comments</b> |       |                     |               |         |

# S3: LEAP – CP Medical and Allied Health Resource Form

Study ID: □□□

Date: □□/□□/□□□□

Form completed by:

Interviewer initials: □□

## Allied Health

During the last 6 months have you received treatment or advice from:

|                         |                                                                                                                                                                                                    |
|-------------------------|----------------------------------------------------------------------------------------------------------------------------------------------------------------------------------------------------|
| <b>1. Physiotherapy</b> | <input type="radio"/> Yes <input type="radio"/> No                                                                                                                                                 |
| Does it emphasise       | <input type="radio"/> Motor learning <input type="radio"/> Equipment <input type="radio"/> Functional therapy <input type="radio"/> Stretching & positioning<br><input type="radio"/> Other: _____ |
| How often               | <input type="checkbox"/> <input type="checkbox"/> Visits per 6 months                                                                                                                              |
| Format                  | <input type="radio"/> Individual <input type="radio"/> Group <input type="radio"/> Home program                                                                                                    |
| Location                | <input type="radio"/> Hospital <input type="radio"/> Community <input type="radio"/> Home <input type="radio"/> Private practice                                                                   |

|                                |                                                                                                                                                                                                    |
|--------------------------------|----------------------------------------------------------------------------------------------------------------------------------------------------------------------------------------------------|
| <b>2. Occupational therapy</b> | <input type="radio"/> Yes <input type="radio"/> No                                                                                                                                                 |
| Does it emphasise              | <input type="radio"/> Motor learning <input type="radio"/> Equipment <input type="radio"/> Functional therapy <input type="radio"/> Stretching & positioning<br><input type="radio"/> Other: _____ |
| How often                      | <input type="checkbox"/> <input type="checkbox"/> Visits per 6 months                                                                                                                              |
| Format                         | <input type="radio"/> Individual <input type="radio"/> Group <input type="radio"/> Home program                                                                                                    |
| Location                       | <input type="radio"/> Hospital <input type="radio"/> Community <input type="radio"/> Home <input type="radio"/> Private practice                                                                   |

|                          |                                                                                                                                                                                                       |
|--------------------------|-------------------------------------------------------------------------------------------------------------------------------------------------------------------------------------------------------|
| <b>3. Speech therapy</b> | <input type="radio"/> Yes <input type="radio"/> No                                                                                                                                                    |
| Does it emphasise        | <input type="radio"/> Speech/ talking <input type="radio"/> Early communication skills (play) <input type="radio"/> Sign/ symbol <input type="radio"/> Mealtime<br><input type="radio"/> Other: _____ |
| How often                | <input type="checkbox"/> <input type="checkbox"/> Visits per 6 months                                                                                                                                 |
| Format                   | <input type="radio"/> Individual <input type="radio"/> Group <input type="radio"/> Home program                                                                                                       |
| Location                 | <input type="radio"/> Hospital <input type="radio"/> Community <input type="radio"/> Home <input type="radio"/> Private practice                                                                      |

|                         |                                                                                                                                  |
|-------------------------|----------------------------------------------------------------------------------------------------------------------------------|
| <b>4. Other</b>         | <input type="radio"/> Yes <input type="radio"/> No                                                                               |
| What does it emphasise? |                                                                                                                                  |
| How often               | <input type="checkbox"/> <input type="checkbox"/> Visits per 6 months                                                            |
| Format                  | <input type="radio"/> Individual <input type="radio"/> Group <input type="radio"/> Home program                                  |
| Location                | <input type="radio"/> Hospital <input type="radio"/> Community <input type="radio"/> Home <input type="radio"/> Private practice |

## Medical

During the last fortnight, has your child been sick?  Yes  (number of days)  No

During the 6 months, has your child had:

|                                 |                                                                                                               |
|---------------------------------|---------------------------------------------------------------------------------------------------------------|
| <b>1. Admission to hospital</b> | <input type="radio"/> Yes <input type="radio"/> No Number of admissions <input type="checkbox"/>              |
| Visit 1                         | Reason:<br>Treatment/ investigation:<br>Length of stay <input type="checkbox"/> <input type="checkbox"/> days |
| Visit 2                         | Reason:<br>Treatment/ investigation:<br>Length of stay <input type="checkbox"/> <input type="checkbox"/> days |
| Visit 3                         | Reason:<br>Treatment/ investigation:<br>Length of stay <input type="checkbox"/> <input type="checkbox"/> days |
| Visit 4                         | Reason:<br>Treatment/ investigation:<br>Length of stay <input type="checkbox"/> <input type="checkbox"/> days |

|                          |                                                                                                    |
|--------------------------|----------------------------------------------------------------------------------------------------|
| <b>2. GP appointment</b> | <input type="radio"/> Yes <input type="radio"/> No Number of appointments <input type="checkbox"/> |
| Visit 1                  | Reason:<br>Treatment/ investigation:                                                               |
| Visit 2                  | Reason:<br>Treatment/ investigation:                                                               |
| Visit 3                  | Reason:<br>Treatment/ investigation:                                                               |

|                         |                                                                                                    |
|-------------------------|----------------------------------------------------------------------------------------------------|
| Visit 4                 | Reason:<br>Treatment/ investigation:                                                               |
| <b>3. Paediatrician</b> | <input type="radio"/> Yes <input type="radio"/> No Number of appointments <input type="checkbox"/> |
| Visit 1                 | Reason:<br>Treatment/ investigation:                                                               |
| Visit 2                 | Reason:<br>Treatment/ investigation:                                                               |
| Visit 3                 | Reason:<br>Treatment/ investigation:                                                               |
| Visit 4                 | Reason:<br>Treatment/ investigation:                                                               |

|                            |                                                                                                    |
|----------------------------|----------------------------------------------------------------------------------------------------|
| <b>4. Other specialist</b> | <input type="radio"/> Yes <input type="radio"/> No Number of appointments <input type="checkbox"/> |
| Who:                       |                                                                                                    |
| Visit 1                    | Reason:<br>Treatment/ investigation:                                                               |
| Visit 2                    | Reason:<br>Treatment/ investigation:                                                               |
| Visit 3                    | Reason:<br>Treatment/ investigation:                                                               |
| Visit 4                    | Reason:<br>Treatment/ investigation:                                                               |

|                            |                                                                                                    |
|----------------------------|----------------------------------------------------------------------------------------------------|
| <b>5. Other specialist</b> | <input type="radio"/> Yes <input type="radio"/> No Number of appointments <input type="checkbox"/> |
| Who:                       |                                                                                                    |
| Visit 1                    | Reason:<br>Treatment/ investigation:                                                               |
| Visit 2                    | Reason:<br>Treatment/ investigation:                                                               |
| Visit 3                    | Reason:<br>Treatment/ investigation:                                                               |
| Visit 4                    | Reason:<br>Treatment/ investigation:                                                               |

|                            |                                                                                                    |
|----------------------------|----------------------------------------------------------------------------------------------------|
| <b>6. Other specialist</b> | <input type="radio"/> Yes <input type="radio"/> No Number of appointments <input type="checkbox"/> |
| Who:                       |                                                                                                    |
| Visit 1                    | Reason:<br>Treatment/ investigation:                                                               |
| Visit 2                    | Reason:<br>Treatment/ investigation:                                                               |
| Visit 3                    | Reason:<br>Treatment/ investigation:                                                               |
| Visit 4                    | Reason:<br>Treatment/ investigation:                                                               |

**Equipment**

Has your child been provided with any equipment:

- Supportive chair/ seating
- Walking aids
- standing frame
- Splints / orthoses
- Wheelchair

**National Disability Insurance Scheme (NDIS) Funding**

|                                            |                                                                                                                                                                            |
|--------------------------------------------|----------------------------------------------------------------------------------------------------------------------------------------------------------------------------|
| Does your child have an NDIS plan?         | <input type="radio"/> Yes <input type="radio"/> No                                                                                                                         |
| Is the plan self managed?                  | <input type="radio"/> Yes <input type="radio"/> No                                                                                                                         |
| What are you able to use your funding for? | <input type="radio"/> Therapy (eg physiotherapy, OT)<br><input type="radio"/> Equipment (eg walking aid/ orthoses)<br><input type="radio"/> Consumables (eg feeding tubes) |

**STROBE 2007 (v4) Statement—Checklist of items that should be included in reports of cohort studies**

| Section/Topic                | Item # | Recommendation                                                                                                                                                                       | Reported on page # |
|------------------------------|--------|--------------------------------------------------------------------------------------------------------------------------------------------------------------------------------------|--------------------|
| <b>Title and abstract</b>    | 1      | (a) Indicate the study’s design with a commonly used term in the title or the abstract                                                                                               | 1 and 2            |
|                              |        | (b) Provide in the abstract an informative and balanced summary of what was done and what was found                                                                                  | 2                  |
| <b>Introduction</b>          |        |                                                                                                                                                                                      |                    |
| Background/rationale         | 2      | Explain the scientific background and rationale for the investigation being reported                                                                                                 | 3-7                |
| Objectives                   | 3      | State specific objectives, including any prespecified hypotheses                                                                                                                     | 7-9                |
| <b>Methods</b>               |        |                                                                                                                                                                                      |                    |
| Study design                 | 4      | Present key elements of study design early in the paper                                                                                                                              | 9                  |
| Setting                      | 5      | Describe the setting, locations, and relevant dates, including periods of recruitment, exposure, follow-up, and data collection                                                      | 9-13               |
| Participants                 | 6      | (a) Give the eligibility criteria, and the sources and methods of selection of participants. Describe methods of follow-up                                                           | 10-13              |
|                              |        | (b) For matched studies, give matching criteria and number of exposed and unexposed                                                                                                  | N/A                |
| Variables                    | 7      | Clearly define all outcomes, exposures, predictors, potential confounders, and effect modifiers. Give diagnostic criteria, if applicable                                             | 10, 13-20,         |
| Data sources/<br>measurement | 8*     | For each variable of interest, give sources of data and details of methods of assessment (measurement). Describe comparability of assessment methods if there is more than one group | 13-20              |
| Bias                         | 9      | Describe any efforts to address potential sources of bias                                                                                                                            | 21                 |
| Study size                   | 10     | Explain how the study size was arrived at                                                                                                                                            | 10-11              |
| Quantitative variables       | 11     | Explain how quantitative variables were handled in the analyses. If applicable, describe which groupings were chosen and why                                                         | N/A                |
| Statistical methods          | 12     | (a) Describe all statistical methods, including those used to control for confounding                                                                                                | 20                 |
|                              |        | (b) Describe any methods used to examine subgroups and interactions                                                                                                                  | N/A                |
|                              |        | (c) Explain how missing data were addressed                                                                                                                                          | N/A                |
|                              |        | (d) If applicable, explain how loss to follow-up was addressed                                                                                                                       | N/A                |
|                              |        | (e) Describe any sensitivity analyses                                                                                                                                                | N/A                |
| <b>Results</b>               |        |                                                                                                                                                                                      | N/A                |

|                          |     |                                                                                                                                                                                                              |     |
|--------------------------|-----|--------------------------------------------------------------------------------------------------------------------------------------------------------------------------------------------------------------|-----|
| Participants             | 13* | (a) Report numbers of individuals at each stage of study—eg numbers potentially eligible, examined for eligibility, confirmed eligible, included in the study, completing follow-up, and analysed            | N/A |
|                          |     | (b) Give reasons for non-participation at each stage                                                                                                                                                         | N/A |
|                          |     | (c) Consider use of a flow diagram                                                                                                                                                                           | N/A |
| Descriptive data         | 14* | (a) Give characteristics of study participants (eg demographic, clinical, social) and information on exposures and potential confounders                                                                     | N/A |
|                          |     | (b) Indicate number of participants with missing data for each variable of interest                                                                                                                          | N/A |
|                          |     | (c) Summarise follow-up time (eg, average and total amount)                                                                                                                                                  | N/A |
| Outcome data             | 15* | Report numbers of outcome events or summary measures over time                                                                                                                                               | N/A |
| Main results             | 16  | (a) Give unadjusted estimates and, if applicable, confounder-adjusted estimates and their precision (eg, 95% confidence interval). Make clear which confounders were adjusted for and why they were included | N/A |
|                          |     | (b) Report category boundaries when continuous variables were categorized                                                                                                                                    | N/A |
|                          |     | (c) If relevant, consider translating estimates of relative risk into absolute risk for a meaningful time period                                                                                             | N/A |
| Other analyses           | 17  | Report other analyses done—eg analyses of subgroups and interactions, and sensitivity analyses                                                                                                               | N/A |
| <b>Discussion</b>        |     |                                                                                                                                                                                                              |     |
| Key results              | 18  | Summarise key results with reference to study objectives                                                                                                                                                     | N/A |
| <b>Limitations</b>       |     |                                                                                                                                                                                                              |     |
| Interpretation           | 20  | Give a cautious overall interpretation of results considering objectives, limitations, multiplicity of analyses, results from similar studies, and other relevant evidence                                   | N/A |
| Generalisability         | 21  | Discuss the generalisability (external validity) of the study results                                                                                                                                        | N/A |
| <b>Other information</b> |     |                                                                                                                                                                                                              |     |
| Funding                  | 22  | Give the source of funding and the role of the funders for the present study and, if applicable, for the original study on which the present article is based                                                | 24  |

\*Give information separately for cases and controls in case-control studies and, if applicable, for exposed and unexposed groups in cohort and cross-sectional studies.

**Note:** An Explanation and Elaboration article discusses each checklist item and gives methodological background and published examples of transparent reporting. The STROBE checklist is best used in conjunction with this article (freely available on the Web sites of PLoS Medicine at <http://www.plosmedicine.org/>, Annals of Internal Medicine at <http://www.annals.org/>, and Epidemiology at <http://www.epidem.com/>). Information on the STROBE Initiative is available at [www.strobe-statement.org](http://www.strobe-statement.org).
