# Supplementary material for: Early detection of Australian Aboriginal and Torres Strait Islander infants at high risk of adverse neurodevelopmental outcomes at 12 months corrected age: LEAP-CP prospective cohort study protocol
Source: PubMed Central journal article supplement — BMJ Open. 2022 Jan 7;12(1):e053646. doi: 10.1136/bmjopen-2021-053646 (PMC8744123; doi:10.1136/bmjopen-2021-053646), 2022-01-07
Supplement: bmjopen-2021-053646supp001.pdf [file bmjopen-2021-053646supp001.pdf]

## Supplementary Information

### S1: LEAP-CP Medical checklist: Part 1 and 2

Study ID: Date: /

Form completed by:

Interviewer initials: 

#### Part 1: Perinatal data and Birth History – collected from Medical record

##### Infant details

|                                       |                                                                                                                                                                                                                                                |
|---------------------------------------|------------------------------------------------------------------------------------------------------------------------------------------------------------------------------------------------------------------------------------------------|
| Estimated date of delivery            |                                                                                                                                                                                                                                                |
| Date of birth                         |                                                                                                                                                                                                                                                |
| Gestational age at birth (weeks.days) |                                                                                                                                                                                                                                                |
| Maternal age at birth                 |                                                                                                                                                                                                                                                |
| Gender                                | <input type="radio"/> Male<br><input type="radio"/> Female<br><input type="radio"/> Indeterminate                                                                                                                                              |
| Multiple Births                       | <input type="radio"/> Singleton<br><input type="radio"/> Twin<br><input type="radio"/> Triplet<br><input type="radio"/> Surviving twin from multiple (eg singleton birth from triplet pregnancy, sibling died in utero or at birth)            |
| Order of birth for multiples          |                                                                                                                                                                                                                                                |
| Birthweight (grams)                   |                                                                                                                                                                                                                                                |
| Apgar at 1 minute                     |                                                                                                                                                                                                                                                |
| Apgar at 5 minutes                    |                                                                                                                                                                                                                                                |
| Resuscitation                         | <input type="radio"/> Nil (includes suction & O2 therapy)<br><input type="radio"/> Minor (bag and mask, CPAP or Hi-flow)<br><input type="radio"/> Major (intubation, CPR, adrenaline)<br><input type="radio"/> Resuscitation data not recorded |

##### Infant complications

|                                                                                       |                                                                                                                                                                                                                                |
|---------------------------------------------------------------------------------------|--------------------------------------------------------------------------------------------------------------------------------------------------------------------------------------------------------------------------------|
| Respiratory (tick all that apply)                                                     | <input type="radio"/> No (includes suppl O2 for <4 hrs)<br><input type="radio"/> Requiring ongoing ventilation or CPAP<br><input type="radio"/> Pneumothorax<br><input type="radio"/> Pneumonia<br><input type="radio"/> Other |
| Other respiratory issue please specify                                                |                                                                                                                                                                                                                                |
| Chronic lung disease<br>(O2 and or ventilatory requirement at 36 weeks corrected age) | <input type="radio"/> Yes<br><input type="radio"/> No                                                                                                                                                                          |
| Hypoxic Ischemic Encephalopathy (HIE)                                                 | <input type="radio"/> Yes<br><input type="radio"/> No                                                                                                                                                                          |
| Sarnat stage or severity of HIE                                                       | <input type="radio"/> Stage 1 (mild)<br><input type="radio"/> Stage 2 (moderate)<br><input type="radio"/> Stage 3 (severe)                                                                                                     |
| Received cooling                                                                      | <input type="radio"/> Yes<br><input type="radio"/> No                                                                                                                                                                          |
| Patent ductus arteriosus (PDA)                                                        | <input type="radio"/> No<br><input type="radio"/> Yes<br><input type="radio"/> Not documented                                                                                                                                  |
| If yes to PDA, tick all that apply                                                    | <input type="radio"/> No treatment<br><input type="radio"/> Diuretics<br><input type="radio"/> Fluid restriction<br><input type="radio"/> Indomethacin/ibuprofen/paracetamol                                                   |

|                                                            |                                                                                                                                                                                                                                                                                 |
|------------------------------------------------------------|---------------------------------------------------------------------------------------------------------------------------------------------------------------------------------------------------------------------------------------------------------------------------------|
|                                                            | <input type="radio"/> Surgery                                                                                                                                                                                                                                                   |
| NEC                                                        | <input type="radio"/> No<br><input type="radio"/> Suspected (clinical signs, Xrays normal, nil by mouth &/antibiotics <5 days)<br><input type="radio"/> Definite (Xray changes, $\geq$ 5 days nil by mouth &/or triple antibiotics &/or surgery)                                |
| Seizures                                                   | <input type="radio"/> Yes<br><input type="radio"/> No                                                                                                                                                                                                                           |
| Aetiology if known                                         |                                                                                                                                                                                                                                                                                 |
| Surgery                                                    | <input type="radio"/> Yes<br><input type="radio"/> No                                                                                                                                                                                                                           |
| Please specify what surgery (tick all that apply)          | <input type="radio"/> Bowel resection<br><input type="radio"/> Inguinal hernia repair<br><input type="radio"/> Tracheostomy<br><input type="radio"/> PDA ligation<br><input type="radio"/> Rickham's reservoir<br><input type="radio"/> VP shunt<br><input type="radio"/> other |
| Other surgery, please specify                              |                                                                                                                                                                                                                                                                                 |
| Jaundice requiring exchange transfusion                    | <input type="radio"/> Yes<br><input type="radio"/> No                                                                                                                                                                                                                           |
| Major malformation or genetic syndrome                     | <input type="radio"/> Yes<br><input type="radio"/> No                                                                                                                                                                                                                           |
| Please specify                                             |                                                                                                                                                                                                                                                                                 |
| Retinopathy of Prematurity (ROP)                           | <input type="radio"/> No<br><input type="radio"/> Yes, no intervention required<br><input type="radio"/> Yes, received laser therapy<br><input type="radio"/> Yes, received Avastin (brand name for Bevacizumab)<br><input type="radio"/> Not examined                          |
| Left eye: Max stage of ROP as recorded by ophthalmologist  |                                                                                                                                                                                                                                                                                 |
| Right eye: Max stage of ROP as recorded by ophthalmologist |                                                                                                                                                                                                                                                                                 |
| Hearing Screen result                                      | <input type="radio"/> Pass<br><input type="radio"/> Referred for further examination<br><input type="radio"/> Not examined                                                                                                                                                      |
| Referred hearing result                                    |                                                                                                                                                                                                                                                                                 |

**Cranial and MRI findings Ultrasound findings (most severe reported)**

|                                                         |                                                       |
|---------------------------------------------------------|-------------------------------------------------------|
| IVH                                                     | <input type="radio"/> Yes<br><input type="radio"/> No |
| Maximum IVH grade Left                                  |                                                       |
| Maximum IVH grade Right                                 |                                                       |
| Cystic PVL                                              | <input type="radio"/> Yes<br><input type="radio"/> No |
| Please specify any other abnormal neuroimaging findings |                                                       |
| Age at time of CUS/MRI                                  |                                                       |
| Where was the CUS/MRI completed                         |                                                       |

**Discharge details**

|                                                              |                                                       |
|--------------------------------------------------------------|-------------------------------------------------------|
| LOS in hospital (days)                                       |                                                       |
| NICU<br>SCN<br>Transferred to other hospital                 |                                                       |
| Discharged home on Oxygen                                    | <input type="radio"/> Yes<br><input type="radio"/> No |
| Was the infant receiving any tube feeding on discharge home? | <input type="radio"/> Yes<br><input type="radio"/> No |

**Developmental History**

|                                                           |                                                                                                                                                                                                                                                                                                                                         |
|-----------------------------------------------------------|-----------------------------------------------------------------------------------------------------------------------------------------------------------------------------------------------------------------------------------------------------------------------------------------------------------------------------------------|
| Complications since birth<br>(please tick all that apply) | <input type="radio"/> CNS infection (eg meningitis/ encephalitis)<br><input type="radio"/> Head injury<br><input type="radio"/> Near drowning<br><input type="radio"/> Non-accidental injury<br><input type="radio"/> Tumour<br><input type="radio"/> CVA<br><input type="radio"/> Cerebral malformation<br><input type="radio"/> Other |
| Other, please specify                                     |                                                                                                                                                                                                                                                                                                                                         |

**Maternal details**

|                                                                                    |                                                                                                                                                                                                                                                                                                                                                                                                                                                                                                                                                                                                                                                                                           |
|------------------------------------------------------------------------------------|-------------------------------------------------------------------------------------------------------------------------------------------------------------------------------------------------------------------------------------------------------------------------------------------------------------------------------------------------------------------------------------------------------------------------------------------------------------------------------------------------------------------------------------------------------------------------------------------------------------------------------------------------------------------------------------------|
| Maternal age at delivery                                                           |                                                                                                                                                                                                                                                                                                                                                                                                                                                                                                                                                                                                                                                                                           |
| Mode of delivery                                                                   | <input type="radio"/> Vaginal<br><input type="radio"/> Caesarean – in labour<br><input type="radio"/> Caesarean – not in labour<br><input type="radio"/> Not documented                                                                                                                                                                                                                                                                                                                                                                                                                                                                                                                   |
| Specify Caesarean section                                                          | <input type="radio"/> Elective<br><input type="radio"/> Emergency                                                                                                                                                                                                                                                                                                                                                                                                                                                                                                                                                                                                                         |
| Did the infant have foetal growth restriction?                                     | <input type="radio"/> Yes<br><input type="radio"/> No                                                                                                                                                                                                                                                                                                                                                                                                                                                                                                                                                                                                                                     |
| Did the mother have any of the following medical conditions during this pregnancy? | <input type="radio"/> None<br><input type="radio"/> Pre-eclampsia<br><input type="radio"/> Essential hypertension<br><input type="radio"/> Thrombophilia<br><input type="radio"/> Diabetes - specify<br><input type="radio"/> Epilepsy<br><input type="radio"/> Respiratory - specify<br><input type="radio"/> Renal disease - specify<br><input type="radio"/> Cardiac disease - specify<br><input type="radio"/> Pulmonary - specify<br><input type="radio"/> Red cell isoimmunisation<br><input type="radio"/> Autoimmune disease - specify<br><input type="radio"/> Psychiatric (diagnosed) - specify<br><input type="radio"/> Substance use - specify<br><input type="radio"/> Other |
| Diabetes (please specify)                                                          | <input type="radio"/> Gestational<br><input type="radio"/> Type 1 diabetes<br><input type="radio"/> Type 2 diabetes                                                                                                                                                                                                                                                                                                                                                                                                                                                                                                                                                                       |
| Respiratory (please specify)                                                       |                                                                                                                                                                                                                                                                                                                                                                                                                                                                                                                                                                                                                                                                                           |

|                                                                             |                                                                                                                                                                                                                                                                                                                                                                                                                                                       |
|-----------------------------------------------------------------------------|-------------------------------------------------------------------------------------------------------------------------------------------------------------------------------------------------------------------------------------------------------------------------------------------------------------------------------------------------------------------------------------------------------------------------------------------------------|
| Renal disease (please specify)                                              |                                                                                                                                                                                                                                                                                                                                                                                                                                                       |
| Cardiac disease (please specify)                                            |                                                                                                                                                                                                                                                                                                                                                                                                                                                       |
| Pulmonary (please specify)                                                  |                                                                                                                                                                                                                                                                                                                                                                                                                                                       |
| Autoimmune (please specify)                                                 |                                                                                                                                                                                                                                                                                                                                                                                                                                                       |
| Psychiatric (please specify)                                                |                                                                                                                                                                                                                                                                                                                                                                                                                                                       |
| Substance use (please specify)                                              |                                                                                                                                                                                                                                                                                                                                                                                                                                                       |
| Other (please specify)                                                      |                                                                                                                                                                                                                                                                                                                                                                                                                                                       |
| Antepartum haemorrhage (bleeding after 20 weeks gestation)?                 | <input type="radio"/> Yes<br><input type="radio"/> No                                                                                                                                                                                                                                                                                                                                                                                                 |
| If Yes, specify at what gestation                                           |                                                                                                                                                                                                                                                                                                                                                                                                                                                       |
| Did the mother receive corticosteroids (to enhance foetal lung maturation)? | <input type="radio"/> Yes<br><input type="radio"/> No<br><input type="radio"/> Not documented                                                                                                                                                                                                                                                                                                                                                         |
| Antenatal corticosteroids (number of completed courses; 2 doses = 1 course) | <input type="radio"/> None<br><input type="radio"/> Incomplete (1 dose only)<br><input type="radio"/> 1 course<br><input type="radio"/> 2 courses<br><input type="radio"/> 3 courses<br><input type="radio"/> Information not documented                                                                                                                                                                                                              |
| Did the mother receive any intravenous magnesium sulphate                   | <input type="radio"/> No<br><input type="radio"/> Yes<br><input type="radio"/> Not documented                                                                                                                                                                                                                                                                                                                                                         |
| Duration of ruptured membranes                                              | <input type="radio"/> N/A or no data available<br><input type="radio"/> <24 hours<br><input type="radio"/> ≥24 hours                                                                                                                                                                                                                                                                                                                                  |
| Were antibiotics given?                                                     | <input type="radio"/> No<br><input type="radio"/> Yes<br><input type="radio"/> Not documented                                                                                                                                                                                                                                                                                                                                                         |
| Did any of the following intra &/or post-partum complications occur?        | <input type="radio"/> None<br><input type="radio"/> Intra-partum fever (in mother)<br><input type="radio"/> Preterm labour<br><input type="radio"/> Meconium<br><input type="radio"/> Breech<br><input type="radio"/> Shoulder dystocia<br><input type="radio"/> Delayed cry (>5 minutes after birth)<br><input type="radio"/> Lethargy or seizures within 72 hours of birth<br><input type="radio"/> Cord around neck<br><input type="radio"/> Other |
| Other, please specify                                                       |                                                                                                                                                                                                                                                                                                                                                                                                                                                       |
| Antenatal care                                                              | <input type="radio"/> Yes<br><input type="radio"/> No                                                                                                                                                                                                                                                                                                                                                                                                 |
| Number of visits                                                            |                                                                                                                                                                                                                                                                                                                                                                                                                                                       |

**Medications**

During the last 6 months has your child had medications for...

|                                |                                                    |
|--------------------------------|----------------------------------------------------|
| <b>1. Epilepsy</b>             | <input type="radio"/> Yes <input type="radio"/> No |
| A. Which medication            |                                                    |
| Frequency (per day)            | <input type="checkbox"/> <input type="checkbox"/>  |
| Dosage (per day)               | <input type="checkbox"/> <input type="checkbox"/>  |
| Duration (length of treatment) |                                                    |
| Any adverse effects?           | <input type="radio"/> Yes <input type="radio"/> No |
| B. Which medication            |                                                    |
| Frequency (per day)            | <input type="checkbox"/> <input type="checkbox"/>  |
| Dosage (per day)               | <input type="checkbox"/> <input type="checkbox"/>  |
| Duration (length of treatment) |                                                    |
| Any adverse effects?           | <input type="radio"/> Yes <input type="radio"/> No |
| C. Which medication            |                                                    |
| Frequency (per day)            | <input type="checkbox"/> <input type="checkbox"/>  |
| Dosage (per day)               | <input type="checkbox"/> <input type="checkbox"/>  |
| Duration (length of treatment) |                                                    |
| Any adverse effects?           | <input type="radio"/> Yes <input type="radio"/> No |

|                                |                                                    |
|--------------------------------|----------------------------------------------------|
| <b>2. Saliva control</b>       | <input type="radio"/> Yes <input type="radio"/> No |
| A. Which medication            |                                                    |
| Frequency (per day)            | <input type="checkbox"/> <input type="checkbox"/>  |
| Dosage (per day)               | <input type="checkbox"/> <input type="checkbox"/>  |
| Duration (length of treatment) |                                                    |
| Any adverse effects?           | <input type="radio"/> Yes <input type="radio"/> No |
| B. Which medication            |                                                    |
| Frequency (per day)            | <input type="checkbox"/> <input type="checkbox"/>  |
| Dosage (per day)               | <input type="checkbox"/> <input type="checkbox"/>  |
| Duration (length of treatment) |                                                    |
| Any adverse effects?           | <input type="radio"/> Yes <input type="radio"/> No |

|                                |                                                    |
|--------------------------------|----------------------------------------------------|
| <b>3. Other</b>                | <input type="radio"/> Yes <input type="radio"/> No |
| A. Which medication            |                                                    |
| Frequency (per day)            | <input type="checkbox"/> <input type="checkbox"/>  |
| Dosage (per day)               | <input type="checkbox"/> <input type="checkbox"/>  |
| Duration (length of treatment) |                                                    |
| Any adverse effects?           | <input type="radio"/> Yes <input type="radio"/> No |
| B. Which medication            |                                                    |
| Frequency (per day)            | <input type="checkbox"/> <input type="checkbox"/>  |
| Dosage (per day)               | <input type="checkbox"/> <input type="checkbox"/>  |
| Duration (length of treatment) |                                                    |
| Any adverse effects?           | <input type="radio"/> Yes <input type="radio"/> No |

**Co-morbidities**

|          | Parent question (based on 10Q Screen)*                                                                                                                                       | Formal assessment |
|----------|------------------------------------------------------------------------------------------------------------------------------------------------------------------------------|-------------------|
| Physical | Does your child have any serious delay in sitting, standing or walking? <input type="radio"/> Yes <input type="radio"/> No<br><br>Does your child have difficulty walking or |                   |

|                                                               |                                                                                                                                                                                                                                                                                                                                              |                                                                                                                                                                                                                                                                                                                                                                                                                                      |
|---------------------------------------------------------------|----------------------------------------------------------------------------------------------------------------------------------------------------------------------------------------------------------------------------------------------------------------------------------------------------------------------------------------------|--------------------------------------------------------------------------------------------------------------------------------------------------------------------------------------------------------------------------------------------------------------------------------------------------------------------------------------------------------------------------------------------------------------------------------------|
|                                                               | using arms or does he/ she have weakness in the arms/ legs? <input type="radio"/> Yes <input type="radio"/> No                                                                                                                                                                                                                               |                                                                                                                                                                                                                                                                                                                                                                                                                                      |
| Epilepsy/ infantile seizures (date of onset) and seizure type | Does your child sometimes have fits, become rigid, or lose consciousness? <input type="radio"/> Yes <input type="radio"/> No                                                                                                                                                                                                                 | Date of onset (from above):<br>Type of seizure (from above):<br>Defined by 2 unprovoked seizures excluding febrile or neonatal seizures<br><input type="radio"/> Generalised or partial<br><input type="radio"/> Generalised – sudden onset of seizures that compromises responsiveness and affects the whole body<br><input type="radio"/> Partial – seizures have focality therefore symptoms reflect onset in 1 part of the brain |
| Visual impairment                                             | Compared with other children, does your child have difficulty seeing, either in the daytime or at night? <input type="radio"/> Yes <input type="radio"/> No                                                                                                                                                                                  | <input type="radio"/> No<br><input type="radio"/> Diagnosed impaired<br><input type="radio"/> Suspected impaired<br><input type="radio"/> Unsure                                                                                                                                                                                                                                                                                     |
| Hearing impairment                                            | Does your child appear to have difficulty hearing? <input type="radio"/> Yes <input type="radio"/> No                                                                                                                                                                                                                                        | <input type="radio"/> No<br><input type="radio"/> Diagnosed impaired<br><input type="radio"/> Suspected impaired<br><input type="radio"/> Unsure                                                                                                                                                                                                                                                                                     |
| Intellectual impairment                                       | Does your child learn to do things like other children his/ her age? <input type="radio"/> Yes <input type="radio"/> No<br><br>Compared with other children of his/ her age, does your child appear in any way mentally backward, dull or slow? <input type="radio"/> Yes <input type="radio"/> No                                           | <input type="radio"/> No<br><input type="radio"/> Diagnosed impaired<br><input type="radio"/> Suspected impaired<br><input type="radio"/> Unsure                                                                                                                                                                                                                                                                                     |
| Communication impairment                                      | When you tell your child to do something, does he/ she seem to understand what you are saying? <input type="radio"/> Yes <input type="radio"/> No<br><br>Does your child speak at all? <input type="radio"/> Yes <input type="radio"/> No<br><br>Can your child name at least one object? <input type="radio"/> Yes <input type="radio"/> No | <input type="radio"/> No<br><input type="radio"/> Diagnosed impaired<br><input type="radio"/> Suspected impaired<br><input type="radio"/> Unsure                                                                                                                                                                                                                                                                                     |

\*10 Question Screen is a standardised parent-reported measure. Please ask these questions verbatim.

**Part 2: Socio-demographic information****Household Characteristics**

|                                                                                                                                                                             |                                                                                                                                                                                                                                              |                                   |                                   |                                   |                                   |
|-----------------------------------------------------------------------------------------------------------------------------------------------------------------------------|----------------------------------------------------------------------------------------------------------------------------------------------------------------------------------------------------------------------------------------------|-----------------------------------|-----------------------------------|-----------------------------------|-----------------------------------|
| Family pedigree (3 generations)<br><br>* Note this is not completed if biological caregiver is not involved and information is not recorded in the infant's medical record. | Any evidence of illness in the family; any problems with development or intellect; presence of motor disorder, congenital deformity, decreased motor function over time, in-utero/death, disease; cousin marriage, sudden/ unexplained death |                                   |                                   |                                   |                                   |
| Family structure                                                                                                                                                            | 2 caregivers (nuclear)                                                                                                                                                                                                                       | Separated parents dual custody    | Cared for by other intact family  | Single caregiver                  | Other                             |
| Birth order (of blood siblings)                                                                                                                                             | First born                                                                                                                                                                                                                                   | Second born                       | Third born                        | Fourth born                       | Other (specify)                   |
| Child lives with                                                                                                                                                            | Nuclear family                                                                                                                                                                                                                               | Extended family                   | Step family                       | Kinship care                      | Foster care                       |
| Family members in the house (number)                                                                                                                                        |                                                                                                                                                                                                                                              |                                   |                                   | Adult men                         |                                   |
|                                                                                                                                                                             |                                                                                                                                                                                                                                              |                                   |                                   | Adult women                       |                                   |
|                                                                                                                                                                             |                                                                                                                                                                                                                                              |                                   |                                   | Children <18 years                |                                   |
| Other relatives living close by                                                                                                                                             | Yes / no                                                                                                                                                                                                                                     |                                   |                                   |                                   |                                   |
| Who regularly provides care for the child (multiple times per week)? (select as many as apply, and provide their details)<br>Other (specify):                               | <b>Relationship to child:</b>                                                                                                                                                                                                                | <b>Relationship to child:</b>     | <b>Relationship to child:</b>     | <b>Relationship to child:</b>     | <b>Relationship to child:</b>     |
|                                                                                                                                                                             | Age:<br>Highest education:                                                                                                                                                                                                                   | Age:<br>Highest education:        | Age:<br>Highest education:        | Age:<br>Highest education:        | Age:<br>Highest education:        |
|                                                                                                                                                                             | Occupation:<br>Frequency of care:                                                                                                                                                                                                            | Occupation:<br>Frequency of care: | Occupation:<br>Frequency of care: | Occupation:<br>Frequency of care: | Occupation:<br>Frequency of care: |
| Does the infant's biological mother/father identify as                                                                                                                      | Aboriginal                                                                                                                                                                                                                                   | Torres Strait Islander            |                                   |                                   |                                   |
| Primary language(s) spoken at home                                                                                                                                          | English only                                                                                                                                                                                                                                 | Some English                      | No English                        | Specify language(s):              |                                   |
| Where family traditionally from?                                                                                                                                            |                                                                                                                                                                                                                                              |                                   |                                   |                                   |                                   |
| Current postcode                                                                                                                                                            |                                                                                                                                                                                                                                              |                                   |                                   |                                   |                                   |
| Distance to town (corner store)                                                                                                                                             | <input type="checkbox"/> <input type="checkbox"/> <input type="checkbox"/> minutes (in car)                                                                                                                                                  |                                   |                                   |                                   |                                   |

**Employment**

|                                                  |                  |                   |                     |       |                |       |
|--------------------------------------------------|------------------|-------------------|---------------------|-------|----------------|-------|
| Who are the main earners/ workers in the family? | Grandfather      | Grandmother       | Father              | Uncle | Mother         | Other |
| Main earners' occupation/s                       |                  |                   |                     |       |                |       |
| Main earner's employment                         | Fulltime/ secure | Part-time/ casual | Unemployed/ pension |       | Fly in fly out |       |
| Does ill-health often prevent them from working? | Y                |                   | N                   |       | NA             |       |

**Alcohol use in early pregnancy (AUDIT-C)\***

|                                                                                                              |                                                                                                                                                                                                                                                            |
|--------------------------------------------------------------------------------------------------------------|------------------------------------------------------------------------------------------------------------------------------------------------------------------------------------------------------------------------------------------------------------|
| Was the pregnancy planned or unplanned?                                                                      | <input type="radio"/> Planned <input type="radio"/> Unplanned <input type="radio"/> Unknown                                                                                                                                                                |
| At what gestation did the mother realise she was pregnant?                                                   | Weeks<br><input type="radio"/> Unknown                                                                                                                                                                                                                     |
| Did the birth mother drink alcohol before the pregnancy was confirmed?                                       | <input type="radio"/> No <input type="radio"/> Yes <input type="radio"/> Unknown                                                                                                                                                                           |
| Did the birth mother modify her drinking behaviour on confirmation of pregnancy?                             | <input type="radio"/> Yes <input type="radio"/> No <input type="radio"/> Unknown                                                                                                                                                                           |
| During which trimesters was alcohol consumed, tick all that apply                                            | <input type="radio"/> None<br><input type="radio"/> 1st<br><input type="radio"/> 2nd<br><input type="radio"/> 3rd<br><input type="radio"/> Unknown                                                                                                         |
| 1. How often did the birth mother have a drink containing alcohol during this pregnancy?                     | <input type="radio"/> Unknown<br><input type="radio"/> Never (skip Qn 2 & 3)<br><input type="radio"/> monthly or less<br><input type="radio"/> 2-4 times a month<br><input type="radio"/> 2-3 times a week<br><input type="radio"/> 4 or more times a week |
| 2. How many standard drinks did the birth mother have on a typical day when she was drinking this pregnancy? | <input type="radio"/> Unknown<br><input type="radio"/> 1 or 2<br><input type="radio"/> 3 or 4<br><input type="radio"/> 5 or 6<br><input type="radio"/> 7 to 9<br><input type="radio"/> 10 or more                                                          |
| 3. How often did the birth mother have 5 or more standard drinks on one occasion during this pregnancy?      | <input type="radio"/> Unknown<br><input type="radio"/> Never<br><input type="radio"/> Less than monthly<br><input type="radio"/> Monthly<br><input type="radio"/> Weekly<br><input type="radio"/> Daily or almost daily                                    |

\* Note this is not completed if biological caregiver is not involved and information is not recorded in the infant's medical record.



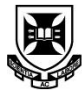

THE UNIVERSITY  
OF QUEENSLAND  
AUSTRALIA

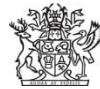

Queensland  
Government

## S2: LEAP- CP (Learning through Everyday Activities with Parents) \_ 12-Month Medical Assessment- Differential Diagnosis

Study ID: □□□

Date: □□/□□/□□□□

Completed by:

|                             |                 |
|-----------------------------|-----------------|
| Child's name                |                 |
| Corrected Age at assessment |                 |
| Weight                      | kg / percentile |
| Height                      | cm / percentile |
| Head Circumference          | cm / percentile |

|                                                                  |                                                  |               |                       |
|------------------------------------------------------------------|--------------------------------------------------|---------------|-----------------------|
| <b>Visual impairment</b><br>(without correction, on both eyes)   | Not assessed =0                                  |               | Right (R=), Left (L=) |
|                                                                  | Normal/No visual impairment =1                   |               |                       |
|                                                                  | Squint =2                                        |               |                       |
|                                                                  | Impaired =3                                      |               |                       |
|                                                                  | Severely impaired (blind or no useful vision) =4 |               |                       |
| <b>Hearing impairment</b> (before correction, on the better ear) | Not assessed =0                                  |               |                       |
|                                                                  | Normal =1                                        |               |                       |
|                                                                  | Impaired =2                                      |               |                       |
|                                                                  | Severely impaired (hearing loss > 70 dB) =3      |               |                       |
| <b>General Observation:</b>                                      | No abnormality =0                                | Abnormality=1 |                       |
| Face                                                             | 0                                                | 1             |                       |
| dysmorphism                                                      | 0                                                | 1             |                       |
| general nutritional state                                        | 0                                                | 1             |                       |
| Body proportions                                                 | 0                                                | 1             |                       |
| Muscle bulk                                                      | 0                                                | 1             |                       |
| symmetry                                                         | 0                                                | 1             |                       |
| tongue fasciculation                                             | 0                                                | 1             |                       |
| excessive drooling                                               | 0                                                | 1             |                       |
| other                                                            | 0                                                | 1             |                       |
| <b>Gait:</b>                                                     | Non ambulant = 0                                 |               | <b>Comments:</b>      |
|                                                                  | Age appropriate = 1                              |               |                       |
|                                                                  | Toe walking = 2                                  |               |                       |
|                                                                  | Asymmetrical gait = 3                            |               |                       |

### CEREBRAL PALSY

| Motor type          | Primary                        | Secondary                      |
|---------------------|--------------------------------|--------------------------------|
|                     | Spastic =1                     | Spastic =1                     |
|                     | dyskinetic- dystonic =2        | dyskinetic- dystonic =2        |
|                     | dyskinetic- choreoathetotic =3 | dyskinetic- choreoathetotic =3 |
|                     | Hypotonic =4                   | Hypotonic =4                   |
|                     | Ataxic =5                      | Ataxic =5                      |
| <b>Distribution</b> | Bilateral =1 / unilateral =2   | Bilateral =1 / unilateral =2   |
|                     | No of limbs 1 / 2 / 3 / 4      | No of limbs 1 / 2 / 3 / 4      |

LEAP-CP 12 Month Medical Assessment Version 1: 22/07/2020 ID □□□

1

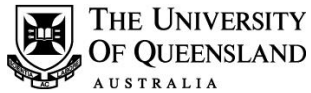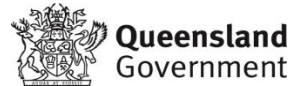**Neurological Signs:**

| <b>Tone:</b>                  |                                                                                                            | Left                                                        |              |                                                                                                            | Right          |                            |              |               |
|-------------------------------|------------------------------------------------------------------------------------------------------------|-------------------------------------------------------------|--------------|------------------------------------------------------------------------------------------------------------|----------------|----------------------------|--------------|---------------|
| Upper Limbs                   | Not tested = 0                                                                                             | Normal =1                                                   | Hypotonic =2 | Hypertonic =3                                                                                              | Not tested = 0 | Normal =1                  | Hypotonic =2 | Hypertonic =3 |
| Lower limbs                   | Not tested = 0                                                                                             | Normal =1                                                   | Hypotonic =2 | Hypertonic =3                                                                                              | Not tested = 0 | Normal =1                  | Hypotonic =2 | Hypertonic =3 |
| <b>Tendon Reflexes:</b>       |                                                                                                            | Left                                                        |              |                                                                                                            | Right          |                            |              |               |
| Upper Limbs                   | Not tested =0<br>Present/Normal =1<br>Absent =2<br>Depressed =3<br>Brisk =4<br>Hyperreflexic/Very Brisk =5 |                                                             |              | Not tested =0<br>Present/Normal =1<br>Absent =2<br>Depressed =3<br>Brisk =4<br>Hyperreflexic/Very Brisk =5 |                |                            |              |               |
| Lower limbs                   | Not tested =0<br>Present/Normal =1<br>Absent =2<br>Depressed =3<br>Brisk =4<br>Hyperreflexic/Very Brisk =5 |                                                             |              | Not tested =0<br>Present/Normal =1<br>Absent =2<br>Depressed =3<br>Brisk =4<br>Hyperreflexic/Very Brisk =5 |                |                            |              |               |
| <b>Clonus:</b>                |                                                                                                            |                                                             |              |                                                                                                            |                |                            |              |               |
| Upper Limbs                   | Not tested = 0                                                                                             | Absent =1                                                   | Present =2   | Not tested = 0                                                                                             | Absent =1      | Present =2                 |              |               |
| Lower limbs                   | Not tested = 0                                                                                             | Absent =1                                                   | Present =2   | Not tested = 0                                                                                             | Absent =1      | Present =2                 |              |               |
| <b>Plantar reflexes:</b>      |                                                                                                            |                                                             |              |                                                                                                            |                |                            |              |               |
| Not tested = 0                | Normal ↓ =1                                                                                                | No response =2                                              | Abnormal ↑=3 | Not tested = 0                                                                                             | Normal ↓ =1    | No response =2             | Abnormal ↑=3 |               |
| <b>Neurological Status</b>    |                                                                                                            | Normal = 0                                                  |              | Unspecified signs = 1                                                                                      |                | Abnormal (signs of CP) = 2 |              |               |
| <b>Cerebral palsy</b>         |                                                                                                            | No =0                                                       |              | High risk =1                                                                                               |                | Definitely =2              |              | Unclear       |
| Comments:                     |                                                                                                            |                                                             |              |                                                                                                            |                |                            |              |               |
| GMFCS level (0-2 years scale) |                                                                                                            | I =1 / II =2 / III =3 / IV = 4 / V = 5                      |              |                                                                                                            |                |                            |              |               |
| MACs level (1-4 year scale)   |                                                                                                            | I =1 / II =2 / III =3 / IV = 4 / V = 5                      |              |                                                                                                            |                |                            |              |               |
| Upper limb/ Handedness        |                                                                                                            | Right predominant =0<br>Left predominant =1<br>Bilateral =2 |              |                                                                                                            |                |                            |              |               |

**FAS SYMPTOMOLOGY**

LEAP-CP 12 Month Medical Assessment Version 1: 22/07/2020 ID □□□

2

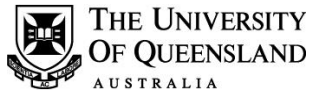

### Sentinel Facial Features

Assess for the 3 sentinel facial features of Fetal Alcohol Spectrum Disorder: short palpebral fissure length (2 SD or more below the mean), smooth philtrum (rank 4 or 5 on the Lip-Philtrum guide), and thin upper lip (rank 4 or 5 on the Lip-Philtrum guide).

#### Palpebral Fissure Length (PFL)

| Assessment method                                                                                                            | Right PFL |              | Left PFL |         | Mean PFL |          |
|------------------------------------------------------------------------------------------------------------------------------|-----------|--------------|----------|---------|----------|----------|
|                                                                                                                              | mm        | Z score (SD) | mm       | Z score | mm       | Z score* |
| <input type="checkbox"/> direct measure <input type="checkbox"/> photo analysis                                              |           |              |          |         |          |          |
| <input type="checkbox"/> direct measure <input type="checkbox"/> photo analysis                                              |           |              |          |         |          |          |
| PFL reference chart used: <input type="checkbox"/> Stromland <input type="checkbox"/> Clarren <input type="checkbox"/> Other |           |              |          |         |          |          |

#### Philtrum

| Assessment method                                                               | UW Lip-Philtrum Guide 5-point rank |
|---------------------------------------------------------------------------------|------------------------------------|
| <input type="checkbox"/> direct measure <input type="checkbox"/> photo analysis |                                    |
| <input type="checkbox"/> direct measure <input type="checkbox"/> photo analysis |                                    |
| <input type="checkbox"/> direct measure <input type="checkbox"/> photo analysis |                                    |

#### Upper lip

| Assessment method                                                               | UW Lip-Philtrum Guide 5-point rank |
|---------------------------------------------------------------------------------|------------------------------------|
| <input type="checkbox"/> direct measure <input type="checkbox"/> photo analysis |                                    |
| <input type="checkbox"/> direct measure <input type="checkbox"/> photo analysis |                                    |
| <input type="checkbox"/> direct measure <input type="checkbox"/> photo analysis |                                    |

|                                                                                                                                      |
|--------------------------------------------------------------------------------------------------------------------------------------|
| Lip-Philtrum Guide <sup>†</sup> used: <input type="checkbox"/> Guide 1. Caucasian <input type="checkbox"/> Guide 2. African American |
|--------------------------------------------------------------------------------------------------------------------------------------|

#### Sentinel Facial Features Summary

|                                                                                                                    |
|--------------------------------------------------------------------------------------------------------------------|
| Number of Sentinel Facial Features (PFL 2 SD or more below the mean, philtrum rank 4 or 5, upper lip rank 4 or 5): |
| <input type="checkbox"/> 0 <input type="checkbox"/> 1 <input type="checkbox"/> 2 <input type="checkbox"/> 3        |

#### Functional Neurodevelopmental Domain Summaries

Assess evidence of significant CNS dysfunction due to underlying brain damage. Required evidence includes severe neurodevelopmental impairment (2 SD or more below the mean or < the 3<sup>rd</sup> percentile) in domains of brain function based on standardised psychometric assessment by a qualified professional.

#### 1. Neurological

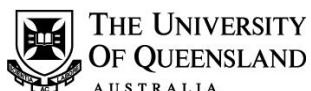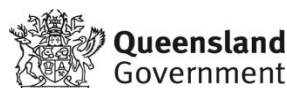

| Test/subtest name                                                                                                                                          | Age/ Date | Score | %ile/SD | Interpretation |
|------------------------------------------------------------------------------------------------------------------------------------------------------------|-----------|-------|---------|----------------|
|                                                                                                                                                            |           |       |         |                |
|                                                                                                                                                            |           |       |         |                |
|                                                                                                                                                            |           |       |         |                |
|                                                                                                                                                            |           |       |         |                |
|                                                                                                                                                            |           |       |         |                |
| Other information:                                                                                                                                         |           |       |         |                |
| Motor Skills impairment: <input type="checkbox"/> None <input type="checkbox"/> Some <input type="checkbox"/> Severe <input type="checkbox"/> Not assessed |           |       |         |                |

## 2. Motor skills

| Test/subtest name                                                                                                                                          | Age/ Date | Score | %ile/SD | Interpretation |
|------------------------------------------------------------------------------------------------------------------------------------------------------------|-----------|-------|---------|----------------|
|                                                                                                                                                            |           |       |         |                |
|                                                                                                                                                            |           |       |         |                |
|                                                                                                                                                            |           |       |         |                |
|                                                                                                                                                            |           |       |         |                |
|                                                                                                                                                            |           |       |         |                |
| Other information:                                                                                                                                         |           |       |         |                |
| Motor Skills impairment: <input type="checkbox"/> None <input type="checkbox"/> Some <input type="checkbox"/> Severe <input type="checkbox"/> Not assessed |           |       |         |                |

## 3. Cognition

| Test/subtest name                                                                                                                                       | Age/ Date | Score | %ile/SD | Interpretation |
|---------------------------------------------------------------------------------------------------------------------------------------------------------|-----------|-------|---------|----------------|
|                                                                                                                                                         |           |       |         |                |
|                                                                                                                                                         |           |       |         |                |
|                                                                                                                                                         |           |       |         |                |
|                                                                                                                                                         |           |       |         |                |
| Other information:                                                                                                                                      |           |       |         |                |
| Cognition impairment: <input type="checkbox"/> None <input type="checkbox"/> Some <input type="checkbox"/> Severe <input type="checkbox"/> Not assessed |           |       |         |                |

## 4. Language (Expressive and Receptive)

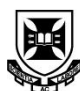

THE UNIVERSITY  
OF QUEENSLAND  
AUSTRALIA

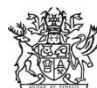

Queensland  
Government

| Test/subtest name                                                                                                                                     | Age/Date | Score | %ile/SD | Interpretation |
|-------------------------------------------------------------------------------------------------------------------------------------------------------|----------|-------|---------|----------------|
|                                                                                                                                                       |          |       |         |                |
|                                                                                                                                                       |          |       |         |                |
|                                                                                                                                                       |          |       |         |                |
| Other information:                                                                                                                                    |          |       |         |                |
| Language impairment <input type="checkbox"/> None <input type="checkbox"/> Some <input type="checkbox"/> Severe <input type="checkbox"/> Not assessed |          |       |         |                |

### 5. Adaptive Behaviour, Social skills or Social Communication

| Test/subtest name                                                                                                                                                                                          | Age/ Date | Score | %ile/SD | Interpretation |
|------------------------------------------------------------------------------------------------------------------------------------------------------------------------------------------------------------|-----------|-------|---------|----------------|
|                                                                                                                                                                                                            |           |       |         |                |
|                                                                                                                                                                                                            |           |       |         |                |
|                                                                                                                                                                                                            |           |       |         |                |
| Other information:                                                                                                                                                                                         |           |       |         |                |
| Adaptive behaviour, social skills, or social communication impairment<br><input type="checkbox"/> None <input type="checkbox"/> Some <input type="checkbox"/> Severe <input type="checkbox"/> Not assessed |           |       |         |                |

### Neurodevelopmental Summary

|                                                                                                                                                                                                             |
|-------------------------------------------------------------------------------------------------------------------------------------------------------------------------------------------------------------|
| Number of neurodevelopmental domains with evidence of severe impairment:<br><input type="checkbox"/> None <input type="checkbox"/> 1 <input type="checkbox"/> 2 <input type="checkbox"/> 3 or more(specify) |
|-------------------------------------------------------------------------------------------------------------------------------------------------------------------------------------------------------------|

|            |       |                     |               |         |
|------------|-------|---------------------|---------------|---------|
| <b>FAS</b> | No =0 | High risk of FAS =1 | Definitely =2 | Unclear |
|------------|-------|---------------------|---------------|---------|

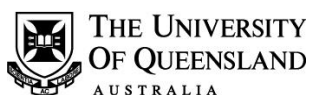
**ASD SYMPTOMOLOGY**

| Item                                      | Score                      |                            |                            |                            |                            |
|-------------------------------------------|----------------------------|----------------------------|----------------------------|----------------------------|----------------------------|
| Visual Tracking                           | <input type="checkbox"/> 0 | <input type="checkbox"/> 1 | <input type="checkbox"/> 2 |                            | <input type="checkbox"/> 8 |
| Disengagement of attentions               | <input type="checkbox"/> 0 | <input type="checkbox"/> 1 | <input type="checkbox"/> 2 |                            | <input type="checkbox"/> 8 |
| Orientation to name                       | <input type="checkbox"/> 0 | <input type="checkbox"/> 1 | <input type="checkbox"/> 2 |                            | <input type="checkbox"/> 8 |
| Differential response to facial emotion   | <input type="checkbox"/> 0 | <input type="checkbox"/> 1 | <input type="checkbox"/> 2 |                            | <input type="checkbox"/> 8 |
| Anticipatory social response              | <input type="checkbox"/> 0 | <input type="checkbox"/> 1 | <input type="checkbox"/> 2 | <input type="checkbox"/> 3 | <input type="checkbox"/> 8 |
| Imitation                                 | <input type="checkbox"/> 0 | <input type="checkbox"/> 1 | <input type="checkbox"/> 2 |                            | <input type="checkbox"/> 8 |
| Social Babbling                           | <input type="checkbox"/> 0 | <input type="checkbox"/> 1 | <input type="checkbox"/> 2 | <input type="checkbox"/> 3 | <input type="checkbox"/> 8 |
| Eye Contact                               | <input type="checkbox"/> 0 |                            | <input type="checkbox"/> 2 |                            | <input type="checkbox"/> 8 |
| Reciprocal social smile                   | <input type="checkbox"/> 0 | <input type="checkbox"/> 1 | <input type="checkbox"/> 2 | <input type="checkbox"/> 3 | <input type="checkbox"/> 8 |
| Coordination of eye gaze                  | <input type="checkbox"/> 0 | <input type="checkbox"/> 1 | <input type="checkbox"/> 2 | <input type="checkbox"/> 3 | <input type="checkbox"/> 8 |
| Behavioural Reactivity                    | <input type="checkbox"/> 0 | <input type="checkbox"/> 1 | <input type="checkbox"/> 2 | <input type="checkbox"/> 3 | <input type="checkbox"/> 8 |
| Social interest and shared affect         | <input type="checkbox"/> 0 | <input type="checkbox"/> 1 | <input type="checkbox"/> 2 | <input type="checkbox"/> 3 | <input type="checkbox"/> 8 |
| Transitions                               | <input type="checkbox"/> 0 | <input type="checkbox"/> 1 | <input type="checkbox"/> 2 |                            | <input type="checkbox"/> 8 |
| Motor control                             | <input type="checkbox"/> 0 | <input type="checkbox"/> 1 | <input type="checkbox"/> 2 |                            | <input type="checkbox"/> 8 |
| Atypical motor behaviour                  | <input type="checkbox"/> 0 |                            | <input type="checkbox"/> 2 |                            | <input type="checkbox"/> 8 |
| Engagement of attention                   | <input type="checkbox"/> 0 | <input type="checkbox"/> 1 | <input type="checkbox"/> 2 |                            | <input type="checkbox"/> 8 |
| Insistence on specific objects/activities | <input type="checkbox"/> 0 | <input type="checkbox"/> 1 | <input type="checkbox"/> 2 |                            | <input type="checkbox"/> 8 |
| Sharing Interest                          | <input type="checkbox"/> 0 | <input type="checkbox"/> 1 | <input type="checkbox"/> 2 |                            | <input type="checkbox"/> 8 |
| <b>Total score</b>                        |                            |                            |                            |                            |                            |

| ASD | No =0 | High risk of ASD =1 | Definitely =2 | Unclear |
|-----|-------|---------------------|---------------|---------|
|-----|-------|---------------------|---------------|---------|

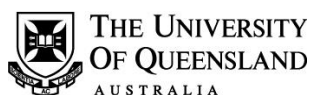

## 12-Month Medical Assessment- Blinded Differential Diagnosis

Study ID: □□□

Date: □□/□□/□□□□

Completed by:

|                                  |                                        |              |                                |         |
|----------------------------------|----------------------------------------|--------------|--------------------------------|---------|
| <b>Cerebral palsy</b>            | No =0                                  | High risk =1 | Definitely =2                  | Unclear |
| <b>Motor type</b>                | <b>Primary</b>                         |              | <b>Secondary</b>               |         |
|                                  | Spastic =1                             |              | Spastic =1                     |         |
|                                  | dyskinetic- dystonic =2                |              | dyskinetic- dystonic =2        |         |
|                                  | dyskinetic- choreoathetotic =3         |              | dyskinetic- choreoathetotic =3 |         |
|                                  | Hypotonic =4                           |              | Hypotonic =4                   |         |
|                                  | Ataxic =5                              |              | Ataxic =5                      |         |
| <b>Distribution</b>              | Bilateral =1 / unilateral =2           |              | Bilateral =1 / unilateral =2   |         |
|                                  | No of limbs 1 / 2 / 3 / 4              |              | No of limbs 1 / 2 / 3 / 4      |         |
| GMFCS level<br>(0-2 years scale) | I =1 / II =2 / III =3 / IV = 4 / V = 5 |              |                                |         |
| MACs level<br>(1-4 year scale)   | I =1 / II =2 / III =3 / IV = 4 / V = 5 |              |                                |         |
| Comments                         |                                        |              |                                |         |

|            |       |                     |               |         |
|------------|-------|---------------------|---------------|---------|
| <b>FAS</b> | No =0 | High risk of FAS =1 | Definitely =2 | Unclear |
| Comments   |       |                     |               |         |

|            |       |                     |               |         |
|------------|-------|---------------------|---------------|---------|
| <b>ASD</b> | No =0 | High risk of ASD =1 | Definitely =2 | Unclear |
| Comments   |       |                     |               |         |

### S3: LEAP – CP Medical and Allied Health Resource Form

Study ID: Date: 

Form completed by:

Interviewer initials: 

#### Allied Health

During the last 6 months have you received treatment or advice from:

|                         |                                                                                                                                                                                                    |
|-------------------------|----------------------------------------------------------------------------------------------------------------------------------------------------------------------------------------------------|
| <b>1. Physiotherapy</b> | <input type="radio"/> Yes <input type="radio"/> No                                                                                                                                                 |
| Does it emphasise       | <input type="radio"/> Motor learning <input type="radio"/> Equipment <input type="radio"/> Functional therapy <input type="radio"/> Stretching & positioning<br><input type="radio"/> Other: _____ |
| How often               | <input type="checkbox"/> <input type="checkbox"/> Visits per 6 months                                                                                                                              |
| Format                  | <input type="radio"/> Individual <input type="radio"/> Group <input type="radio"/> Home program                                                                                                    |
| Location                | <input type="radio"/> Hospital <input type="radio"/> Community <input type="radio"/> Home <input type="radio"/> Private practice                                                                   |

|                                |                                                                                                                                                                                                    |
|--------------------------------|----------------------------------------------------------------------------------------------------------------------------------------------------------------------------------------------------|
| <b>2. Occupational therapy</b> | <input type="radio"/> Yes <input type="radio"/> No                                                                                                                                                 |
| Does it emphasise              | <input type="radio"/> Motor learning <input type="radio"/> Equipment <input type="radio"/> Functional therapy <input type="radio"/> Stretching & positioning<br><input type="radio"/> Other: _____ |
| How often                      | <input type="checkbox"/> <input type="checkbox"/> Visits per 6 months                                                                                                                              |
| Format                         | <input type="radio"/> Individual <input type="radio"/> Group <input type="radio"/> Home program                                                                                                    |
| Location                       | <input type="radio"/> Hospital <input type="radio"/> Community <input type="radio"/> Home <input type="radio"/> Private practice                                                                   |

|                          |                                                                                                                                                                                                       |
|--------------------------|-------------------------------------------------------------------------------------------------------------------------------------------------------------------------------------------------------|
| <b>3. Speech therapy</b> | <input type="radio"/> Yes <input type="radio"/> No                                                                                                                                                    |
| Does it emphasise        | <input type="radio"/> Speech/ talking <input type="radio"/> Early communication skills (play) <input type="radio"/> Sign/ symbol <input type="radio"/> Mealtime<br><input type="radio"/> Other: _____ |
| How often                | <input type="checkbox"/> <input type="checkbox"/> Visits per 6 months                                                                                                                                 |
| Format                   | <input type="radio"/> Individual <input type="radio"/> Group <input type="radio"/> Home program                                                                                                       |
| Location                 | <input type="radio"/> Hospital <input type="radio"/> Community <input type="radio"/> Home <input type="radio"/> Private practice                                                                      |

|                         |                                                                                                                                  |
|-------------------------|----------------------------------------------------------------------------------------------------------------------------------|
| <b>4. Other</b>         | <input type="radio"/> Yes <input type="radio"/> No                                                                               |
| What does it emphasise? |                                                                                                                                  |
| How often               | <input type="checkbox"/> <input type="checkbox"/> Visits per 6 months                                                            |
| Format                  | <input type="radio"/> Individual <input type="radio"/> Group <input type="radio"/> Home program                                  |
| Location                | <input type="radio"/> Hospital <input type="radio"/> Community <input type="radio"/> Home <input type="radio"/> Private practice |

#### Medical

During the last fortnight, has your child been sick?  Yes  (number of days)  No

During the 6 months, has your child had:

|                                 |                                                                                                               |
|---------------------------------|---------------------------------------------------------------------------------------------------------------|
| <b>1. Admission to hospital</b> | <input type="radio"/> Yes <input type="radio"/> No Number of admissions <input type="checkbox"/>              |
| Visit 1                         | Reason:<br>Treatment/ investigation:<br>Length of stay <input type="checkbox"/> <input type="checkbox"/> days |
| Visit 2                         | Reason:<br>Treatment/ investigation:<br>Length of stay <input type="checkbox"/> <input type="checkbox"/> days |
| Visit 3                         | Reason:<br>Treatment/ investigation:<br>Length of stay <input type="checkbox"/> <input type="checkbox"/> days |
| Visit 4                         | Reason:<br>Treatment/ investigation:<br>Length of stay <input type="checkbox"/> <input type="checkbox"/> days |

|                          |                                                                                                    |
|--------------------------|----------------------------------------------------------------------------------------------------|
| <b>2. GP appointment</b> | <input type="radio"/> Yes <input type="radio"/> No Number of appointments <input type="checkbox"/> |
| Visit 1                  | Reason:<br>Treatment/ investigation:                                                               |
| Visit 2                  | Reason:<br>Treatment/ investigation:                                                               |
| Visit 3                  | Reason:<br>Treatment/ investigation:                                                               |



|                            |                                                                                                    |
|----------------------------|----------------------------------------------------------------------------------------------------|
| Visit 4                    | Reason:<br>Treatment/ investigation:                                                               |
| <b>3. Paediatrician</b>    | <input type="radio"/> Yes <input type="radio"/> No Number of appointments <input type="checkbox"/> |
| Visit 1                    | Reason:<br>Treatment/ investigation:                                                               |
| Visit 2                    | Reason:<br>Treatment/ investigation:                                                               |
| Visit 3                    | Reason:<br>Treatment/ investigation:                                                               |
| Visit 4                    | Reason:<br>Treatment/ investigation:                                                               |
| <b>4. Other specialist</b> | <input type="radio"/> Yes <input type="radio"/> No Number of appointments <input type="checkbox"/> |
| Who:                       |                                                                                                    |
| Visit 1                    | Reason:<br>Treatment/ investigation:                                                               |
| Visit 2                    | Reason:<br>Treatment/ investigation:                                                               |
| Visit 3                    | Reason:<br>Treatment/ investigation:                                                               |
| Visit 4                    | Reason:<br>Treatment/ investigation:                                                               |
| <b>5. Other specialist</b> | <input type="radio"/> Yes <input type="radio"/> No Number of appointments <input type="checkbox"/> |
| Who:                       |                                                                                                    |
| Visit 1                    | Reason:<br>Treatment/ investigation:                                                               |
| Visit 2                    | Reason:<br>Treatment/ investigation:                                                               |
| Visit 3                    | Reason:<br>Treatment/ investigation:                                                               |
| Visit 4                    | Reason:<br>Treatment/ investigation:                                                               |
| <b>6. Other specialist</b> | <input type="radio"/> Yes <input type="radio"/> No Number of appointments <input type="checkbox"/> |
| Who:                       |                                                                                                    |
| Visit 1                    | Reason:<br>Treatment/ investigation:                                                               |
| Visit 2                    | Reason:<br>Treatment/ investigation:                                                               |
| Visit 3                    | Reason:<br>Treatment/ investigation:                                                               |
| Visit 4                    | Reason:<br>Treatment/ investigation:                                                               |

**Equipment**

Has your child been provided with any equipment:

- Supportive chair/ seating
- Walking aids
- standing frame
- Splints / orthoses
- Wheelchair

**National Disability Insurance Scheme (NDIS) Funding**

|                                            |                                                                                                                                                                            |
|--------------------------------------------|----------------------------------------------------------------------------------------------------------------------------------------------------------------------------|
| Does your child have an NDIS plan?         | <input type="radio"/> Yes <input type="radio"/> No                                                                                                                         |
| Is the plan self managed?                  | <input type="radio"/> Yes <input type="radio"/> No                                                                                                                         |
| What are you able to use your funding for? | <input type="radio"/> Therapy (eg physiotherapy, OT)<br><input type="radio"/> Equipment (eg walking aid/ orthoses)<br><input type="radio"/> Consumables (eg feeding tubes) |
